# Supplementary material for: The recolonisation of volcanically disturbed Eocene habitats of Central Europe: the maar lakes of Messel and Offenthal (SW Germany) compared
Source: Springer Nature journal article supplement (doi:10.1007/s12549-020-00425-4), 2020-07-02
Supplement: MOESM1 [file 12549_2020_425_MOESM1_ESM.docx]

Maryam Moshayedi, Olaf K. Lenz, Volker Wilde and Matthias Hinderer: The recolonization of volcanically disturbed Eocene habitats of Central Europe: The maar lakes of Messel and Offenthal (SW Germany) compared

**Supplementary Figure 1a:** complete list of core images illustrating the lacustrine record of Offenthal between 25.30 and 5.56 m core depth. The positions of palynological samples are indicated by white circles. The pictures are based on photograph of of FIS/HLUG (F.J Harms, W. Schniller & M. Stryj) from the core BK 1E: 10994.pcd- 11042.pcd.

**
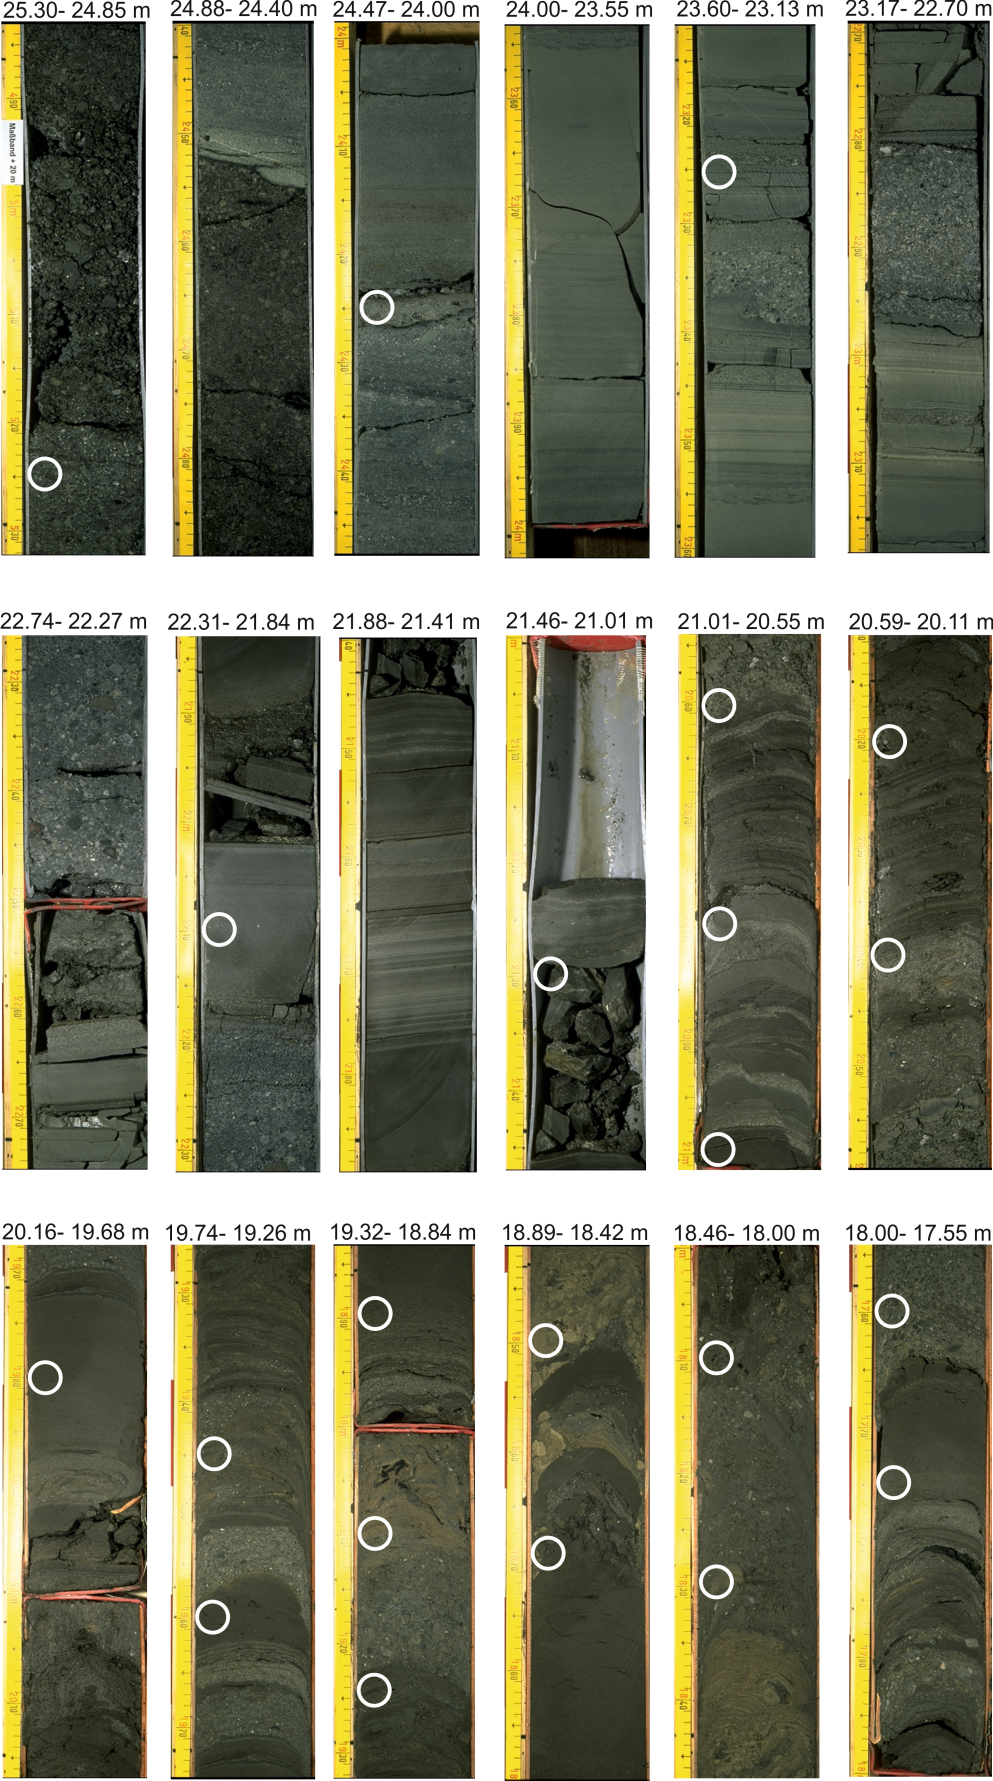
**

**Supplementary Figure 1b:**

**
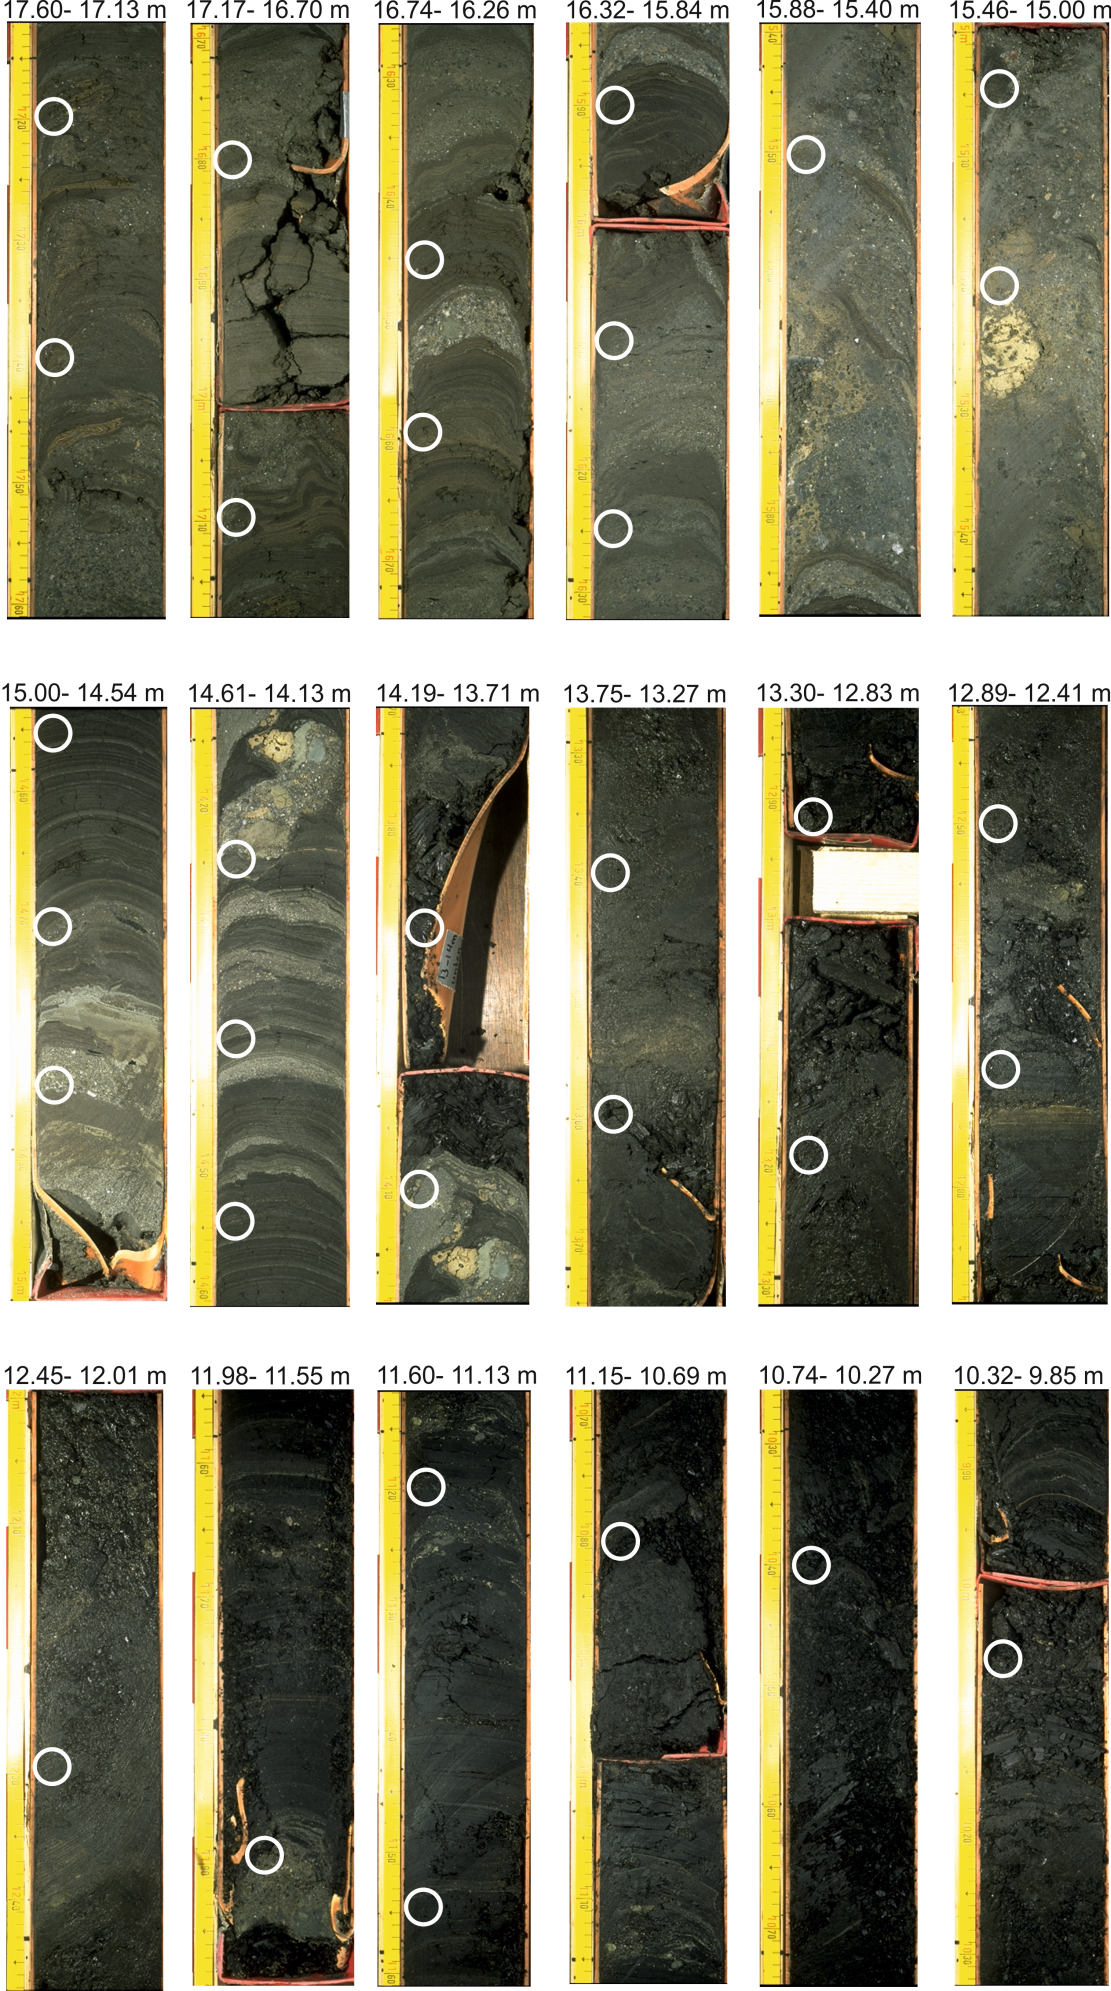
**

**Supplementary Figure 1c:**

**
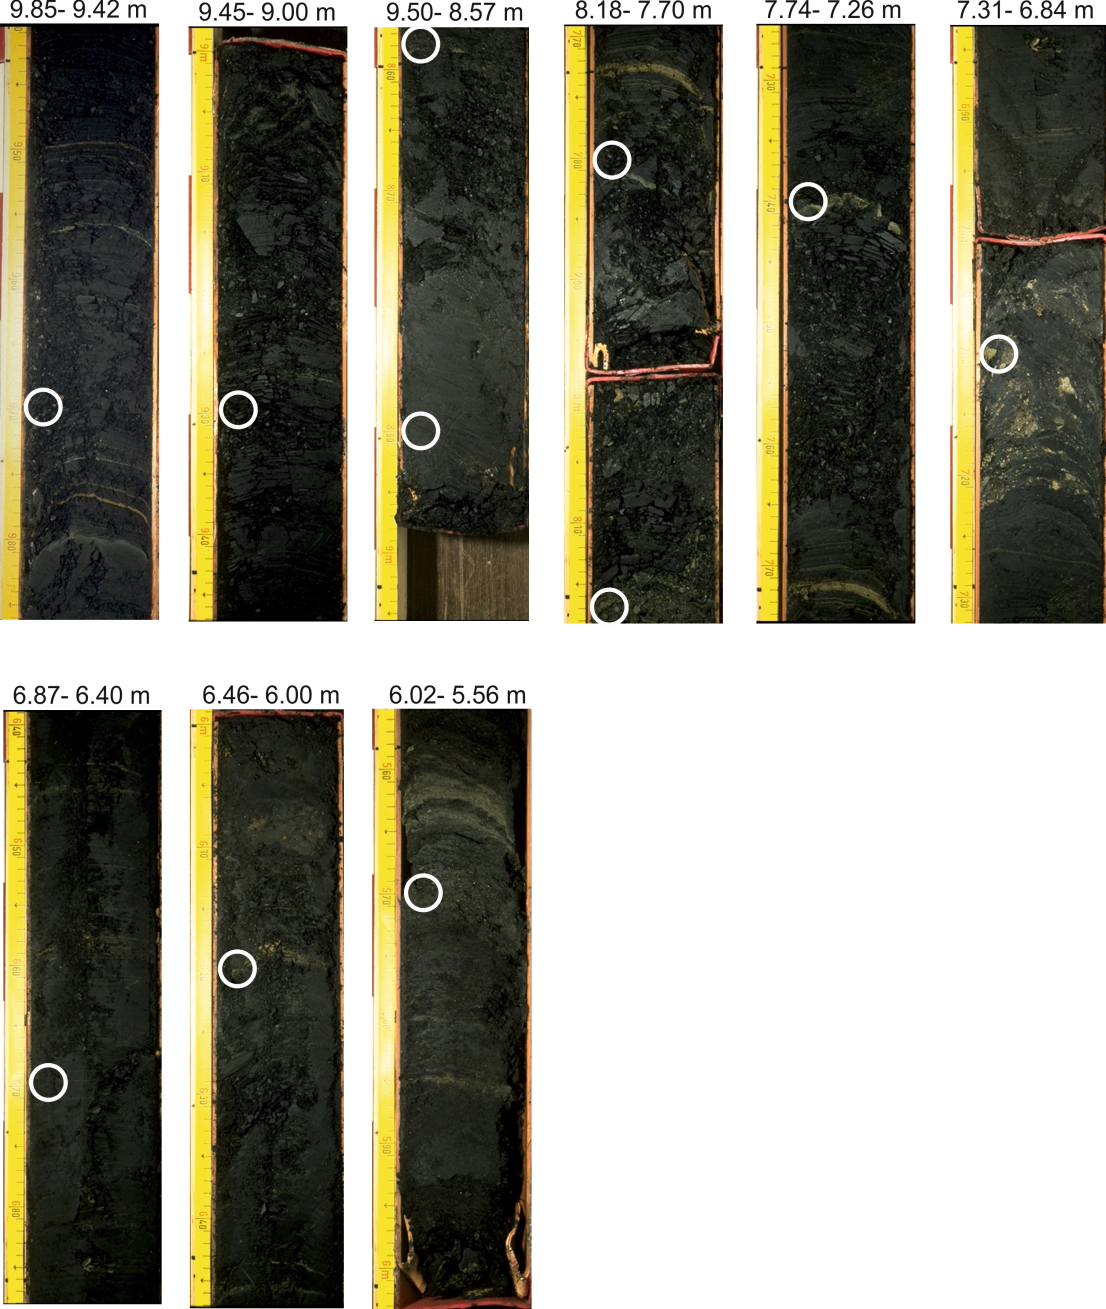
**
