# Supplementary material for: The recolonisation of volcanically disturbed Eocene habitats of Central Europe: the maar lakes of Messel and Offenthal (SW Germany) compared
Source: Springer Nature journal article supplement (doi:10.1007/s12549-020-00425-4), 2020-07-02
Supplement: MOESM3 [file 12549_2020_425_MOESM3_ESM.xlsx]

## Sheet: Raw data
Maryam Moshayedi, Olaf K. Lenz, Volker Wilde and Matthias Hinderer: The recolonization of volcanically disturbed Eocene habitats of Central Europe: The maar lakes of Messel and Offenthal (SW Germany compared.
SupplementaryTable 2. Abundance percentages of variables and palynomorphs of the lake Offenthal used for statistical analyses
Depth	Leiotriletes spp.	Echinatisporites longechinatus	Trilites menatensis	Ischyasporites spp.	Baculatisporites spp.	Tegumentisporites spp.	Polypodiaceoisporites spp.	Camarozonosporites spp.	Laevigatosporites spp.	Punctatosporites palaeogenicus	Verrucatosporites favus	Pityosporites labdacus	Inaperturopollenites spp.	Milfordia spp.	Emmapollis pseudoemmaensis	Monocolpopollenites spp.	Punctilongisulcites microechinatus	Nudopollis terminalis hastaformis	Interpollis spp.	Plicapollis spp.	Triatriopollenites spp.	Plicatopollis spp.	Momipites spp.	Platycaryapollenites spp.	caryapollenites spp.	Subtriporopollenites magnoporatus	Polyporopollenites verrucatus	Celtipollenites spp	Intratriporopollenites spp.	Bombacacidites spp.	Porocolpopollenites rarobaculatus	Symplocospollenites orbis	Labrapollis labraferus	Compositoipollenites rhizophorus	Pentapollis pentangulus	Tricolpopollenites liblarensis	Tricolpopollenites microhenrici	Tricolpopollenites retiformis	Tricolpopollenites vegetus	Trocolpopollenites quisqualis	Tricolporopollenites cingulum	Tricolporopollenites pseudocingulum	Tricolporopollenites megaexactus	Edmundi group	Tricolporopollenites marcodurensis	Tricolporopollenites microreticulatus	Tricolporopollenites parmularius	Tricolporopollenites microporitus	Tricolporopollenites crassiexinus
5.7	2		1			2	3		1			12	4			2		3	1	7		30		1			1		2							7		1	2		64			4		4	27
5.9	8		1			1	9					16	4				1	2		4		36		4												7			3		64			5		7	26
6.2	7		2			1	10	1	3	1		39	4					7		5		37		4			1		1							6	1		3		69			8	1	4	14
6.7	9		1				2					10	10							12		62		2				3	2							14	1	2	4		55			5		4	31
7.1	10				1		3		2		1	15	3				1	2		5		32	1	3		4	1	2	2							12		1	2		85			4		6	10
7.4	11		3		1		1		1		1	26	5				2			5		37	2	4			2	1	1				1			9		2	3		64			5		4	37
7.8	5	1	1						1		1	26	6		2	1	4	1		3		23		6			2	5			1					11	1	1	7		74		1	8	1	1	11
8.2	2						1		1			11	4		3		2	2		9		43		3			2	4			4					22		3	14		46			3	1	12	26
8.55	5		1						2	2		8	6		1			1		3		33	1	3			3				1					8			7		96			10		6	22
8.9	8						3					8	5		1			1		5		29		3		1	1	1		1	2					10		1	8		97			7		10	16
9.3	7		1				1		2			6	5		2		1	1		5		43		3					1		3					14		1	4		87			5		9	5	3
9.7	19		1				5		1			14	3							5		36		4		5		2	1	1						15		2	7		70			5	2	2	28
10.05	10		1				1		1			2	5		1	1	2	1	2	5		41	1	5	1		1	2					1			14			3		67			9	1	10	16
10.4	16		2				2					1	4		1				1	10		61	2	6		6		3	1		2					16	1	2	5		57			4	1	3	8
10.8	19		1				2		2	1		5	8				3	3		7		47		4		3	3	4	2		1					7		1	8		61			4	3	5	10
11.2	38						2		1		1	8	7		1		2			3		32		5		1		4	2							11	2	3	3		60			2		8	17
11.55	21	1	2						2			8	6		3		4			8		44	1	4		2	1	4		1	2		1			19		3	8		52			3		8	7
11.9	30		1						6	1		13	7		2		1	1		6		57	2	3		3	2	4			2					19		2	4	1	73			5	2	4	11
12.3	20		1				5		3			8	2				2	2		7		44	1	4		2		5		1						14		2	4		76			11	3	6	10
12.5	10						10		1			8	5		2		1		1	1		50		4		2	3	4	2	1	1					14		1	7		74			7	4	7	6
12.7	10						6		1			11	6					3		2		34		2		2		4	1							14	1	2	2		78			8		6	10
12.95	19		2				6		3		2	6	9			2	2			1		20	1			3		3	1		2					19	1	1	6		67			2		3	7
13.2	16		3						1		2	12	10					2		3		38	2	2		2		5	5		1			1		12		2	8		64			4		7	2
13.4	52		6				3		4		2	12	3		3		1	2		6		37		3		1	2	3	2	1						15		2	1		39			5		6	3
13.6	27						2		2		1	12	4		3	1	1	4		6		50		3		2		4	1		2	1		1		20	1	2	5		65			4	1	6	2
13.9	51		2				5		1		1	16	1		2			4		4		45	1	3		2	3	3	1		1					10		3	7		48			4		8	5
14.1	20		4				4		2		1	9	8		3					10		59		5				6	2		2					4			7		44			3	1	6	1
14.25	29		3				2		2	1	2	8	6			1		2		7		78		6			1	5		2	2					7		2	3		52			1		4	3
14.4	12		3				4		3	1	1	8	8		1					7		54	2	10		1	2	3	1		1					22		1	3		53			4		8	4
14.55	15		5				6		3		2	9	9				1			8		43	1	5		3	1	6		1	2					12			5		94			8	1	4	1
14.7	32		4	1		1	7		1	1	1	8	10	2			1			2		35	1	8		7		4	1	2	1					8		1	4		87			5	1	11	2
14.85	17	1	6			1	7			1		14	5	4			1		2	12		41		5		2		9	3		2			1		3			3		74			8		10	2
15.05	25		5				5		1			5	7	6	1			1	2	6		38		4		3		4			3					5	2	1	1		59			2	2	7	4
15.2	2									1		5	5	1	1		1	1		7		53		3		3	2	4	1		2					2			2		85			2		11	5
15.5	13		6				8			1		4	4	2	1					8		50	1	5		4	1	7	2	1	3					5		1			79			3	1	9	4
15.9	27	1	4				10		2			10	8	2			1			1		45		4			1	5	1	1	3					18			5		63			3	1	7	1
16.1	9		4				3		2			1	8	6	4			1		4		56		6		3	3	6	2	1						3			2		60			11	3	9	4
16.25	16		2				3		5			11	5	1	4		4	1		9		50		2		3	4	5			1					6		1	4		57			10	1	11	6
16.45	21		6				8		1			6	5	4	5		2			1		54	1	7		2		6			2					9			5		62			6		10	4
16.6	18		7				7	1	1	1		7	7	3	1	3	1	2		2		43	1	6		2		8	1							17		4	8		51			4		12	5
16.8	4	1	3				7			2		6	12	7	2					9		52	2	1		5		5	1	1	3					7	1	1	3		62			3	1	6	5
17	18		5				3		1	4		6	7	8	1		1			6		47		8		4		2		1	2					15	1	2	6		61			2		10	11	1
17.2	22		5				8		1	2		9	9	4	4		1	1		8		46		3		4	2	1			5					5			9		64			8	1	7	6
17.4	11		7				6		1			8	4	4	2		1	3		6		43		5			2	3		1	2					24		1	3		52			8	1	11	6
17.6	10		6				16				2	5	11	2	3		1			10		49	3	2		4		6	3		1					9		2	6		56			1		24	3
17.75	23	1	7		1		14		2		5	5	9	8	1		2	1		9		40	1	3		4		7	3			1				4	1	1	3		67			4		12	10
17.9	17		2			1	5		1	1	1	7	9	1	4		2			6		50				1	2	7	2		6				1	6		1	2		79			7	1	9	2
18.1	13		8			1	11		1			10	10	2	3			3		7		56		4		3	2	3	4		4					6		2	1		57	2		2	1	10	4
18.3	8		5		1		8	1	2		1	9	7	8				1		13		42	3	4		3	1	9			1					6			4		60			1	1	15	13
18.5	30		9		1	1	4		1		1	8	6							5	1	38	1	5	1	2	4	1								7	1		2	1	54			4	2	10	14	2
18.7	29		13		1		2	1	2	1		8	8	5	2					1		54		2	1	2	5	9		1	6				1	4	1		3		41			12	3	7	8
18.9	23		21				26			1		7	5		2	1		3		2		29	1			2	2	3	3	2	2					8				1	72			5	1	4	4
19.1	22		8			1	3	1	1			10	5	1	1			1	1	2		39	1	2		2	1	2	3		4					17	1	1	4	2	57			1		22	11
19.25	14		6				6				1	15	8	1	4	1	2	2		8		44		6		1		5	1		3					7			5		68	2		4		16	8
19.45	15		13			1	8		3		1	9	7	6	2				1	6		45		4		2		3	4	3	4					2		2	3		55	1		5	2	12	7
19.6	15		10				3		2	1		11	7	4	4		2	3		7		33		4	1			5	1	3	1				1	7		3	4		71	1		8	2	6	10
19.8	29	1	10				4			1		11	15	2	5		1			5		25		3			2	7		1				1		3			2		63	1		9	1	13	7	3
20	26		20	1		1	16		3	1	1	11	6	3					1	1		25		2		1	1	3	1							16			5		52			1	1	8	5	3
20.2	23		7			1	6			1	1	11	4	4	1	1	1	1		1		25		2		2	2	5	2	1	3				1	7		1	7		82			3		11	14	1	2
20.4	12		8				1		3	2	1	15	10	6		1		2	1	8		29	2	1	1	1		7		2				1	2	5		1	1		57	5		6		11	10		1
20.6	19		10	1			4		2	2		8	4	2	3	1	2	1		5		41		5	1	2		7	3	1	2					25		7	2	4	28	1		3	2	15	18
20.8	27		14	2			2			3		11	9	1	1		1	2		7	1	20		3		1		5	2	3						2			2		60			8	2	10	16	1
21	22		12	1			2		2			12	9	2	1			3		8		29	2	2		3		3	1	1	1					6	1	2	1		72	2		6		14	13
21.32	37		8			2	4	1	1	1		2	7					2		7		34	1			1		1			1					2		1	1	1	26			2	1	3	5
22.1	20		29			1	1		2			1	17	1				3	1	6		40	1	6		1		3	1		3					3		2		1	45	1		6	1	16	3
23.26	7		24	2					6			6	11							1		16		1		1		1													7			3	1	6	15
24.25												4																1
25.25												2	3							1																											2
[truncated: 15 more columns]

## Sheet: Percentages
Depth	Leiotriletes spp.	Echinatisporites longechinatus	Trilites menatensis	Ischyasporites spp.	Baculatisporites spp.	Tegumentisporites spp.	Polypodiaceoisporites spp.	Camarozonosporites spp.	Laevigatosporites spp.	Punctatosporites palaeogenicus	Verrucatosporites favus	Pityosporites labdacus	Inaperturopollenites spp.	Milfordia spp.	Emmapollis pseudoemmaensis	Monocolpopollenites spp.	Punctilongisulcites microechinatus	Nudopollis terminalis hastaformis	Interpollis spp.	Plicapollis spp.	Triatriopollenites spp.	Plicatopollis spp.	Momipites spp.	Platycaryapollenites spp.	Caryapollenites spp.	Subtriporopollenites magnoporatus	Polyporopollenites verrucatus	Celtipollenites spp	Intratriporopollenites spp.	Bombacacidites spp.	Porocolpopollenites rarobaculatus	Symplocospollenites orbis	Labrapollis labraferus	Compositoipollenites rhizophorus	Pentapollis pentangulus	Tricolpopollenites liblarensis	Tricolpopollenites microhenrici	Tricolpopollenites retiformis	Tricolpopollenites vegetus	Trocolpopollenites quisqualis	Tricolporopollenites cingulum	Tricolporopollenites pseudocingulum	Tricolporopollenites megaexactus	Tricolporopollenites edmundi	Tricolporopollenites marcodurensis	Tricolporopollenites microreticulatus	Tricolporopollenites parmularius	Tricolporopollenites microporitus	Tricolporopollenites crassiexinus
5.7	0.99		0.5			0.99	1.49		0.5			5.94	1.98			0.99		1.49	0.5	3.47		14.85		0.5			0.5	0.99								3.47		0.5	0.99		31.68			1.98		1.98	13.37
5.9	3.54		0.44			0.44	3.98		0.44			7.08	1.77				0.44	0.88		1.77		15.39		1.77												3.1			1.33		28.32			2.21		3.1	11.5
6.2	2.77		0.79			0.4	3.95	0.4	1.19	0.4		15.42	1.58					2.77		1.98		14.62		1.58			0.4		0.4							2.37	0.4		1.19		27.27			3.16	0.4	1.58	5.53
6.7	3.69		0.41				0.82					4.1	4.1							4.92		25.41		0.82				1.23	0.82							5.74	0.41	0.82	1.64		22.54			2.05		1.64	12.7
7.1	4.03				0.4		1.21		0.81		0.4	6.05	1.21				0.4	0.81		2.02		12.9	0.4	1.21		1.61	0.4	0.81	0.81							4.84		0.4	0.81		34.27			1.61		2.42	4.03
7.4	4.2		1.15		0.38		0.38		0.38		0.38	9.92	1.91				0.76			1.91		14.12	0.76	1.53			0.76	0.38	0.38				0.38			3.44		0.76	1.15		24.43			1.19		1.53	14.12
7.8	2.14	0.43	0.43						0.43		0.43	11.11	2.56		0.85	0.43	1.71	0.43		1.28		9.83		2.56			0.85	2.14		0.43						4.7	0.43	0.43	2.99		31.62		0.43	3.42	0.43	0.43	4.7
8.2	0.79						0.4		0.4			4.35	1.58		1.19		0.79	0.79		3.56		17		1.19			0.79	1.58			1.58					8.7		1.19	5.53		18.18			1.19	0.4	4.74	10.28
8.55	1.99		0.4						0.8	0.8		3.19	2.39		0.4			0.4		1.2		13.45	0.4	1.2				1.2			0.4					3.19			2.79		38.25			3.98		2.39	8.76
8.9	3.27						1.22					3.27	2.04		0.41			0.41		2.04		11.84		1.22		0.41	0.41	0.41		0.41	0.82					4.08		0.41	3.27		39.59			2.86		4.08	6.53
9.3	2.83		0.4				0.4		0.81			2.43	2.02		0.81		0.4	0.4		2.02		17.41		1.21					0.4		1.21					5.67		0.4	1.62		35.22			2.02		3.64	2.02	1.21
9.7	7.48		0.39				1.97		0.39			5.51	1.18							1.97		14.17		1.57		1.97		0.79	0.39	0.39						5.91		0.79	2.76		27.56			1.97	0.79	0.79	11.02
10.05	4.15		0.41				0.41		0.41			0.83	2.07		0.41	0.41	0.83	0.41	0.83	2.07		17.01	0.41	2.07	0.41		0.41	0.83					0.41			5.81			1.24		27.8			3.73	0.41	4.15	6.64
10.4	6.23		0.78				0.78					0.39	1.56		0.39				0.39	3.89		23.74	0.78	2.33		2.33		1.17	0.39		0.78					6.23	0.39	0.78	1.95		22.18			1.56	0.39	1.17	3.11
10.8	7.51		0.4				0.79		0.79	0.4		1.98	3.16				1.19	1.19		2.77		18.58		1.58		1.19	1.19	1.58	0.79		0.4					2.77		0.4	3.16		24.11			1.58	1.19	1.98	3.95
11.2	15.32						0.81		0.4		0.4	3.23	2.82		0.4		0.81			1.21		12.9		2.02		0.4		1.61	0.81							4.44	0.81	1.21	1.21		24.19			0.81		3.23	6.85
11.55	8.3	0.4	0.79						0.79			3.16	2.37		1.19		1.58			3.16		17.39	0.4	1.58		0.79	0.4	1.58		0.4	0.79		0.4			7.51		1.19	3.16		20.55			1.19		3.16	2.77
11.9	10.56		0.35						2.11	0.35		4.58	2.46		0.7		0.35	0.35		2.11		20.07	0.7	1.06		1.06	0.7	1.41			0.7					6.69		0.7	1.41	0.35	25.7			1.76	0.7	1.41	3.87
12.3	7.72		0.39				1.93		1.16			3.09	0.77				0.77	0.77		2.7		16.99	0.39	1.54		0.77		1.93		0.39						5.41		0.77	1.54		29.34			4.25	1.16	2.32	3.86
12.5	3.72						3.72		0.37			2.97	1.86		0.74	0.37			0.37	0.37		18.59		1.49		0.74	1.12	1.49	0.74	0.34	0.34					5.2		0.37	2.6		27.51			2.6	1.49	2.6	2.23
12.7	4.22						2.53		0.42			4.64	2.53					1.27		0.84		14.35		0.84		0.84		1.69	0.42							5.91	0.42	0.84	0.84		32.91			3.38		2.53	4.22
12.95	8.88		0.93				2.8		1.4		0.93	2.8	4.21			0.93	0.93			0.47		9.35	0.47			1.4		1.4	0.47		0.93					8.88	0.47	0.47	2.8		31.31			0.93		1.4	3.27
13.2	6.87		1.29						0.43		0.86	5.15	4.29					0.86		1.29		16.31	0.86	0.86		0.86		2.15	2.15		0.43			0.43		5.15		0.86	3.43		27.47			1.72		3	0.86
13.4	20.55		2.37				1.19		1.58		0.79	4.74	1.19		1.19		0.4	0.79		2.37		14.62		1.19		0.4	0.79	1.19	0.79	0.4						5.93		0.79	0.4		15.42			1.98		2.37	1.19
13.6	10.42						0.77		0.77		0.39	4.63	1.54		1.16	0.39	0.39	1.54		2.32		19.31		1.16		0.77		1.54	0.39		0.77	0.39		0.39		7.72	0.39	0.77	1.93		25.1			1.54	0.39	2.32	0.77
13.9	20.32		0.8				1.99		0.4		0.4	6.37	0.4		0.8			1.59		1.59		17.93	0.4	1.2		0.8	1.2	1.2	0.4		0.4					3.98		1.2	2.79		19.12			1.59		3.19	1.99
14.1	8		1.6				1.6		0.8		0.4	3.6	3.2		1.2					4		23.6		2			1.2	2.4	0.8		0.8					1.6			2.8		17.6			1.2	0.4	2.4	0.4
14.25	11.28		1.17				0.78		0.78	0.39	0.78	3.11	2.33			0.39		0.78		2.72		30.35		2.33			0.39	1.95		0.78	0.78					2.72		0.78	1.17		20.23			0.39		1.56	1.17
14.4	4.78		1.2				1.59		1.2	0.4	0.4	3.19	3.19		0.4					2.79		21.51	0.8	3.98		0.4	0.8	1.2	0.4		0.4					8.76		0.4	1.2		21.12			1.59		3.19	1.59
14.55	5.38		1.79				2.15		1.08		0.72	3.23	3.23				0.36			2.87		15.41	0.36	1.79		1.08	0.36	2.15		0.36	0.72					4.3			1.79		33.69			2.87	0.36	1.43	0.36
14.7	11.68	0.36	1.46	0.36		0.36	2.55		0.36	0.36	0.36	2.92	3.65	0.73			0.36			0.73		12.77	0.36	2.92		2.55		1.46	0.36	0.73	0.36					2.92		0.36	1.46		31.75			1.82	0.36	4.01	0.73
14.85	6.42	0.38	2.26			0.38	2.64			0.38		5.28	1.89	1.51			0.38		0.75	4.53		15.47		1.89		0.75		3.4	1.13		0.75			0.38		1.13			1.13		27.92			3.02		3.77	0.75
15.05	10.55		2.11				2.11		0.42			2.11	2.95	2.53	0.42			0.42	0.84	2.53		16.03		1.69		1.27		1.69			1.27					2.11	0.84	0.42	0.42		24.89			0.84	0.84	2.95	1.69
15.2	0.88									0.44		2.19	2.19	0.44	0.44		0.44	0.44		3.07		23.25		1.32		1.32	0.88	1.75	0.44		0.88					0.88			0.88		37.28			0.88		4.82	2.19
15.5	5.02		2.32				3.09			0.39		1.54	1.54	0.77	0.39					3.09		19.31	0.39	1.93		1.54	0.39	2.7	0.77	0.39	1.16					1.93		0.39			30.5			1.16	0.39	3.47	1.54
15.9	10.31	0.38	1.53				3.82		0.76			3.82	3.05	0.76			0.38			0.38		17.18		1.53			0.38	1.91	0.38	0.38	1.15					6.87			1.91		24.05			1.15	0.38	2.67	0.38
16.1	3.78		1.68				1.26		0.84			0.42	3.36	2.52	1.68			0.42		1.68		23.53		2.52		1.26	1.26	2.52	0.84	0.42						1.26			0.84		25.21			4.62	1.26	3.78	1.68
16.25	6.35		0.79				1.19		1.98			4.37	1.98	0.4	1.59		1.59	0.4		3.57		19.84		0.79		1.19	1.59	1.98			0.4					2.38		0.4	1.59		22.62			3.97	0.4	4.37	2.38
16.45	8.27		2.36				3.15		0.39			2.36	1.97	1.57	1.97		0.79			0.39		21.26	0.39	2.76		0.79		2.36			0.79					3.54			1.97		24.41			2.36		3.94	1.57
16.6	7.38		2.87				2.87	0.41	0.41	0.41		2.87	2.87	1.23	0.41	1.23	0.41	0.82		0.82		17.62	0.41	2.46		0.82		3.28	0.41							6.97		1.64	3.28		20.9			1.64		4.92	2.05
16.8	1.6	0.4	1.2				2.8			0.8		2.4	4.8	2.8	0.8					3.6		20.8	0.8	0.4		2		2	0.4	0.4	1.2					2.8	0.4	0.4	1.2		24.8			1.2	0.4	2.4	2
17	6.77		1.88				1.13		0.38	1.5		2.26	2.63	3.01	0.38		0.38			2.26		17.67		3.01		1.5		0.75		0.38	0.75					5.64	0.38	0.75	2.26		22.93			0.75		3.76	4.14	0.38
17.2	8.4		1.91				3.05		0.38	0.76		3.44	3.44	1.53	1.53		0.38	0.38		3.05		17.56		1.15		1.53	0.76	0.38			1.91					1.91			3.44		24.43			3.05	0.38	2.67	2.29
17.4	4.53		2.88				2.47		0.41			3.29	1.65	1.65	0.82		0.41	1.23		2.47		17.7		2.06			0.82	1.23		0.41	0.82					9.88		0.41	1.23		21.4			3.29	0.41	4.53	2.47
17.6	3.97		2.38				6.35				0.79	1.98	4.37	0.79	1.19		0.4			3.97		19.44	1.19	0.79		1.59		2.38	1.19		0.4					3.57		0.79	2.38		22.22			0.4		9.52	1.19
17.75	7.99	0.35	2.43		0.35		4.86		0.69		1.74	1.74	3.13	2.78	0.35		0.69	0.35		3.13		13.89	0.35	1.04		1.39		2.43	1.04			0.35				1.39	0.35	0.35	1.04		23.26			1.39		4.17	3.47
17.9	6.49		0.76			0.38	1.91		0.38	0.38	0.38	2.67	3.44	0.38	1.53		0.76			2.29		19.08				0.38	0.76	2.67	0.76		2.29				0.38	2.29		0.38	0.76		30.15			2.67	0.38	3.44	0.76
18.1	4.96		3.05			0.38	4.2		0.38			3.82	3.82	0.76	1.15			1.15		2.67		21.37		1.53		1.15	0.76	1.15	1.53		1.53					2.29		0.76	0.38		21.76	0.76		0.76	0.38	3.82	1.53
18.3	3.17		1.98		0.4		3.17	0.4	0.79		0.4	3.57	2.78	3.17				0.4		5.16		16.67	1.19	1.59		1.19	0.4	3.57			0.4					2.38			1.59		23.81			0.4	0.4	5.95	5.16
18.5	11.28		3.38		0.38	0.38	1.5		0.38		0.38	3.01	2.26							1.88	0.38	14.29	0.38	1.88	0.38	0.75	1.5	0.38								2.63	0.38		0.75	0.38	20.3			1.5	0.75	3.76	5.26	0.75
18.7	10.94		4.91		0.38		0.75	0.38	0.75	0.38		3.02	3.02	1.89	0.75					0.38		20.38		0.75	0.38	0.75	1.89	3.4		0.38	2.26				0.38	1.51	0.38		1.13		15.47			4.53	1.13	2.64	3.02
18.9	8.81		8.05				9.96			0.38		2.68	2.3	1.92	0.77	0.38		1.15		0.77		11.11	0.38			0.77	0.77	1.15	1.15	0.77	0.77					3.07			0.38		27.59			1.92	0.38	1.53	1.53
19.1	8.76		3.19			0.4	1.2	0.4	0.4			3.98	1.99	0.4	0.4			0.4	0.4	0.8		15.54	0.4	0.8		0.8	0.4	0.8	1.2		1.59					6.77	0.4	0.4	1.59	0.8	22.71			0.4		8.76	4.38
19.25	5.24		2.25				2.25				0.37	5.62	3	0.37	1.5	0.37	0.75	0.75		3		16.48		2.25		0.37		1.87	0.37		1.12					2.62			1.87		25.47	0.75		1.5		5.99	3
19.45	5.7		4.94			0.38	3.04		1.14		0.38	3.24	2.66	2.28	0.76				0.38	2.28		17.11		1.52		0.76		1.14	1.52	1.14	1.52					0.76		0.76	1.14		20.91	0.38		1.9	0.76	4.56	2.66
19.6	5.86		3.91				1.17		0.78	0.39		4.3	2.73	1.56	1.56		0.78	1.17		2.73		12.89		1.56	0.39			1.95	0.39	1.17	0.39				0.39	2.73		1.17	1.56		27.73	0.39		3.13	0.78	2.34	3.91
19.8	11.15	0.38	3.85				1.54			0.38		4.23	5.77	0.77	1.92		0.38			1.92		9.62		1.15			0.77	2.69		0.38				0.38		1.15			0.77		24.23	0.38		3.46	0.38	5	2.69	1.15
20	10.32		7.94	0.4		0.4	6.35		1.19	0.4	0.4	4.37	2.38	1.19					0.4	0.4		9.92		0.79		0.4	0.4	1.19	0.4							6.35			1.98		20.63			0.4	0.4	3.17	1.98	1.19
20.2	8.91		2.71			0.39	2.33			0.39	0.39	4.26	1.55	1.55	0.39	0.39	0.39	0.39		0.39		9.69		0.78		0.78	0.78	1.94	0.78	0.39	1.16				0.39	2.71		0.39	2.71		31.78			1.16		4.26	5.43	0.39	0.78
20.4	4.84		3.23				0.4		1.21	0.81	0.4	6.05	4.03	2.42		0.4		0.81	0.4	3.23		11.69	0.81	0.4	0.4	0.4		2.82		0.81				0.4	0.81	2.02		0.4	0.4		22.98	2.02		2.42		4.44	4.03		0.4
20.6	7.54		3.97	0.4			1.59		0.79	0.79		3.17	1.59	0.79	1.19	0.4	0.79	0.4		1.98		16.27		1.98	0.4	0.79		2.78	1.19	0.4	0.79					9.92		2.78	0.79	1.59	11.11	0.4		1.19	0.79	5.95	7.14
20.8	10.15		5.26	0.75			0.75			1.13		4.14	3.38	0.38	0.38		0.38	0.75		2.63	0.38	7.52		1.13		0.38		1.88	0.75	1.13						0.75			0.75		22.56			3.01	0.75	3.76	6.02	0.38
21	8.37		4.56	0.38			0.76		0.76			4.56	3.42	0.76	0.38			1.14		3.04		11.03	0.76	0.76		1.14		1.14	0.38	0.38	0.38					2.28	0.38	0.76	0.38		27.38	0.76		2.28		5.32	4.94
21.32	19.07		4.12			1.03	2.06	0.52		0.52	0.52	1.03	3.61					1.03		3.61		17.53	0.52			0.52		0.52			0.52					1.03		0.52	0.52	0.52	13.4			1.03	0.52	1.55	2.58
22.1	7.78		11.28			0.39	0.39		0.78			0.39	6.61	0.39				1.17	0.39	2.33		15.95	0.39	2.33		0.39		1.17	0.39		1.17					1.17		0.78		0.39	17.51	0.39		2.33	0.39	6.23	1.17
23.26	5.19		17.78	1.48					4.44			4.44	8.15							0.74		11.85		0.74		0.74		0.74													5.19			2.22	0.74	4.44	11.11
24.25												33.33																8.33
25.25												13.33	20							6.67																											13.33
[truncated: 15 more columns]
