# Supplementary material for: The recolonisation of volcanically disturbed Eocene habitats of Central Europe: the maar lakes of Messel and Offenthal (SW Germany) compared
Source: Springer Nature journal article supplement (doi:10.1007/s12549-020-00425-4), 2020-07-02
Supplement: MOESM4 [file 12549_2020_425_MOESM4_ESM.xlsx]

## Sheet: Tabelle1
Maryam Moshayedi, Olaf K. Lenz, Volker Wilde and Matthias Hinderer: The recolonization of volcanically disturbed Eocene habitats of Central Europe: The maar lakes of Messel and Offenthal (SW Germany compared.
SupplementaryTable 3. Abundance percentages of variables and palynomorphs of the lakes Messel and Offenthal used for statistical analyses
		Leiotriletes	Cicatricosisporites	Trilites	Ischyosporites	Punctatisporites	Polypodiaceae (trilet)	Laevigatosporites	Verrucatosporites	Pityosporites labdacus	Cupressaceae/Taxodiaceae	Restionaceae	Emmapollis pseudoemmaensis	Monocolpopollenites tranquillus	Dicolpopollis kockeli	Hydrocharitaceae	Plicapollis pseudoexcelsus	Nudopollis terminalis	Triatriopollenites excelsus	Triatriopollenites excelsus minor	Triatriopollenites rurensis/bituitus	Plicatopollis spp.	Momipites spp.	Platycarya	Pterocarya	Carya	Subtriporopollenites spp.	Triporopollenites rhenanus	Polyporopollenites spp.	Celtis	Tiliaceae/Bombacaceae	Porocolpopollenites rarobaculatus	Labrapollis labraferus	Icacinaceae	Pentapollenites spp.	Tricolpopollenites liblarensis (Fagaceae)	Tricolpopollenites retiformis	Tricolpopollenites vegetus	Tricolporopollenites cingulum spp.	Tricolporopollenites satzveyensis/edmundi group	Tricolporopollenites marcodurensis	Tricolporopollenites microreticulat.	Tricolporopollenites parmularius	Tricolporopollenites microporitus	Tricolporopollenites sole de portai	Tricolporopollenites mansfeldensis	Tricolporopollenites quercioides	Tricolporopollenites messelensis	Tricolporopollenites belgicus?
1463	MMF top	0	0	0	0	0	0	0	0	2	0	0	0	0	0	0	15	0	2	3	2	68	0	8	5	0	1	0	2	0	0	0	13	0	0	72	0	0	30	0	2	0	1	1	0	0	0	1	0
1462	MMF top	0	0	0	0	0	1	2	0	1	1	0	2	0	0	0	14	0	0	5	2	65	2	10	2	0	0	2	1	0	1	0	5	2	0	38	1	0	76	0	1	3	1	0	0	0	0	0	0
1460	MMF top	1	0	0	0	0	1	1	1	2	0	0	2	0	0	0	10	0	1	0	3	76	1	10	1	0	0	0	2	0	1	0	7	1	1	75	1	0	21	4	1	2	2	1	0	0	0	0	0
1459	MMF top	0	0	0	0	0	0	1	0	0	1	0	0	0	0	0	5	0	1	8	3	64	1	14	0	0	1	0	5	0	1	0	9	0	1	60	0	0	54	2	0	5	2	1	0	0	0	0	0
1457	MMF top	1	0	0	0	0	2	2	0	0	0	0	0	0	0	0	6	0	1	2	1	103	0	7	4	1	1	0	3	0	0	0	7	0	1	45	1	0	42	0	0	1	4	0	0	0	0	0	0
1455	MMF top	1	0	0	0	0	0	2	1	1	0	0	2	1	0	0	11	0	0	1	1	62	1	1	5	0	0	4	2	1	0	0	8	1	0	44	2	0	60	2	1	7	0	1	1	0	0	0	0
1453	MMF top	1	0	0	0	0	0	2	0	3	0	0	1	0	0	0	8	1	1	2	1	78	4	12	2	0	0	0	0	0	0	0	3	1	2	38	1	1	58	2	0	1	2	1	0	2	0	0	0
1451	MMF top	0	0	0	0	0	1	3	0	2	0	0	1	1	0	0	12	0	3	1	1	78	0	13	1	0	0	0	0	0	0	0	6	1	2	18	0	1	80	0	2	2	2	1	0	1	0	0	0
1450	MMF top	3	0	0	0	0	0	1	0	1	0	0	2	0	0	0	8	0	0	2	0	93	1	13	4	0	0	0	1	0	0	0	9	1	0	46	1	1	34	0	3	4	2	0	0	0	0	0	0
1449	MMF top	0	0	0	0	0	0	3	0	1	0	0	0	0	0	0	6	0	1	3	1	73	1	14	4	0	1	0	4	0	0	0	10	0	0	27	3	2	80	0	0	0	1	1	1	0	0	0	0
1445	MMF top	0	0	0	0	0	0	0	0	2	0	0	0	0	0	0	17	0	0	3	3	70	3	13	1	0	0	0	2	0	0	0	7	0	1	19	1	0	74	0	1	2	3	1	0	0	0	0	0
1443	MMF top	0	0	0	0	0	0	1	2	1	1	0	1	0	0	0	10	0	0	2	1	79	0	20	1	0	1	0	1	2	0	0	5	0	0	52	2	1	35	0	0	3	4	0	1	0	0	0	0
1441	MMF top	0	3	0	1	0	0	0	0	2	1	0	1	0	0	0	4	0	4	6	2	63	1	7	2	0	1	0	1	0	0	0	2	0	2	6	1	0	97	1	1	4	6	1	0	0	0	0	0
1439	MMF top	4	0	0	0	0	0	1	0	1	0	0	1	0	0	0	8	0	0	1	1	57	1	7	3	0	1	1	4	1	0	0	4	0	1	22	4	1	86	2	0	8	1	0	1	0	0	0	0
1437	MMF top	0	0	0	0	0	0	0	1	6	0	0	0	0	0	0	11	0	1	1	0	50	0	14	1	1	2	0	0	4	0	0	3	0	1	36	3	0	81	0	0	7	1	0	0	1	0	1	0
1435	MMF top	0	0	0	0	0	0	1	1	4	3	0	1	3	0	0	8	0	0	2	2	69	2	8	0	0	3	0	0	14	0	0	8	0	0	8	1	2	70	1	0	5	0	1	1	0	0	0	0
1433	MMF top	1	0	0	0	0	0	0	1	12	1	0	0	2	0	0	3	0	1	1	4	78	5	13	0	0	1	0	1	0	0	0	8	0	0	42	2	2	55	0	2	3	1	1	0	0	0	0	0
1431	MMF top	1	0	0	0	0	0	1	0	15	1	0	1	0	0	0	4	0	1	0	1	86	2	14	5	0	0	1	1	0	2	0	4	0	0	49	3	1	49	0	0	4	0	1	1	0	1	0	0
1427	MMF top	0	0	0	0	0	0	3	0	9	1	0	1	3	0	0	4	0	0	0	0	86	3	5	2	0	0	1	1	1	0	0	5	0	0	65	1	2	25	3	3	2	2	0	0	1	1	0	0
1425	MMF top	0	0	0	0	0	0	2	0	1	0	0	0	1	0	0	3	0	3	0	1	109	3	10	7	0	1	1	0	0	0	0	6	0	0	44	0	1	44	1	1	2	1	0	0	0	0	1	0
1423	MMF top	0	0	0	0	0	0	0	0	7	1	0	1	0	0	0	4	0	0	0	0	99	2	23	0	0	0	1	1	0	0	0	8	1	1	58	1	1	10	0	2	3	2	5	1	0	0	0	1
1421	MMF top	3	0	0	0	0	0	0	0	5	0	0	1	1	0	0	1	0	1	1	0	91	0	15	4	0	0	1	1	1	0	0	5	0	1	43	0	2	45	2	0	1	0	2	0	0	0	0	0
1419	MMF top	0	0	0	0	0	0	0	1	10	1	0	0	3	0	0	8	0	0	1	1	64	4	13	2	0	0	0	8	1	0	0	6	0	0	42	1	7	52	0	0	6	0	1	1	0	1	0	0
1417	MMF top	1	0	0	0	0	0	6	0	2	0	0	0	0	0	1	1	0	1	1	1	83	2	13	1	0	1	0	0	0	0	0	4	0	0	21	0	0	80	6	2	1	3	1	0	0	0	0	0
1415	MMF top	0	0	0	0	0	2	1	0	9	0	0	3	1	0	1	9	0	0	1	0	62	0	23	1	0	0	1	1	0	0	0	4	1	0	59	3	5	37	0	1	4	1	2	0	1	1	0	0
1411	MMF top	4	0	0	0	0	0	0	0	8	1	0	1	0	0	0	19	0	0	0	0	98	1	16	0	0	3	1	0	0	1	0	0	0	1	19	0	0	62	1	0	2	1	0	0	0	0	0	0
1407	MMF top	0	0	0	0	0	0	1	0	14	2	0	2	1	0	0	9	0	1	3	2	76	1	10	1	0	0	0	0	2	0	0	3	0	1	54	0	1	55	0	2	3	2	0	0	0	0	0	1
1405	MMF top	1	0	0	0	0	0	0	0	12	3	0	2	2	0	0	7	0	1	3	0	78	0	14	4	0	0	0	1	1	1	0	9	0	1	71	2	0	25	0	0	3	1	0	0	0	0	0	0
1403	MMF top	3	0	0	0	0	0	0	1	23	1	0	3	0	0	0	7	0	0	2	0	79	1	7	2	0	2	0	0	1	0	0	2	0	2	47	3	2	42	0	1	3	0	0	1	0	0	0	0
1401	MMF top	0	0	0	0	0	0	0	0	16	1	0	1	0	0	0	6	0	0	4	3	88	6	11	4	0	0	0	0	0	0	0	0	0	0	63	0	5	18	0	1	3	1	2	0	0	0	0	0
1397	MMF top	0	0	0	0	0	0	2	0	10	0	0	3	0	0	0	6	0	0	0	2	96	0	13	0	0	0	0	0	0	0	0	6	0	0	72	0	3	19	1	2	3	1	3	0	0	1	0	0
1395	MMF top	0	0	0	0	0	0	3	0	7	0	0	2	1	0	0	6	0	1	0	0	93	0	13	0	0	1	0	0	0	0	0	3	0	0	54	3	0	36	0	4	2	5	3	1	0	0	0	1
1391	MMF top	0	0	0	0	0	0	3	2	2	2	0	1	0	0	0	5	0	0	0	0	67	4	10	3	0	0	5	0	1	1	0	8	1	1	45	2	5	76	0	0	2	2	2	1	1	0	0	0
1389	MMF top	0	0	0	0	0	0	2	0	1	1	0	2	1	0	0	3	0	0	2	1	71	0	13	3	0	1	3	0	0	0	0	11	1	0	45	1	1	60	1	0	2	3	2	0	0	1	0	0
1385	MMF top	0	0	0	0	0	0	1	0	2	0	0	1	1	0	0	6	0	1	4	0	68	5	12	3	0	0	0	0	0	1	0	4	0	0	52	0	0	54	0	1	3	1	0	0	0	1	0	0
1383	MMF top	0	0	0	0	0	0	1	0	2	1	0	0	0	0	1	6	0	0	1	0	102	0	6	2	0	2	0	0	1	2	0	6	1	0	60	1	0	9	0	4	5	3	5	0	0	0	0	0
1381	MMF top	0	0	0	0	0	0	0	0	0	1	0	1	1	0	0	7	0	2	1	2	72	0	7	1	1	1	1	1	1	0	0	10	0	0	22	1	1	83	0	2	5	0	1	1	0	1	0	0
1379	MMF top	1	0	0	0	0	0	3	0	4	1	0	0	0	0	0	11	0	0	1	1	75	2	9	3	0	1	0	0	0	2	0	5	0	0	78	0	1	33	2	4	3	2	0	0	0	0	0	0
1377	MMF top	1	0	0	0	0	0	3	0	6	3	0	0	1	0	0	7	0	1	2	1	63	0	9	2	0	2	1	7	0	1	0	3	1	0	36	4	0	65	0	0	7	2	0	0	0	1	0	0
1375	MMF top	0	0	0	0	0	0	2	1	4	3	0	0	0	0	1	4	0	0	0	0	94	2	12	0	0	2	0	4	3	0	0	2	0	0	55	1	0	22	4	2	3	3	3	2	0	1	0	0
1373	MMF top	0	0	0	0	0	0	1	0	4	2	0	0	2	0	0	5	0	0	4	0	96	6	9	1	1	1	0	1	1	0	0	3	0	1	23	1	2	59	1	0	4	0	1	0	0	0	0	0
1371	MMF top	5	0	0	0	0	0	0	1	4	2	0	2	0	0	0	5	0	2	0	2	66	4	4	2	0	0	0	1	0	2	0	9	0	2	58	3	1	47	0	1	2	2	1	0	0	1	0	0
1369	MMF top	0	0	0	0	0	0	2	1	11	0	0	0	0	0	1	7	0	0	1	0	69	1	11	2	0	1	1	0	2	0	0	11	0	0	42	5	3	59	1	3	3	1	0	0	0	2	0	0
1367	MMF top	1	0	0	0	0	0	2	0	17	5	0	3	0	0	0	3	0	0	0	0	79	2	13	2	1	1	3	0	3	1	1	2	0	0	49	5	3	53	1	1	5	3	3	0	0	0	0	0
1365	MMF top	0	0	0	0	0	0	1	1	5	6	0	3	0	0	0	4	0	0	1	1	70	1	18	1	0	0	3	0	0	0	0	2	0	3	44	0	2	53	1	3	6	4	3	0	0	2	0	0
1363	MMF top	2	0	0	0	0	0	2	0	4	1	0	2	0	0	0	3	0	1	0	1	87	3	8	1	0	0	1	1	3	1	0	2	1	1	62	0	3	38	1	0	10	1	0	0	0	1	0	0
1361	MMF top	0	0	0	0	0	0	3	2	1	0	0	1	0	0	0	9	0	0	1	0	81	4	12	2	0	0	1	0	0	1	0	3	0	1	77	3	0	36	3	0	4	3	4	0	0	0	0	0
1359	MMF top	0	0	0	0	0	0	0	0	11	1	0	2	0	0	0	5	0	1	0	2	58	1	18	2	0	1	0	1	1	0	0	7	0	1	76	3	1	37	0	3	2	3	2	0	0	1	0	1
1357	MMF top	0	0	0	0	0	0	1	0	5	0	0	1	0	0	0	7	0	0	0	4	56	3	12	0	0	1	0	0	1	0	0	4	0	2	63	4	0	71	1	2	4	4	4	1	0	0	0	0
1355	MMF top	2	0	0	0	0	0	1	1	12	2	0	2	0	0	0	9	0	1	0	0	77	2	19	0	0	3	0	1	1	0	0	3	1	1	57	2	1	32	2	0	2	1	1	1	0	1	0	0
1353	MMF top	1	0	0	0	0	0	2	1	8	0	0	1	0	0	0	18	0	0	2	1	53	2	11	1	0	2	2	0	0	1	0	7	0	0	42	0	1	57	1	3	6	1	2	0	0	1	0	0
1351	MMF top	3	0	0	0	0	1	1	1	13	2	0	3	0	0	0	10	0	0	3	1	96	2	12	3	0	0	0	1	0	1	0	6	1	1	81	0	2	11	0	1	7	3	2	0	0	0	0	0
1349	MMF top	10	0	0	0	0	0	2	0	12	1	0	1	0	0	0	9	0	2	0	0	71	1	8	4	0	1	1	0	0	0	1	8	0	0	17	2	2	77	2	0	1	1	2	2	0	2	0	0
1347	MMF top	6	0	0	0	0	0	4	0	29	3	0	2	0	0	0	5	0	1	0	3	61	1	13	3	0	0	0	1	3	4	0	6	0	0	59	0	0	29	1	3	1	0	2	1	0	1	0	1
1345	MMF top	1	0	0	0	0	0	1	0	9	0	0	2	0	0	0	18	0	2	3	1	83	2	22	2	0	0	2	3	1	0	0	8	1	1	42	1	4	16	1	0	3	0	2	0	0	0	1	0
1343	MMF top	0	0	0	0	0	0	3	0	13	2	0	5	0	0	0	13	0	0	1	0	90	0	4	3	0	0	0	1	0	0	0	4	0	1	27	0	3	43	3	1	2	1	1	1	0	0	0	0
1341	MMF top	0	0	0	0	0	0	1	1	15	0	0	1	0	0	0	13	0	0	1	0	63	2	15	8	0	1	1	3	0	0	1	4	0	3	14	1	1	71	1	1	4	1	0	1	0	0	0	0
1339	MMF top	1	0	0	0	0	0	1	0	11	0	0	3	0	0	0	12	0	0	1	1	120	2	19	4	0	2	0	6	0	2	0	5	0	0	44	1	5	6	2	1	3	2	1	0	0	0	0	1
1337	MMF top	1	0	0	0	0	1	4	0	6	4	0	3	1	0	0	10	0	0	1	1	69	2	16	7	0	0	1	13	1	0	0	2	0	0	34	3	1	48	0	0	6	2	0	3	0	0	0	0
1335	MMF top	0	0	0	0	0	0	0	0	7	0	0	0	0	0	0	6	0	0	1	1	100	0	19	0	0	0	0	1	1	1	0	7	0	0	83	2	2	10	0	0	3	0	0	1	0	0	0	4
1333	MMF top	0	0	0	0	0	0	1	0	5	0	0	5	0	0	0	8	0	1	2	0	73	4	13	0	0	1	0	4	0	0	0	9	0	0	12	1	1	76	1	2	8	2	2	0	0	0	1	0
1331	MMF top	0	0	0	0	0	0	1	0	9	1	0	6	1	0	0	6	0	0	3	0	76	3	6	7	0	1	0	2	1	0	0	3	0	0	36	1	1	69	0	1	2	2	2	0	0	0	0	0
1329	MMF top	0	0	0	0	0	0	1	0	3	0	0	0	0	0	0	15	0	1	0	2	65	3	9	4	0	1	1	4	0	0	0	8	0	2	52	2	1	46	0	0	6	4	1	1	0	0	1	0
1325	MMF top	3	0	0	0	0	1	1	0	8	0	0	0	1	0	0	4	0	3	2	2	69	3	15	1	0	2	1	3	1	0	0	3	1	3	32	2	2	57	0	0	2	0	0	0	0	1	0	0
1323	MMF top	1	0	0	0	0	1	1	1	13	5	0	6	1	0	0	9	0	0	0	1	66	2	26	3	1	0	2	0	0	0	0	3	0	1	29	3	3	42	1	3	4	2	2	2	0	0	0	0
1321	MMF top	1	0	0	0	0	0	0	0	9	0	0	4	0	0	0	17	0	0	1	1	85	1	8	1	0	0	0	1	1	0	0	9	0	1	34	0	2	70	2	0	1	1	1	1	0	1	0	0
1319	MMF top	0	0	0	0	0	0	2	0	6	0	0	0	0	0	1	13	0	1	1	0	73	2	16	2	0	0	0	3	0	0	0	4	0	1	82	2	1	25	0	1	6	2	1	0	0	0	1	0
1317	MMF top	1	0	0	0	0	0	0	0	19	2	0	1	0	0	0	12	0	1	2	2	95	3	11	0	0	0	1	4	0	0	0	1	1	0	16	0	2	76	1	0	5	1	3	0	0	0	0	0
1315	MMF top	5	0	0	0	0	0	0	0	19	2	0	7	0	0	0	9	0	0	1	3	71	3	14	2	0	0	0	9	0	0	0	10	0	1	60	2	3	21	0	3	2	2	0	1	0	1	0	0
1313	MMF top	0	0	0	0	0	0	1	0	14	1	0	2	1	0	0	12	0	0	2	1	94	2	10	2	0	1	0	3	0	0	0	2	0	1	16	0	1	71	1	2	0	0	0	1	2	0	1	0
1312	MMF top	16	0	0	0	0	0	2	0	12	4	0	2	1	0	0	14	0	0	2	1	84	5	3	0	0	1	2	0	1	0	0	2	0	1	27	3	2	41	0	1	3	1	0	1	0	0	0	0
1311	MMF top	2	0	0	0	0	0	1	1	15	2	1	2	0	0	0	5	0	6	4	1	55	2	16	0	0	1	0	4	0	1	1	8	0	0	67	0	3	32	0	0	3	4	0	2	0	0	1	0
1310	MMF top	2	0	0	0	0	0	1	0	9	0	0	0	0	0	0	8	0	0	2	0	65	1	18	0	0	0	0	4	0	2	0	5	0	1	19	2	3	89	0	1	1	0	1	1	0	0	0	0
1309	MMF top	1	0	0	0	0	0	1	0	21	1	0	1	0	0	0	10	0	1	1	0	69	2	9	1	0	0	0	4	0	0	0	3	1	2	36	4	3	57	0	0	6	3	1	0	0	0	0	0
1308	MMF top	0	0	0	0	0	0	4	0	8	0	0	7	1	0	0	7	0	0	7	0	52	5	10	0	0	1	0	3	0	2	0	3	1	1	10	3	2	78	1	1	9	1	4	2	0	0	0	0
1307	MMF top	1	0	0	0	0	0	1	0	17	2	0	2	0	0	0	0	0	3	3	1	66	5	19	0	0	0	0	3	0	2	0	5	0	0	34	0	1	41	1	0	4	3	2	1	0	0	1	1
1306	MMF top	0	0	0	0	0	1	5	1	25	1	0	4	0	0	0	9	0	0	2	0	68	1	7	0	0	0	0	4	0	1	0	2	0	0	17	1	4	76	0	1	2	1	0	0	0	0	1	0
1304	MMF top	0	0	0	0	0	0	2	0	6	1	0	6	0	0	0	3	0	1	0	0	84	2	7	0	0	0	1	4	2	0	0	5	1	1	5	2	4	78	1	0	7	0	0	2	0	0	0	0
1303	MMF top	1	0	0	0	0	0	0	0	13	1	0	2	0	0	0	2	0	1	3	2	79	2	18	1	0	0	0	9	0	0	0	7	1	1	69	0	1	25	0	2	0	2	1	0	0	0	2	2
1302	MMF top	1	0	0	0	0	0	1	0	16	1	0	4	1	0	1	8	0	0	2	0	83	0	10	1	0	0	2	6	1	1	1	3	0	0	6	1	1	87	0	0	2	1	0	1	0	0	0	0
1301	MMF top	0	0	0	0	0	0	2	0	12	2	0	1	0	0	0	8	0	0	1	0	85	1	16	0	0	1	0	5	1	0	0	6	0	1	21	1	2	68	1	1	3	0	0	0	0	0	0	0
1300	MMF top	0	0	0	0	0	0	0	0	9	0	0	3	0	0	0	9	0	0	2	0	72	1	9	1	0	0	0	3	0	1	0	4	0	0	11	0	4	89	1	1	3	2	1	1	0	0	0	0
1299	MMF top	0	0	0	0	0	1	3	1	12	3	0	2	1	0	0	8	0	3	1	1	83	2	20	2	0	0	2	4	1	0	0	1	0	0	33	3	3	31	2	3	3	0	1	1	1	0	1	1
1298	MMF top	0	0	0	0	0	0	1	0	12	1	0	2	0	0	0	6	0	1	3	1	71	1	15	1	1	0	0	4	0	0	0	2	1	1	13	1	2	86	0	0	4	0	0	1	0	0	0	0
1297	MMF top	0	0	0	0	0	0	2	0	5	1	0	1	0	0	0	8	0	0	0	0	83	3	12	2	0	0	0	1	0	0	0	3	0	1	31	4	2	54	0	1	1	1	0	0	1	0	0	0
1296	MMF top	1	0	0	0	0	2	3	0	10	1	0	3	0	0	0	11	0	0	5	0	79	1	14	0	0	0	1	2	2	1	1	3	0	1	35	2	2	46	0	1	2	2	1	1	1	0	0	0
1295	MMF top	1	0	0	0	0	0	0	0	10	1	0	1	1	0	0	10	0	1	1	0	84	0	12	0	0	2	1	3	0	0	0	5	0	0	85	3	2	12	0	1	2	1	3	0	0	0	0	0
1294	MMF top	0	0	0	0	0	1	2	0	21	7	0	2	0	0	0	15	0	2	4	0	75	0	7	1	0	1	0	1	1	0	0	2	1	1	31	3	0	43	0	0	8	0	0	2	0	0	0	0
1293	MMF top	1	0	0	0	0	0	0	0	9	2	0	1	1	0	0	11	0	0	1	1	82	4	20	0	0	0	0	8	0	0	0	6	1	1	11	1	1	87	1	0	5	2	2	2	0	0	0	0
1292	MMF top	0	0	0	0	0	0	1	0	20	1	0	2	0	0	0	11	0	2	2	1	73	0	8	3	0	0	0	4	0	0	0	1	0	0	33	1	2	61	0	0	5	1	1	1	0	0	1	0
1291	MMF top	0	0	0	0	0	0	0	0	11	3	0	0	0	0	1	11	0	0	7	1	87	1	23	1	1	0	0	1	0	0	0	3	0	0	61	3	3	11	0	0	5	1	1	1	0	0	0	1
1290	MMF top	1	0	0	0	0	0	0	0	12	1	0	0	0	0	0	16	0	1	5	2	85	0	11	1	0	0	1	1	0	1	0	4	0	0	31	1	2	50	0	1	4	2	0	0	0	0	1	0
1287	MMF top	0	0	0	0	0	0	0	0	13	1	0	2	3	0	0	12	0	2	1	1	117	3	12	1	0	0	1	2	0	4	1	5	0	1	50	0	1	3	1	1	2	1	0	0	0	0	0	0
1286	MMF top	0	0	0	0	0	1	0	0	13	2	0	1	1	0	0	8	0	1	3	0	92	0	8	0	0	0	0	5	0	0	0	1	0	0	64	1	1	23	0	0	4	2	0	0	0	0	2	0
1285	MMF top	0	0	0	0	0	0	2	1	12	2	0	0	0	0	0	12	1	0	3	1	110	2	11	1	0	0	0	3	0	1	0	2	1	0	12	2	2	69	1	0	4	2	0	0	0	0	0	0
1284	MMF top	1	0	0	0	0	0	2	0	12	1	0	2	1	0	0	9	0	1	6	1	93	1	10	0	0	0	0	1	1	0	0	7	0	0	1	2	0	75	0	1	7	1	0	0	0	0	0	0
1283	MMF top	0	0	0	0	0	0	4	0	11	4	0	0	0	0	0	7	1	5	1	1	83	2	6	0	0	1	0	1	1	1	0	1	0	0	46	0	4	48	0	1	5	2	0	0	0	0	0	1
1282	MMF top	0	0	0	0	0	0	0	0	28	0	0	0	0	0	0	11	0	0	2	0	89	3	2	0	0	0	0	3	1	0	0	4	1	0	8	4	3	69	0	1	1	2	1	2	0	1	2	0
1280	MMF top	1	0	0	0	0	0	5	0	17	7	0	0	0	0	0	8	0	2	0	0	83	1	4	1	0	0	2	0	0	0	0	0	0	0	10	4	3	84	1	0	5	2	0	1	1	1	0	0
1279	MMF top	0	0	0	0	0	0	3	0	8	0	0	0	1	0	0	3	0	0	0	0	110	2	10	0	0	0	1	0	1	0	1	4	0	2	65	3	1	14	0	2	1	0	1	0	0	0	1	0
1278	MMF top	0	0	0	0	0	0	0	0	6	4	0	4	0	0	0	3	0	2	0	1	76	1	8	0	0	0	1	0	0	1	0	4	0	1	4	2	0	97	2	1	7	1	0	1	1	0	0	0
1277	MMF top	0	0	0	0	0	0	2	0	5	1	0	1	1	0	0	6	0	0	0	0	124	1	10	0	0	0	2	1	1	0	0	4	0	0	38	2	0	34	0	1	0	2	3	0	0	0	0	0
1276	MMF top	1	0	0	0	0	0	3	2	11	1	0	2	0	0	0	5	0	0	1	0	94	4	6	1	0	0	1	1	0	0	0	4	0	0	2	1	1	75	6	2	4	0	1	2	0	0	0	0
1275	MMF top	1	0	0	0	0	0	3	0	9	0	0	0	0	0	0	3	0	1	0	1	112	0	16	1	0	0	0	1	3	2	0	4	0	1	50	3	0	21	1	1	7	1	3	0	0	0	1	0
1274	MMF top	3	0	0	0	0	1	4	2	11	2	0	8	0	0	0	2	0	1	0	0	75	1	5	4	0	0	2	0	0	1	0	4	1	1	5	0	4	90	0	0	5	0	1	0	0	0	2	0
1273	MMF top	1	0	0	0	0	0	2	0	11	3	0	1	1	0	1	3	0	0	0	0	92	2	20	0	0	2	0	0	1	1	0	2	0	0	17	4	1	54	3	2	1	1	1	0	1	0	0	0
1272	MMF top	1	0	0	0	0	0	4	0	6	0	0	0	0	0	0	4	0	0	0	0	100	4	10	3	0	0	1	0	3	0	1	5	0	1	4	2	5	78	0	1	1	2	0	2	0	0	4	0
1271	MMF top	0	0	0	0	0	0	1	0	6	0	0	2	0	0	0	2	0	3	1	1	112	2	12	1	0	0	1	0	1	1	0	3	1	0	58	2	1	26	0	1	3	1	6	0	0	1	0	0
1270	MMF top	0	0	0	0	0	0	0	0	15	3	0	5	1	0	0	5	0	2	5	0	80	1	14	0	0	0	1	0	0	0	0	1	1	3	4	0	0	84	0	0	4	1	1	0	1	0	3	0
1269	MMF top	0	0	0	0	0	0	1	0	6	2	0	0	0	0	0	5	0	0	2	0	99	1	19	0	0	2	1	0	2	0	0	2	0	1	20	1	2	60	0	1	1	2	4	0	2	0	0	0
1268	MMF top	0	0	0	0	0	0	0	0	5	3	0	3	0	0	0	5	1	0	1	2	87	3	8	3	0	0	0	0	0	0	0	9	5	1	12	0	7	74	1	1	4	2	0	1	1	0	0	0
1267	MMF top	1	0	0	0	0	0	1	0	7	2	0	2	1	0	0	3	0	0	1	3	100	1	13	2	0	2	1	0	0	4	0	1	0	1	47	3	1	21	1	1	5	1	0	1	0	0	3	1
1266	MMF top	0	0	0	0	0	1	1	0	7	0	0	1	1	0	0	4	0	0	1	0	84	2	13	2	0	1	0	0	0	0	0	1	1	2	9	3	2	82	2	2	1	1	4	0	0	1	0	0
1265	MMF top	0	0	0	0	0	1	3	0	4	1	0	1	0	0	0	10	0	0	0	2	93	1	22	1	0	0	2	0	1	2	0	5	2	0	11	2	0	78	3	0	0	3	1	0	0	0	1	0
1264	MMF top	2	0	0	0	0	0	0	0	12	8	0	4	2	0	0	9	0	0	5	1	57	2	15	0	0	1	2	1	0	0	0	3	0	2	14	5	2	70	0	1	5	0	1	0	0	0	3	0
1263	MMF top	1	0	0	0	0	0	1	0	10	2	0	1	0	0	0	5	0	3	0	3	115	0	15	0	0	1	0	0	0	0	0	4	0	1	18	1	3	60	2	5	2	4	0	1	0	0	2	0
1262	MMF top	1	0	0	0	0	1	0	0	16	2	0	3	0	0	0	6	0	0	3	0	93	1	16	2	0	0	0	0	0	0	0	8	0	1	5	1	4	65	1	0	5	0	0	0	1	0	0	0
1261	MMF top	1	0	0	0	0	0	0	0	12	1	0	2	0	0	0	12	0	0	2	0	92	3	11	2	0	0	0	2	1	1	0	4	0	0	5	1	4	79	0	1	6	0	1	0	0	0	1	0
1260	MMF top	2	0	0	0	0	0	1	0	12	2	0	4	0	0	0	11	0	3	4	0	74	3	12	1	0	0	0	0	2	0	0	3	0	0	9	0	1	74	2	0	1	1	3	0	1	0	1	0
1259	MMF top	1	0	0	0	0	0	0	0	8	0	0	3	0	0	1	0	0	6	4	0	98	1	9	0	0	0	1	2	0	0	0	7	0	0	21	0	0	65	0	3	4	1	0	0	1	0	0	0
1258	MMF top	2	0	0	0	0	0	2	0	6	3	0	1	0	0	0	22	0	0	1	0	81	1	7	1	0	0	0	1	0	1	1	2	0	0	13	2	4	83	1	1	5	2	0	0	0	0	3	0
1257	MMF top	0	0	1	0	0	0	1	0	7	1	0	0	0	0	0	16	0	2	1	2	108	4	9	2	0	0	0	5	0	0	1	4	0	0	31	1	0	39	0	0	10	0	1	1	0	1	2	0
1256	MMF top	1	0	0	0	0	0	1	0	12	1	0	1	0	0	0	10	0	2	3	1	80	3	12	1	0	0	2	3	0	0	0	2	0	3	3	0	0	80	1	0	9	0	1	0	1	0	1	0
1254	MMF top	4	0	0	0	0	0	1	0	12	3	0	1	0	0	0	5	0	0	1	0	86	2	9	0	0	1	0	2	0	0	0	7	0	0	3	2	3	70	1	0	14	2	0	0	2	0	0	0
1253	MMF top	6	0	0	0	0	0	0	0	15	1	0	0	0	0	0	10	0	2	2	2	91	0	14	1	0	0	0	6	0	1	0	11	0	3	49	1	0	28	1	0	2	0	1	0	0	0	2	0
1252	MMF top	0	0	0	0	0	0	1	0	14	1	0	1	0	0	0	9	0	2	6	0	95	4	4	0	1	1	0	1	0	0	0	3	0	1	2	0	2	78	1	2	3	1	2	0	2	0	1	0
1251	MMF top	1	0	0	0	0	0	4	0	16	0	0	3	1	0	0	7	0	1	0	1	103	2	9	0	0	3	0	4	0	0	0	2	0	0	22	1	7	47	2	1	6	2	0	0	0	0	1	0
1250	MMF top	0	0	0	0	0	0	2	1	15	3	0	1	0	0	0	10	0	2	3	0	72	2	5	0	0	0	1	4	1	0	0	5	0	0	8	2	9	70	2	4	8	1	1	1	0	0	1	0
1249	MMF top	0	0	0	0	0	0	3	1	1	3	0	1	0	0	0	13	0	0	0	1	106	4	11	2	0	1	0	1	0	0	0	4	0	0	6	0	2	69	2	1	2	3	1	4	1	0	0	0
1248	MMF top	0	0	1	0	0	0	0	1	10	5	0	2	1	0	2	9	0	0	3	1	87	1	9	0	0	0	0	5	1	0	0	3	0	0	2	1	2	75	0	2	6	4	2	0	0	0	1	0
1246	MMF top	0	0	0	0	0	0	1	0	10	1	0	1	0	0	0	7	0	3	2	2	89	1	12	0	0	0	0	5	0	0	0	6	0	0	12	0	5	66	0	0	9	1	0	0	0	0	0	0
1245	MMF top	1	0	0	0	0	0	1	0	8	0	0	2	0	0	0	9	0	2	1	2	116	2	14	1	0	0	1	2	0	0	0	5	0	0	17	0	0	73	4	0	5	0	0	2	0	0	1	0
1244	MMF top	1	0	0	0	0	3	2	1	9	0	0	2	0	0	0	0	0	1	1	0	93	2	11	1	0	0	0	3	1	0	0	4	0	1	4	3	0	67	0	0	9	1	3	0	1	0	0	0
1243	MMF top	0	0	0	0	0	0	1	1	8	3	0	2	0	0	0	4	0	0	2	2	132	3	15	0	0	0	0	2	0	0	0	7	0	1	35	0	2	44	0	0	4	0	0	0	0	0	1	1
1242	MMF top	0	0	0	0	0	0	2	0	10	3	0	1	0	0	1	5	0	1	7	0	79	2	13	1	0	0	0	4	0	0	0	3	0	0	1	0	2	85	1	2	6	1	0	0	0	0	2	0
1240	MMF top	0	0	0	0	0	0	0	0	6	0	0	2	0	0	0	8	0	1	5	2	91	1	14	1	1	0	1	3	1	0	0	4	0	3	4	1	4	76	0	1	8	0	0	1	0	0	0	0
1239	MMF top	0	0	0	0	0	0	0	1	7	1	0	0	0	0	0	6	0	3	7	3	106	6	9	1	0	0	0	3	0	0	0	8	0	0	44	0	3	25	0	2	6	3	2	4	0	0	0	0
1238	MMF top	1	0	0	0	0	2	0	0	15	1	0	0	1	0	0	10	0	0	7	1	85	1	12	2	0	1	1	6	0	0	0	2	0	0	2	0	0	70	0	0	1	0	0	0	0	0	0	0
1237	MMF top	0	0	0	0	0	0	0	0	9	0	0	0	1	0	1	11	0	3	1	2	108	1	15	2	1	0	1	5	1	0	0	5	0	0	37	3	1	49	0	1	3	3	0	0	0	0	1	0
1236	MMF top	0	0	0	0	0	1	0	0	14	1	0	1	0	0	0	9	0	1	10	3	95	4	6	1	0	2	0	3	1	0	0	6	0	0	2	1	3	52	1	0	9	2	0	3	1	0	1	0
1235	MMF top	1	0	0	0	0	1	0	0	13	1	0	2	0	0	0	3	0	4	8	3	99	1	7	1	0	2	0	8	0	0	0	7	0	0	25	0	1	39	1	0	0	3	2	0	0	0	0	0
1234	MMF top	7	0	0	0	0	0	1	0	12	1	0	0	0	0	1	10	0	0	1	0	81	1	8	2	0	0	1	2	0	0	0	2	0	0	3	3	16	64	0	0	4	1	1	0	0	0	0	0
1233	MMF top	1	0	0	0	0	0	1	1	10	0	0	1	1	0	0	15	0	1	3	0	125	0	6	1	0	1	0	1	0	0	0	1	1	1	34	2	1	22	0	2	2	1	1	0	1	0	0	0
1232	MMF top	5	0	0	0	0	0	1	1	17	0	0	1	0	0	0	15	0	2	3	0	91	2	8	0	0	1	0	8	1	0	0	6	0	1	5	1	7	42	0	1	8	0	1	1	0	0	1	0
1230	MMF top	6	0	1	0	0	0	1	1	16	3	0	0	0	0	0	9	0	1	4	0	84	2	5	1	0	0	1	7	1	1	0	7	0	4	10	1	6	58	3	1	0	2	0	2	0	0	0	0
1229	MMF top	0	0	0	0	0	0	0	0	12	0	0	0	1	0	0	19	0	3	3	1	112	0	23	1	1	0	0	10	0	0	0	7	0	1	36	0	0	13	0	0	2	3	2	0	0	1	0	0
1228	MMF top	5	0	0	0	0	1	2	0	9	2	0	1	0	0	1	3	0	4	0	2	88	1	9	0	0	1	1	2	0	1	0	9	0	1	5	2	6	67	1	1	3	3	0	3	0	0	0	0
1227	MMF top	2	0	0	0	0	1	2	1	8	5	2	1	3	0	2	12	0	2	0	1	72	2	20	3	0	0	1	23	2	0	0	10	0	1	24	0	4	50	0	2	3	3	0	1	1	1	0	0
1226	MMF top	0	0	0	0	0	0	0	0	4	0	0	0	0	0	0	5	0	1	3	1	74	0	8	0	0	0	1	17	2	0	0	1	0	0	6	0	4	97	3	1	6	5	0	1	0	0	0	0
1224	MMF top	2	0	1	0	0	1	3	0	12	5	0	4	0	0	0	9	0	1	7	1	84	0	8	2	1	1	1	7	0	0	0	6	0	0	8	1	3	56	3	0	3	2	0	2	0	0	0	0
1222	MMF top	1	0	2	0	0	0	1	0	6	1	0	4	0	0	0	15	0	1	2	0	77	4	9	4	0	0	1	10	2	0	0	11	0	0	11	1	1	60	0	1	8	1	0	0	0	0	0	0
1220	MMF top	1	0	0	0	0	1	0	0	9	1	0	5	1	0	0	14	0	6	6	0	84	2	11	0	0	0	1	12	1	0	0	2	0	3	6	1	2	68	1	0	1	1	0	1	0	0	0	0
1219	MMF top	0	0	0	0	0	1	0	1	5	0	0	0	2	0	0	10	0	7	3	0	93	3	15	2	0	0	0	11	0	0	0	4	1	1	70	2	3	16	1	0	3	1	1	0	0	0	0	1
1217	MMF top	0	0	0	0	0	0	1	0	12	1	0	0	0	0	0	8	0	0	5	0	93	2	19	3	0	0	0	17	0	0	0	4	0	1	52	0	1	20	0	1	7	4	1	1	0	0	0	0
1216	MMF top	0	0	0	0	0	1	0	0	8	1	0	0	0	0	0	21	0	3	5	0	91	1	8	0	2	1	2	6	2	1	0	3	0	0	12	0	1	69	2	2	0	1	0	0	0	0	1	0
1213	MMF top	0	0	0	0	0	0	3	0	7	1	0	2	0	0	0	17	0	0	2	0	101	1	9	1	0	0	0	9	0	0	0	3	0	0	71	0	4	22	0	0	1	3	2	1	0	0	0	0
1212	MMF top	1	0	0	0	0	1	1	1	7	2	0	3	1	0	0	3	0	0	2	1	105	4	13	1	0	0	2	13	1	0	0	4	0	0	34	0	6	21	0	0	5	1	5	0	0	0	0	0
1211	MMF top	0	0	0	0	0	0	0	0	5	1	0	1	0	0	0	6	0	1	3	0	98	0	6	3	0	2	0	24	0	1	0	2	1	0	27	0	4	47	0	0	1	4	1	0	0	0	1	0
1209	MMF top	1	0	0	0	0	1	1	0	5	2	1	2	1	0	0	11	0	4	3	6	92	2	26	4	1	0	1	16	1	0	0	2	2	1	63	1	2	37	2	0	7	2	0	0	0	0	0	0
1208	MMF top	1	0	0	0	0	1	1	0	4	0	0	2	0	0	0	9	0	0	2	2	102	1	7	0	0	0	1	6	1	1	0	3	0	0	53	2	4	13	2	0	3	1	2	0	0	0	1	0
1207	MMF top	0	0	0	0	0	1	4	0	6	1	0	0	1	0	0	11	0	0	2	0	85	0	12	1	0	0	1	8	0	0	0	2	0	0	33	0	3	57	0	0	2	4	1	0	0	0	1	0
1206	MMF top	0	0	0	0	0	0	0	0	7	2	0	1	0	0	0	12	0	1	6	1	96	2	9	4	0	0	0	5	0	1	0	5	0	0	79	2	0	6	0	0	7	3	1	1	0	0	0	0
1204	MMF top	1	0	0	0	0	0	2	0	8	2	0	0	1	0	0	17	1	0	3	2	85	3	1	2	0	0	0	10	0	0	0	3	0	1	24	4	1	53	1	0	2	2	1	1	0	2	0	0
1200	MMF top	0	0	0	0	0	0	4	1	7	3	0	0	0	0	0	10	0	0	0	3	102	1	12	0	0	0	1	8	2	0	0	3	0	0	48	1	2	29	1	1	1	4	1	1	0	0	1	0
1198	MMF top	0	0	0	0	0	0	0	0	8	0	0	1	2	0	1	1	0	2	1	0	100	2	5	2	0	0	1	8	0	1	1	6	0	0	60	3	3	25	0	1	4	1	1	1	0	1	0	1
1197	MMF top	2	0	0	0	0	0	0	0	3	1	0	2	1	0	0	10	0	0	1	0	97	1	5	3	1	0	1	6	0	0	0	5	0	2	3	2	2	79	1	1	1	1	0	0	0	0	0	0
1195	MMF top	0	0	0	0	0	0	2	0	7	1	0	1	0	0	0	3	0	1	1	0	87	5	6	2	1	1	3	5	0	4	0	4	0	0	43	4	3	41	0	0	6	2	0	2	0	0	2	0
1193	MMF top	0	0	0	0	0	0	1	1	7	0	0	5	0	0	2	5	0	0	1	1	106	1	4	1	0	0	0	10	1	2	0	8	0	0	24	1	1	40	0	0	6	5	2	0	0	0	2	0
1191	MMF top	2	0	0	0	0	0	0	1	9	2	0	0	1	0	0	5	0	0	2	1	118	1	5	5	2	0	0	8	0	1	0	4	1	0	22	0	0	62	1	0	4	3	0	0	0	1	1	0
1189	MMF top	2	0	0	0	0	0	2	0	4	2	0	0	1	0	0	11	0	1	2	0	73	2	11	2	2	3	0	2	0	0	0	6	0	0	26	0	1	87	0	0	6	1	0	0	0	0	1	0
1187	MMF top	1	0	0	0	0	0	2	0	5	2	1	0	2	0	0	7	0	2	0	3	89	2	11	2	0	3	0	2	1	0	0	1	0	2	28	1	0	60	1	0	2	2	1	1	0	1	0	0
1185	MMF top	0	0	0	0	0	0	1	0	8	2	0	1	0	0	0	12	0	2	2	0	88	5	5	0	0	1	0	14	1	0	0	5	0	1	30	1	0	53	1	1	3	1	0	0	0	1	0	0
1183	MMF top	2	0	0	0	0	1	1	0	8	0	0	0	1	0	1	16	0	1	2	2	93	1	2	0	1	2	0	22	0	1	0	4	0	0	23	1	1	45	2	2	6	1	1	2	0	0	0	0
1181	MMF top	1	0	0	0	0	0	0	1	9	1	0	1	0	0	0	14	0	3	0	0	96	2	4	1	0	0	1	17	4	0	0	5	0	1	21	0	3	53	0	0	2	2	1	0	0	0	0	0
1179	MMF top	2	0	0	0	0	0	0	0	16	3	0	0	0	0	0	9	0	1	2	1	95	7	8	2	0	0	0	12	0	1	0	3	0	1	37	0	1	49	1	0	6	0	0	2	0	0	0	1
1175	MMF top	0	0	0	0	0	0	0	0	8	0	0	4	1	0	0	2	1	0	4	2	112	0	12	2	0	0	1	18	1	0	0	2	0	1	15	0	3	41	1	0	6	0	1	0	1	0	0	2
1173	MMF top	0	0	0	0	0	0	2	0	6	5	0	2	1	0	0	9	0	0	2	0	111	0	5	1	1	0	1	11	1	0	0	5	0	0	40	0	2	32	0	2	4	3	4	0	0	0	0	0
1171	MMF top	0	0	0	0	0	0	1	2	7	0	0	0	1	0	0	7	0	0	1	0	104	3	6	1	0	1	0	13	1	0	1	3	0	0	44	0	6	27	2	0	3	5	1	0	0	0	0	1
1169	MMF top	0	0	0	0	0	0	1	0	0	0	0	1	1	0	0	13	0	0	3	0	145	0	7	5	0	1	1	4	2	1	0	2	0	0	45	0	0	14	0	0	6	2	1	2	0	0	0	0
1167	MMF top	0	0	0	0	0	0	2	0	6	1	0	0	1	0	1	7	0	1	1	0	114	2	9	2	0	0	0	7	1	0	0	9	0	0	51	0	2	17	0	0	4	2	0	1	0	0	0	0
1165	MMF top	1	0	1	0	0	0	1	0	6	0	0	1	0	0	0	17	0	3	2	2	101	0	5	3	0	2	0	2	0	1	0	7	0	0	34	1	1	34	1	0	8	4	0	0	0	1	0	0
1153	MMF center	0	0	0	0	0	0	1	0	3	0	0	2	0	0	0	11	0	0	2	0	96	0	10	1	0	1	1	13	0	0	0	4	0	0	33	0	0	39	0	0	10	5	1	0	0	0	0	0
1147	MMF center	0	0	0	0	0	0	1	0	2	1	0	4	0	0	0	5	0	1	5	2	97	2	13	0	0	0	1	12	0	0	0	5	2	2	47	2	1	9	0	0	7	3	4	1	0	0	0	0
1145	MMF center	0	0	0	0	0	0	1	0	0	1	0	1	0	0	0	23	0	2	2	1	107	2	10	3	0	1	0	18	1	1	0	8	0	0	41	0	2	27	0	0	6	3	0	1	1	0	0	0
1143	MMF center	0	0	1	0	0	0	0	0	1	1	0	3	0	0	0	18	0	0	4	1	91	1	12	3	0	0	2	6	0	1	0	4	0	1	24	0	0	62	1	0	10	5	1	0	0	0	0	0
1141	MMF center	0	0	0	0	0	0	0	0	3	1	0	1	0	0	0	25	0	3	3	0	92	1	9	1	0	1	0	5	0	0	0	5	0	1	3	0	0	69	1	0	6	11	0	0	1	0	0	0
1139	MMF center	1	1	0	0	0	0	1	1	2	6	0	6	0	0	0	28	0	1	6	1	75	0	12	0	0	1	1	6	0	0	0	6	0	1	29	0	0	61	0	0	3	8	2	1	1	0	0	0
1137	MMF center	1	0	0	0	0	0	0	0	1	0	0	3	0	0	0	37	0	2	8	2	87	5	4	1	0	0	0	1	1	0	0	2	0	0	38	0	0	39	0	0	5	5	1	0	0	0	0	0
1135	MMF center	2	0	0	0	0	0	1	1	0	0	0	1	0	0	0	20	0	1	10	4	100	1	2	0	1	1	1	4	0	0	0	1	0	1	35	0	0	31	1	0	3	5	1	2	0	0	1	0
1133	MMF center	1	0	0	0	0	0	1	0	4	1	0	1	0	0	0	16	0	0	2	0	101	1	8	0	0	1	1	13	0	0	0	7	0	2	48	0	1	29	1	1	6	4	0	0	0	1	0	0
1131	MMF center	0	0	0	0	0	0	1	0	0	0	0	0	1	0	0	9	0	3	6	3	83	1	4	2	0	1	0	5	0	0	0	3	0	0	76	0	0	28	1	0	6	4	2	0	0	0	0	0
1129	MMF center	0	0	0	0	0	1	1	0	2	2	0	1	0	0	0	14	0	1	1	0	87	3	7	6	0	0	1	5	3	0	0	5	0	0	32	0	0	52	1	0	5	5	1	1	0	1	0	0
1127	MMF center	1	0	0	0	0	0	2	0	1	0	0	1	0	0	0	4	0	3	3	1	84	3	12	0	0	0	0	22	1	1	0	7	0	0	63	0	1	24	0	1	1	1	2	0	0	0	0	0
1123	MMF center	0	0	0	0	0	0	2	0	1	1	0	0	0	0	0	1	0	2	6	5	86	1	11	1	0	0	0	16	1	1	0	2	0	0	58	1	1	30	0	1	7	1	0	0	0	0	0	0
1121	MMF center	0	0	0	0	0	0	3	1	1	3	0	0	0	0	0	4	0	0	5	0	88	0	14	2	0	0	0	11	2	1	0	6	0	0	39	1	0	45	0	0	4	3	0	0	0	0	0	0
1119	MMF center	1	0	0	0	0	1	2	0	2	1	0	2	0	0	1	11	0	2	5	0	76	0	8	2	0	0	0	20	0	0	0	8	0	0	43	1	0	46	2	0	6	4	0	1	0	0	0	0
1117	MMF center	0	0	0	0	0	1	4	0	0	0	0	2	0	0	0	11	0	3	4	0	94	0	12	1	0	0	1	12	0	2	0	10	0	0	40	0	1	13	0	1	8	3	1	0	0	0	0	0
1113	MMF center	0	0	0	0	0	1	1	0	0	1	0	1	0	0	1	22	0	3	4	2	67	2	6	0	0	0	0	11	1	0	0	9	0	0	58	0	2	30	1	0	4	6	2	0	0	0	1	0
1111	MMF center	0	0	0	0	0	0	2	0	2	4	0	1	0	0	0	4	0	3	15	3	54	1	12	1	0	1	0	16	1	1	0	14	0	0	46	0	1	38	1	2	12	5	1	1	0	0	1	0
1109	MMF center	0	0	0	0	0	0	2	0	0	1	0	0	0	0	0	26	0	2	7	1	53	0	14	3	0	0	2	28	0	0	0	4	1	1	45	1	2	28	1	1	7	4	0	2	0	0	1	0
1107	MMF center	0	0	0	0	0	0	3	0	0	3	0	0	1	0	0	8	0	5	21	3	55	8	10	0	0	1	0	14	0	0	0	7	0	0	32	0	0	45	3	1	5	6	0	1	0	0	0	1
1105	MMF center	1	0	0	0	0	0	0	0	0	6	0	0	2	0	0	24	0	1	2	0	65	6	6	2	0	1	2	13	1	0	0	10	0	0	46	1	3	24	0	0	4	9	2	2	0	0	0	0
1103	MMF center	0	0	0	0	0	0	2	1	0	1	0	0	0	0	0	9	1	6	9	1	82	4	8	0	0	0	1	22	0	1	0	8	0	0	41	3	3	33	1	1	6	2	0	0	0	0	0	0
1101	MMF center	0	0	0	0	0	0	1	0	0	0	0	2	0	0	0	28	0	1	7	2	80	3	6	2	0	0	0	27	1	0	0	16	0	1	61	0	0	5	0	0	3	2	0	2	0	0	0	0
1099	MMF center	0	0	0	0	0	2	1	1	0	0	0	1	0	0	0	9	0	6	19	3	64	7	7	0	0	1	0	3	2	1	0	6	0	0	17	0	1	66	2	0	5	4	1	0	0	0	0	0
1097	MMF center	2	0	0	0	0	1	1	0	1	0	0	1	2	0	0	15	0	1	8	0	67	4	5	1	0	1	0	23	1	0	0	3	0	1	41	1	1	38	0	2	1	5	0	3	0	0	1	0
1095	MMF center	0	0	0	0	0	1	2	0	2	4	0	0	0	0	0	9	0	1	3	3	83	0	6	0	0	0	0	15	0	0	0	5	0	0	56	2	0	20	1	0	6	7	0	0	0	0	0	1
1091	MMF center	1	0	0	0	0	0	4	0	0	1	0	1	0	0	0	16	0	2	7	2	64	2	14	0	0	3	0	1	2	3	0	9	1	0	60	1	1	23	1	1	7	6	0	1	0	1	0	0
1089	MMF center	1	0	0	0	0	0	1	1	0	6	0	0	1	0	0	22	0	3	5	0	67	1	4	0	0	1	0	1	0	0	0	14	0	0	28	2	1	44	1	7	7	6	3	1	0	0	0	0
1087	MMF center	1	0	0	0	0	0	2	0	0	2	0	0	0	0	0	12	0	2	11	9	99	2	6	0	0	1	0	6	1	3	0	15	0	0	55	0	2	5	3	1	6	9	0	2	0	0	1	0
1085	MMF center	1	0	0	0	0	0	4	0	1	1	0	1	0	0	0	22	0	1	4	0	76	2	3	0	0	0	0	3	1	0	2	12	0	0	31	0	0	54	1	2	2	8	1	0	0	0	0	0
1083	MMF center	4	0	0	0	0	0	3	0	0	1	0	2	0	0	0	6	0	4	5	3	73	4	4	0	0	1	0	2	3	2	0	11	0	0	79	2	1	12	0	2	7	7	0	2	0	0	0	0
1081	MMF center	4	0	0	0	0	0	9	0	2	2	0	2	0	0	0	11	0	4	6	0	54	4	4	0	0	1	0	7	2	2	0	9	0	0	42	0	0	50	2	2	8	8	0	0	0	1	0	0
1079	MMF center	0	0	0	0	0	0	0	0	2	1	0	2	2	0	0	8	0	4	11	5	42	2	6	0	0	0	0	26	5	2	0	8	0	1	65	0	2	13	2	3	8	1	0	2	0	0	0	0
1077	MMF center	0	0	0	1	0	0	5	2	0	1	0	2	0	0	0	6	0	1	5	1	54	0	7	0	0	1	0	27	1	1	0	4	0	1	52	1	0	41	1	3	3	5	0	3	0	0	1	0
1075	MMF center	3	0	0	0	0	2	2	3	1	2	0	1	0	0	0	4	1	1	12	2	41	1	5	0	1	0	0	3	1	0	0	7	0	0	55	2	3	43	2	1	6	6	0	4	0	0	2	0
1073	MMF center	0	0	0	0	0	0	5	1	0	1	0	2	1	0	0	18	0	1	9	0	32	1	2	0	1	1	0	2	2	2	0	6	2	0	24	1	1	97	0	2	4	2	0	1	0	1	1	0
1071	MMF center	1	0	0	0	0	0	6	1	1	2	0	6	0	0	0	5	0	2	7	0	63	1	4	0	1	2	0	0	1	0	0	4	0	0	73	0	2	21	1	1	1	4	0	3	0	0	0	0
1069	MMF center	0	0	0	0	0	0	1	0	0	2	0	1	1	0	0	9	0	2	10	2	52	0	5	1	0	2	0	1	3	0	0	11	0	3	25	2	0	59	1	1	5	6	0	0	6	0	0	0
1067	MMF center	1	0	0	0	0	2	3	1	0	1	0	1	1	0	0	5	0	1	7	0	85	0	3	0	0	0	1	1	2	1	0	6	0	0	70	1	1	12	2	3	4	10	1	2	0	0	0	0
1065	MMF center	1	0	0	0	0	0	2	0	0	4	0	3	0	0	0	19	0	2	3	1	79	0	6	0	0	1	1	2	2	3	0	7	0	4	59	8	2	12	1	0	6	5	0	1	0	1	0	0
1063	MMF center	1	0	0	0	0	1	2	0	0	5	1	1	0	0	0	3	0	2	15	6	88	3	2	0	0	1	1	2	2	1	0	6	0	1	65	0	3	4	1	1	9	5	0	0	0	0	0	0
1061	MMF center	2	0	0	0	0	0	2	0	0	2	0	1	1	0	0	25	0	2	4	1	89	1	2	0	0	2	0	7	0	3	0	10	0	1	36	2	1	29	2	1	4	6	0	1	1	0	0	0
1059	MMF center	1	0	1	0	0	0	5	1	1	2	0	0	0	0	0	4	0	1	5	2	121	0	2	0	0	2	0	9	6	0	0	6	1	2	53	2	1	1	0	1	5	7	3	0	0	0	0	1
1055	MMF center	2	0	0	0	0	0	1	0	0	2	0	4	0	0	0	12	0	1	3	4	104	0	0	0	0	2	0	7	4	0	0	7	0	2	46	2	1	6	1	4	7	7	1	3	0	0	0	0
1053	MMF center	2	0	0	0	0	0	2	0	0	4	0	0	0	0	0	4	0	1	3	1	101	1	1	0	0	1	0	10	4	2	0	3	1	1	44	1	1	31	4	2	7	1	0	0	0	0	0	0
1051	MMF center	1	0	0	0	0	0	2	0	0	1	0	2	0	0	0	4	0	2	7	2	97	1	8	0	0	2	0	9	2	1	0	9	0	0	63	0	0	4	1	2	4	3	0	2	0	0	0	0
1049	MMF center	0	0	0	0	0	1	1	0	0	9	0	0	1	0	0	8	0	0	2	0	110	2	1	0	0	1	0	5	3	0	0	0	0	1	61	0	0	19	2	0	11	3	0	2	0	0	0	0
1047	MMF center	2	0	0	0	0	0	2	0	0	3	0	0	0	0	0	3	0	2	8	2	108	4	2	0	0	7	0	7	2	1	0	4	0	1	56	4	0	7	1	1	10	1	0	6	0	1	0	0
1045	MMF center	0	0	0	0	0	0	0	0	0	4	0	0	1	0	1	5	0	5	5	0	95	2	2	0	0	1	0	7	2	0	0	7	0	0	54	1	2	17	1	0	12	1	1	2	0	0	0	0
1043	MMF center	1	0	0	0	0	0	1	0	0	3	0	3	0	0	0	3	0	4	3	2	87	3	0	0	1	0	0	12	4	1	0	6	0	0	30	2	1	48	1	3	5	2	0	1	1	0	0	0
1041	MMF center	0	0	0	0	0	0	2	0	0	3	0	1	0	0	0	6	0	2	2	0	101	2	1	1	0	1	0	17	1	1	0	13	1	1	63	1	0	15	3	4	12	4	1	1	1	0	0	0
1039	MMF center	4	0	0	1	0	0	6	0	0	4	0	4	1	0	2	3	0	0	1	0	79	3	0	0	0	0	0	3	6	0	1	5	0	2	41	1	3	47	6	2	3	6	0	2	0	1	0	0
1037	MMF center	2	0	0	0	0	0	1	0	1	8	0	2	1	0	0	7	0	1	0	0	110	1	1	0	0	0	0	0	2	0	0	4	0	0	48	1	0	32	0	4	7	1	0	1	0	0	0	0
1035	MMF center	0	0	0	0	0	0	7	0	0	2	0	4	0	0	0	1	0	2	4	0	31	6	3	0	0	1	0	2	2	1	0	5	0	3	111	3	2	15	2	2	10	10	2	1	0	1	0	0
1033	MMF center	1	0	0	0	0	3	4	0	0	5	0	6	2	0	0	5	0	2	2	1	93	4	0	0	0	2	1	0	7	3	0	6	0	3	46	3	5	32	2	3	10	5	1	0	0	0	0	0
1031	MMF center	2	0	0	0	0	2	10	0	1	2	1	3	2	0	1	2	0	1	2	2	29	2	0	0	0	1	0	1	4	3	0	10	0	4	49	2	8	39	4	4	9	13	0	2	0	0	0	0
1029	MMF center	1	0	0	0	0	0	10	1	0	3	0	2	5	0	0	6	0	2	4	1	37	2	2	0	0	2	2	0	4	6	0	8	0	3	74	0	2	20	2	3	8	10	1	3	0	2	0	0
1027	MMF center	2	0	0	0	0	3	3	0	0	1	0	2	1	0	0	0	0	1	0	1	44	3	4	0	0	4	0	0	3	4	0	8	1	2	95	7	6	1	1	5	14	6	0	2	0	0	0	0
1025	MMF center	4	0	0	1	0	0	6	1	0	4	0	0	2	0	0	0	0	1	2	0	52	2	1	0	0	2	1	0	6	6	0	6	0	3	79	1	7	28	2	1	5	3	0	2	1	0	0	0
1023	MMF center	5	0	0	0	0	1	12	0	0	1	0	4	2	0	2	2	0	0	2	3	96	4	0	0	0	1	1	1	4	0	0	2	0	2	69	0	2	15	2	1	7	0	0	3	0	0	0	0
1021	MMF center	3	0	0	0	0	1	2	1	0	3	0	1	1	0	1	3	0	3	1	0	79	3	2	1	0	3	0	0	2	1	0	1	2	1	55	0	2	28	4	7	11	1	0	0	0	0	0	0
1019	MMF center	2	0	0	0	0	0	7	0	0	3	0	2	3	0	3	1	0	0	2	4	61	4	5	0	0	2	1	2	3	0	0	1	0	1	91	3	1	6	1	2	12	0	1	1	0	2	0	0
1017	MMF center	11	0	0	0	0	0	4	0	0	2	0	0	0	0	0	8	0	0	1	0	99	0	0	0	0	4	1	0	1	0	0	4	0	3	23	3	0	16	1	3	36	0	0	1	0	3	0	0
1015	MMF center	0	0	1	0	0	0	2	0	0	3	0	0	1	0	0	5	0	3	1	2	77	4	0	1	0	7	0	1	2	1	1	1	1	4	63	3	0	5	2	3	54	0	0	0	0	1	0	0
1013	MMF center	9	0	0	0	0	1	2	0	0	5	1	1	0	0	0	6	0	3	0	0	85	2	0	0	0	12	1	5	0	1	1	4	0	3	33	2	0	21	1	2	22	3	0	3	0	4	0	0
1011	MMF center	0	0	0	0	0	1	1	0	0	2	0	2	2	0	0	8	0	6	3	3	82	0	1	0	0	13	0	1	3	1	1	5	2	3	43	2	1	8	0	3	18	1	1	4	0	1	0	0
1009	MMF center	6	0	0	0	0	2	4	0	0	2	1	2	0	0	0	14	0	5	0	0	58	2	1	0	0	30	0	9	3	0	0	4	1	3	28	3	0	14	1	5	27	0	0	5	0	2	0	0
1007	MMF center	1	0	0	0	0	0	1	0	0	0	0	3	0	0	0	4	0	2	3	5	110	1	0	0	0	8	0	9	2	1	0	4	0	5	57	2	0	3	0	2	11	0	1	2	0	0	0	0
1005	MMF center	2	0	0	0	0	1	1	0	1	3	0	0	0	0	0	6	0	4	2	1	80	1	1	0	0	3	0	39	4	1	0	3	0	4	32	0	0	22	1	4	18	2	0	2	0	0	0	0
1003	MMF center	4	0	1	0	0	1	1	0	0	0	0	1	1	0	1	3	1	3	4	0	84	1	3	0	0	3	0	33	0	0	0	2	0	2	68	7	2	6	1	2	6	0	0	0	0	0	0	0
999	MMF center	5	0	0	0	0	0	1	0	0	0	0	0	0	0	0	1	0	0	2	1	119	2	2	0	0	2	0	23	1	0	0	2	0	0	49	0	1	11	1	2	3	3	1	2	0	0	1	0
997	MMF center	0	0	0	0	0	0	2	0	3	3	0	5	0	0	0	2	0	0	0	0	98	0	4	0	0	0	0	5	4	1	0	4	0	0	32	3	0	55	1	0	6	2	1	2	0	0	0	0
995	MMF center	0	0	0	0	0	1	4	0	2	5	0	5	0	0	0	1	0	1	0	0	79	4	11	3	0	2	0	3	1	1	0	4	0	0	74	1	3	12	0	2	7	0	3	3	0	2	2	0
993	MMF center	0	0	0	0	0	0	3	0	0	1	0	3	0	0	0	3	0	0	0	0	119	2	3	1	0	0	1	9	0	1	0	4	0	0	54	1	2	25	3	1	4	4	0	0	0	0	3	0
991	MMF center	2	0	0	0	0	0	1	0	0	2	0	2	0	0	0	2	0	0	0	1	95	0	4	4	0	2	0	1	0	0	1	7	0	2	62	3	1	17	2	3	5	3	1	3	0	0	8	0
989	MMF center	5	0	1	0	0	1	7	0	0	0	0	3	0	0	0	1	0	3	0	0	99	0	0	1	0	1	1	5	0	0	0	7	1	2	52	1	1	12	2	3	5	3	4	3	0	0	2	0
985	MMF center	4	0	0	0	0	0	1	1	0	0	0	2	0	0	1	1	0	0	1	0	108	4	2	1	0	0	1	4	1	1	0	3	0	0	30	0	1	36	2	1	4	1	2	1	0	0	3	0
983	MMF center	0	0	0	0	0	2	3	0	1	1	0	1	1	0	0	2	0	0	0	0	94	1	5	1	0	2	1	1	1	1	0	7	0	0	67	1	0	20	0	2	8	4	3	4	0	0	2	0
979	MMF center	1	0	0	0	0	2	6	0	1	2	0	3	0	0	1	0	0	0	1	0	74	2	6	1	0	0	3	5	5	0	0	9	0	0	87	3	1	3	1	2	4	5	4	2	1	1	1	0
975	MMF center	5	0	0	0	0	0	1	0	2	1	0	2	1	0	0	2	0	2	1	3	96	1	7	0	0	1	0	5	0	0	0	5	0	1	55	3	1	3	2	3	9	9	1	3	0	1	0	1
973	MMF center	0	0	0	0	0	1	1	0	1	2	0	2	0	0	0	8	0	1	1	0	118	1	10	5	1	3	0	2	1	0	0	19	1	0	39	2	0	4	1	1	4	4	0	0	0	0	1	0
969	MMF center	0	0	0	0	0	0	0	0	0	2	0	0	0	0	0	3	0	1	0	1	128	2	3	0	0	0	0	38	5	0	0	4	0	0	27	1	0	1	0	0	11	1	0	2	0	1	0	0
965	MMF center	0	0	0	0	0	0	4	2	0	5	0	1	0	0	0	11	0	1	2	0	105	1	6	0	0	0	0	12	3	0	0	4	1	1	52	3	1	4	1	2	7	2	0	1	0	0	0	0
963	MMF center	5	0	0	0	0	0	0	0	0	1	0	0	0	0	0	3	0	3	4	5	119	3	4	0	0	1	1	8	3	0	0	7	0	2	38	1	1	37	1	2	6	0	0	1	0	0	0	0
959	MMF center	1	0	0	0	0	2	0	0	0	3	0	0	0	0	0	8	0	0	2	4	106	3	2	1	0	0	0	8	2	0	0	3	0	0	51	4	0	16	0	2	6	1	0	2	0	0	0	0
957	MMF center	0	0	0	0	0	0	2	0	0	2	0	0	0	0	0	5	0	2	2	1	98	2	6	0	0	0	0	16	1	0	0	10	0	1	24	0	0	54	1	1	2	5	0	0	0	0	0	0
955	MMF center	1	0	0	0	0	1	1	0	0	5	0	2	0	0	0	1	0	0	2	2	98	1	6	2	0	0	2	4	4	0	0	8	0	0	62	4	1	23	3	1	8	3	0	0	0	1	0	0
953	MMF center	1	0	0	1	0	0	7	0	1	0	0	4	0	0	0	5	1	3	2	1	89	1	7	0	0	0	0	8	2	1	0	13	1	0	16	1	0	56	1	1	2	3	2	1	0	0	0	0
949	MMF center	1	0	0	0	0	0	2	1	1	1	0	3	0	0	0	4	2	1	1	0	99	1	13	0	0	0	1	3	0	1	0	6	0	1	8	1	0	59	0	0	3	3	1	0	1	0	0	0
947	MMF center	0	0	0	0	0	0	3	0	0	2	0	6	0	0	0	1	1	1	1	1	114	0	13	1	0	1	0	4	0	0	0	10	1	0	29	0	2	31	1	3	3	2	1	1	0	0	0	0
945	MMF center	1	0	0	0	0	0	4	1	0	0	0	0	0	0	0	5	0	2	3	0	104	1	7	0	1	1	0	1	0	0	0	7	0	1	46	1	0	40	2	2	3	3	2	1	0	0	2	1
943	MMF center	0	0	0	0	0	1	0	0	0	1	0	3	1	0	0	3	0	0	0	1	122	3	9	0	0	0	1	4	1	2	0	6	0	1	37	0	0	19	0	0	10	3	1	2	0	0	0	0
941	MMF center	0	0	0	0	0	2	4	1	4	2	0	5	0	0	0	1	0	2	2	0	103	0	11	0	0	2	0	4	1	1	0	7	0	1	19	1	0	39	1	4	6	2	1	3	0	0	1	0
939	MMF center	0	0	0	0	0	0	1	0	0	0	0	9	0	0	0	3	0	2	2	1	96	3	5	3	0	0	1	2	0	0	0	8	0	1	56	0	3	28	0	1	3	6	1	3	1	0	1	0
937	MMF center	0	0	1	0	0	1	1	0	0	1	0	2	0	0	1	3	0	0	3	0	106	1	6	2	2	2	0	1	3	1	0	10	0	0	37	0	0	33	0	1	3	5	0	2	0	0	2	0
935	MMF center	1	0	0	0	0	1	4	3	0	0	0	7	1	0	1	2	0	1	0	1	127	1	6	2	0	1	0	0	0	1	0	6	2	0	30	2	1	15	2	2	1	1	1	1	0	0	1	0
933	MMF center	0	0	0	0	0	0	4	0	1	3	0	6	2	0	0	4	1	0	1	0	111	2	11	3	0	0	2	4	3	1	0	11	0	0	39	0	1	6	1	0	3	6	0	2	0	0	0	0
929	MMF center	2	0	0	0	0	0	3	0	0	1	0	2	0	0	0	7	0	0	2	2	101	0	5	1	0	0	0	14	0	1	0	7	0	0	23	2	2	28	2	2	4	5	2	0	0	0	1	0
927	MMF center	0	0	0	0	0	1	0	0	0	3	0	2	0	0	0	3	0	2	4	0	106	2	18	1	0	0	1	3	0	1	0	7	0	1	37	2	1	22	1	0	4	5	0	0	0	0	0	0
923	MMF center	0	0	0	0	0	3	3	0	0	3	0	3	0	0	1	5	0	4	4	2	90	3	6	0	0	2	0	8	1	0	0	6	3	1	35	0	0	26	0	0	3	6	2	0	0	1	1	0
919	MMF center	0	0	0	0	0	0	0	0	0	0	0	5	0	0	1	4	0	1	6	3	115	1	7	1	0	3	0	11	1	1	0	4	0	1	48	2	0	1	0	0	5	5	2	0	0	0	0	0
917	MMF center	0	0	0	0	0	1	1	0	2	3	0	0	0	0	0	5	0	3	3	1	104	2	13	1	0	1	1	15	1	0	0	9	1	0	50	0	0	8	1	0	4	6	1	0	0	0	0	0
915	MMF center	6	0	0	0	0	0	5	0	0	1	0	2	0	0	0	8	0	5	1	2	113	2	13	0	0	2	0	8	1	0	0	4	0	0	22	0	0	18	1	1	2	6	1	0	0	0	0	0
913	MMF center	0	0	0	0	0	0	0	0	0	4	0	8	0	0	1	15	0	1	5	1	95	0	14	5	0	3	0	12	0	0	0	13	1	1	33	2	0	19	1	0	4	8	1	3	0	0	0	0
909	MMF center	2	0	0	0	0	0	1	0	3	4	0	1	0	0	1	14	0	1	0	1	97	0	13	2	0	0	0	10	1	0	0	4	0	1	40	0	0	27	0	0	9	11	1	0	0	0	0	0
907	MMF center	1	0	0	0	0	2	1	0	0	4	0	3	1	0	0	8	0	8	9	4	103	0	10	0	0	0	0	5	0	0	0	7	0	0	17	3	0	40	0	0	7	5	1	1	0	0	0	0
905	MMF center	1	0	0	0	0	2	3	0	0	2	0	1	0	0	0	22	0	0	4	2	104	1	5	2	0	0	1	5	5	0	0	7	0	1	39	2	2	6	0	0	7	8	0	1	0	0	0	0
903	MMF center	1	0	0	0	0	0	0	0	0	2	0	3	1	0	0	2	0	6	6	2	100	3	7	0	0	1	0	5	1	0	0	4	0	0	15	1	1	54	1	0	9	6	0	0	0	2	1	0
899	MMF center	1	0	0	0	0	1	1	0	0	1	0	1	0	0	0	1	0	5	7	2	108	3	6	1	0	1	0	2	1	0	0	5	0	0	33	1	1	31	2	1	4	2	0	0	0	0	1	0
893	MMF center	1	0	0	0	0	1	1	0	0	3	0	1	0	0	0	6	0	5	1	2	98	1	9	0	0	1	2	9	0	0	1	12	0	1	49	0	1	17	1	0	6	2	0	1	0	1	1	0
891	MMF center	1	0	0	0	0	1	0	0	1	2	0	2	0	0	0	2	0	4	6	0	69	3	7	0	1	1	0	14	0	1	0	9	0	1	60	5	1	27	2	2	4	5	0	1	0	1	1	0
889	MMF center	1	0	0	0	0	0	2	1	0	1	0	4	0	0	0	9	0	0	3	1	92	3	12	4	0	3	0	3	3	0	0	13	1	0	60	1	1	9	1	1	4	9	0	2	0	1	0	0
885	MMF center	0	0	0	0	0	0	6	0	1	2	0	3	0	0	0	3	0	1	2	0	96	3	12	3	0	0	1	5	1	0	0	8	0	0	45	0	0	24	2	0	4	4	1	2	1	0	0	0
883	MMF center	0	0	0	0	0	0	4	0	0	0	0	3	0	0	0	5	0	8	3	2	78	3	9	0	0	0	1	17	0	1	2	10	0	0	51	1	2	13	0	1	3	3	1	0	0	0	1	1
875	MMF center	0	0	0	0	0	1	2	0	0	0	0	2	1	0	0	2	0	2	5	1	94	3	5	2	0	2	0	9	2	1	2	10	1	0	19	2	4	50	1	0	3	1	1	3	0	0	1	0
869	MMF center	0	0	0	0	0	1	2	1	1	1	0	8	1	0	0	10	0	0	4	2	64	0	6	1	0	1	0	10	0	0	1	15	0	0	13	0	0	82	0	2	3	8	0	1	0	0	2	0
867	MMF center	0	0	0	0	0	0	6	0	0	1	0	7	1	0	0	1	0	5	9	2	71	2	12	0	0	1	0	12	0	1	0	8	0	0	9	0	1	54	2	4	10	3	0	5	0	0	0	0
865	MMF center	0	0	0	0	0	2	4	1	0	1	0	3	0	0	0	18	0	4	5	1	82	0	14	1	2	0	0	14	2	0	1	12	0	1	42	2	2	13	1	2	6	6	0	0	1	0	0	0
863	MMF center	1	0	0	0	0	1	3	0	1	3	0	3	0	0	0	6	0	1	12	4	90	0	9	1	0	2	0	9	2	0	0	3	2	0	20	0	1	30	0	1	6	4	0	2	0	0	6	0
861	MMF center	0	0	0	0	0	0	3	2	1	3	0	0	0	0	0	13	0	3	5	1	60	2	17	1	0	0	1	32	1	0	3	8	1	1	41	0	1	20	2	1	2	1	0	1	0	0	1	0
857	MMF center	0	0	0	0	0	1	1	0	0	2	0	2	0	0	0	15	0	5	5	2	98	0	6	0	0	1	0	12	0	0	1	6	0	0	8	1	0	55	1	2	7	3	1	0	0	0	0	0
855	MMF center	5	0	0	0	0	2	4	0	0	3	0	1	0	0	0	1	0	1	2	2	82	2	4	2	0	1	0	3	0	2	2	5	0	2	42	1	2	29	1	0	7	2	0	4	0	1	3	0
849	MMF center	0	0	0	0	0	0	3	0	0	0	0	2	0	0	0	6	0	3	5	1	71	5	6	0	0	0	0	3	0	0	0	6	1	2	42	2	1	38	1	1	24	7	2	6	0	0	0	0
847	MMF center	1	0	0	0	0	1	1	0	1	2	0	2	0	0	0	0	0	0	2	2	108	1	2	2	1	1	0	2	0	0	0	6	0	0	75	2	0	8	0	0	8	7	0	1	0	0	2	0
843	MMF center	3	0	0	0	0	1	4	0	0	0	0	0	0	0	0	0	0	7	2	1	86	0	2	1	0	3	1	6	1	0	0	1	0	2	15	0	0	52	0	2	10	5	2	3	1	0	1	0
842	MMF center	6	0	0	0	0	0	3	0	0	1	0	1	0	0	0	7	1	5	3	0	75	0	6	0	0	1	1	2	1	1	0	6	0	0	33	0	0	31	5	0	6	15	2	6	0	0	2	0
838	MMF center	2	0	0	1	0	0	1	0	0	3	0	4	0	0	0	7	0	2	2	0	79	2	3	1	1	1	2	5	3	0	0	8	0	0	37	0	1	40	0	1	11	22	0	3	0	1	5	0
836	MMF center	6	1	0	0	0	0	1	1	0	1	0	2	0	0	0	3	0	3	7	3	87	1	3	1	0	2	0	3	0	0	0	6	0	1	47	0	2	20	1	2	7	7	0	1	1	0	2	2
834	MMF center	0	0	0	0	0	0	2	0	0	4	1	0	0	0	0	6	0	2	4	3	81	1	2	0	0	0	0	4	0	0	0	6	1	3	35	0	0	56	1	0	7	7	1	1	1	2	0	0
832	MMF center	0	0	0	0	0	0	0	0	0	1	0	0	1	0	0	1	0	6	3	3	101	4	2	2	0	0	0	6	1	0	0	8	0	2	59	3	1	13	0	0	15	6	0	0	0	0	0	1
830	MMF center	2	0	0	0	0	0	0	0	0	1	0	1	0	0	0	4	0	4	1	2	87	1	11	4	0	0	0	5	1	1	0	10	0	0	41	1	0	42	0	0	7	5	1	4	0	0	0	0
828	MMF base	1	0	0	0	0	0	3	0	0	0	0	2	0	0	0	2	0	4	1	3	99	1	2	2	0	6	1	11	1	0	0	5	1	2	37	3	0	14	0	0	11	6	0	3	0	0	1	1
826	MMF base	0	0	0	0	0	0	0	1	1	1	0	1	0	0	0	5	1	5	0	3	78	3	5	2	1	5	0	9	4	0	0	4	0	3	61	0	0	17	2	0	16	6	1	1	0	2	0	0
822	MMF base	2	0	0	0	0	0	0	0	0	3	0	0	0	0	0	4	0	3	0	2	108	2	4	1	0	1	0	4	1	0	0	5	0	2	50	1	0	34	2	0	13	1	1	0	0	1	0	0
820	MMF base	1	0	0	0	0	0	1	0	0	1	0	1	0	0	0	1	0	0	5	0	118	0	3	1	0	3	0	7	1	0	0	8	0	0	34	0	1	16	0	2	10	7	0	1	0	0	0	0
818	MMF base	9	0	0	0	0	0	1	0	0	1	0	2	0	0	0	6	0	0	0	0	91	3	2	2	0	0	0	1	1	0	0	7	0	0	32	0	0	42	1	2	5	9	1	1	0	1	0	0
816	MMF base	5	0	0	0	0	0	2	0	3	2	0	0	0	0	1	0	0	2	0	0	103	0	2	0	0	1	0	2	2	0	0	2	0	1	9	1	1	61	3	0	5	0	1	3	1	0	0	0
814	MMF base	3	0	0	0	0	0	4	1	0	1	0	3	0	0	0	1	0	3	0	1	129	1	1	2	0	1	0	0	0	0	0	5	0	0	44	1	0	33	0	1	6	3	0	1	0	0	0	0
812	MMF base	7	0	0	0	0	0	1	0	0	2	0	0	0	0	0	0	0	1	3	0	106	1	3	0	0	1	0	5	2	0	0	4	0	1	31	1	1	44	0	2	8	4	0	6	0	0	0	1
808	MMF base	3	0	0	0	0	1	1	0	1	4	1	1	0	0	0	2	0	6	1	2	111	3	2	0	0	0	0	3	2	2	0	2	0	0	42	4	0	32	0	1	5	3	0	1	0	0	0	0
806	MMF base	1	0	0	0	0	0	1	0	0	2	0	1	1	0	2	2	0	0	0	1	93	3	5	0	0	2	0	1	3	0	0	5	0	0	24	0	2	57	2	2	1	9	1	5	1	0	0	0
804	MMF base	2	0	0	0	0	0	4	0	0	1	0	0	1	0	1	1	0	0	2	1	77	2	3	0	0	2	1	0	2	0	0	9	0	0	53	3	0	43	4	0	4	4	1	1	1	0	1	0
802	MMF base	4	0	0	0	0	1	1	0	0	1	0	2	0	0	0	3	0	1	0	1	90	0	2	0	0	2	1	0	0	0	0	8	1	1	37	0	1	63	1	2	1	3	0	1	0	0	0	0
800	MMF base	4	0	0	0	0	0	3	0	0	1	0	1	1	0	0	0	1	2	0	1	109	3	3	1	0	0	1	1	1	0	0	10	1	2	54	2	0	24	2	1	3	5	0	5	0	0	0	0
798	MMF base	2	0	0	0	0	0	1	0	1	5	0	1	1	0	0	2	0	2	0	1	100	1	1	0	1	1	0	0	1	0	0	6	0	3	47	3	1	39	4	0	0	4	1	3	0	1	0	0
796	MMF base	1	0	0	0	0	0	3	1	0	0	0	2	0	0	0	2	0	1	1	0	109	1	2	0	0	3	0	0	2	1	0	6	0	2	48	1	1	14	2	0	4	4	1	1	1	0	0	0
794	MMF base	3	1	0	0	0	0	6	1	0	5	0	0	2	0	0	6	0	0	1	0	113	2	1	1	0	2	0	0	0	0	0	2	0	1	13	0	1	62	2	1	7	6	0	0	0	0	0	0
792	MMF base	17	0	0	0	0	1	4	1	0	2	0	1	2	0	0	0	0	2	0	0	79	0	2	0	1	0	3	3	0	1	0	1	1	2	6	1	2	62	2	0	5	3	0	0	0	0	0	0
790	MMF base	2	0	0	0	0	1	1	1	1	3	0	1	1	0	0	1	0	0	0	2	117	1	0	0	0	3	1	1	3	1	0	2	0	1	24	2	0	57	1	0	4	6	0	3	0	0	0	0
788	MMF base	6	0	0	0	0	0	5	0	0	1	0	1	0	0	0	1	1	1	0	0	106	1	1	0	1	1	0	0	2	0	0	2	0	5	45	1	3	29	4	1	2	4	0	0	0	0	0	1
786	MMF base	2	0	0	0	0	0	3	0	0	0	0	1	0	0	1	2	0	0	0	1	115	1	3	0	0	2	2	0	2	0	0	3	0	3	38	1	1	30	1	0	6	6	0	4	0	1	0	0
784	MMF base	6	0	0	0	0	0	2	0	0	4	0	0	0	0	0	0	0	0	0	2	112	1	2	0	0	0	1	2	0	0	0	1	1	1	21	2	0	51	1	2	4	4	2	2	0	0	0	0
782	MMF base	3	0	0	0	0	0	0	0	0	2	0	1	0	0	1	2	0	1	0	1	113	2	2	0	0	2	0	1	1	0	0	3	0	0	36	0	0	42	2	2	5	7	0	1	0	1	0	1
780	MMF base	2	0	0	0	0	0	2	0	0	1	0	0	1	0	0	5	0	2	2	1	124	3	2	0	0	1	0	0	1	1	0	4	0	2	53	3	3	7	1	1	3	3	0	5	0	0	0	0
778	MMF base	5	0	0	0	0	0	2	0	0	4	0	3	1	0	3	3	0	2	1	0	103	2	1	0	0	2	0	1	4	0	0	7	1	0	46	3	1	14	0	0	8	8	0	3	0	0	0	0
776	MMF base	1	0	0	0	0	0	3	1	0	0	0	1	0	0	0	2	0	3	3	1	98	1	1	0	0	2	3	21	3	1	0	3	0	0	27	4	0	17	1	1	9	4	0	1	0	3	0	0
774	MMF base	4	0	0	0	0	0	1	0	0	7	0	0	0	0	0	4	0	1	2	0	88	0	2	0	0	2	2	3	2	0	0	5	0	6	24	2	0	43	3	2	11	1	1	6	0	0	0	0
772	MMF base	8	0	0	0	0	0	2	0	0	1	0	0	2	0	0	0	0	9	0	0	109	1	0	0	0	8	0	7	6	0	0	1	1	1	17	3	0	22	1	2	14	2	0	0	0	2	0	0
770	MMF base	2	0	0	0	0	0	0	1	0	2	0	1	0	0	1	1	0	2	2	1	102	3	1	0	0	1	0	1	0	0	0	6	2	0	41	1	0	31	2	2	19	4	1	4	0	1	0	0
768	MMF base	1	0	0	0	0	0	0	0	0	0	0	0	0	0	1	5	0	5	2	0	83	1	1	0	0	6	0	8	2	0	0	5	0	1	36	2	1	24	0	3	17	7	0	3	0	4	0	0
766	MMF base	2	0	0	0	0	0	1	0	0	7	0	0	0	0	0	2	0	1	1	1	88	0	1	0	0	8	0	4	0	0	1	0	1	1	14	1	0	65	3	5	16	3	0	3	0	0	0	0
764	MMF base	3	0	0	0	0	0	0	0	0	1	0	4	1	0	0	2	0	3	1	2	92	2	1	0	0	7	1	11	1	1	0	1	0	2	41	5	0	6	1	1	16	11	0	11	0	1	0	0
762	MMF base	2	0	0	0	0	0	1	1	0	1	0	0	0	0	1	4	0	1	2	1	99	1	1	0	0	9	1	13	1	0	0	5	1	3	37	1	1	22	0	1	13	1	0	7	0	2	0	0
760	MMF base	1	0	0	0	0	0	1	0	0	1	1	0	3	0	0	5	0	0	1	6	92	4	0	0	0	7	1	11	1	1	0	2	2	0	46	0	0	11	1	1	16	0	0	7	0	5	0	0
758	MMF base	1	0	0	0	0	0	0	0	0	1	0	0	0	0	0	3	0	4	4	2	105	1	3	1	0	9	0	10	4	0	0	0	0	0	47	0	3	10	2	2	14	1	0	7	0	4	0	0
756	MMF base	3	0	0	0	0	0	0	0	0	3	0	2	0	0	0	3	0	5	0	3	71	5	2	1	0	7	0	8	1	2	0	2	0	2	53	2	0	23	1	1	25	3	0	3	0	4	0	0
754	MMF base	5	0	0	0	0	1	2	1	0	7	0	0	0	0	1	9	0	3	5	2	82	0	1	0	0	5	0	17	3	0	0	2	2	2	42	0	0	14	1	3	17	0	1	8	1	0	0	0
752	MMF base	1	0	0	0	0	0	1	0	0	1	0	0	0	0	1	9	0	3	6	0	93	4	0	1	0	9	0	17	5	1	0	2	0	1	11	2	0	33	0	0	14	1	0	3	0	0	0	0
750	MMF base	3	0	0	0	0	0	0	0	1	4	1	1	0	0	0	11	0	5	1	1	101	1	3	2	0	3	1	4	1	0	0	2	0	5	41	4	1	34	1	0	6	0	0	3	0	1	0	1
748	MMF base	9	0	0	0	0	0	1	0	0	4	1	1	0	0	0	7	0	1	1	0	69	4	8	1	0	4	0	34	4	0	0	2	0	4	17	1	0	31	1	0	7	2	0	0	1	0	0	0
746	MMF base	7	0	0	0	0	0	2	0	2	3	0	2	0	0	1	4	0	2	1	0	79	1	5	0	0	3	0	15	1	0	0	0	0	2	40	2	1	44	3	1	10	2	0	3	0	0	0	0
744	MMF base	3	0	0	0	0	0	2	0	1	5	0	1	0	0	1	2	0	2	1	1	73	2	7	0	0	3	0	12	2	2	0	4	0	4	9	3	0	62	0	0	4	3	1	3	1	0	0	0
742	MMF base	2	0	0	0	0	1	1	1	9	3	0	5	2	0	0	7	0	2	0	1	52	5	12	1	0	5	0	4	3	0	0	3	0	0	26	3	2	49	4	1	15	2	0	4	0	0	0	0
740	MMF base	0	0	0	0	0	0	4	0	3	2	0	6	0	0	0	1	0	0	2	0	65	0	9	2	0	3	0	5	0	0	1	2	0	0	23	2	0	61	0	2	10	2	1	5	0	0	4	0
738	MMF base	1	0	0	0	0	0	1	0	3	1	0	7	0	0	5	4	0	3	1	0	65	0	6	1	0	2	0	4	1	1	0	3	0	3	14	1	0	77	3	0	14	2	2	5	0	0	1	0
736	MMF base	0	0	0	0	0	1	2	0	0	1	0	11	1	0	0	7	0	1	1	2	63	7	5	1	0	0	0	1	1	1	0	6	0	4	34	8	0	45	0	1	13	3	1	3	0	0	3	0
732	MMF base	1	0	0	0	0	0	1	0	3	4	1	5	0	0	0	1	0	1	1	2	73	2	9	3	0	1	0	9	1	1	1	4	0	0	18	2	0	54	1	0	9	2	2	8	0	0	1	0
730	MMF base	0	0	0	0	0	0	4	0	2	5	0	4	0	0	0	2	0	2	3	1	71	2	4	4	0	0	0	15	2	0	0	4	0	0	27	1	0	51	2	0	18	3	0	2	1	0	3	0
728	MMF base	1	0	0	0	0	1	3	1	3	2	0	5	2	0	0	0	2	3	3	0	81	2	8	0	0	2	0	19	0	1	0	1	1	0	20	2	0	41	0	0	15	4	2	0	1	0	2	0
726	MMF base	0	1	0	0	0	1	4	0	0	1	0	2	0	0	1	2	0	2	0	3	56	0	10	3	0	0	1	14	2	1	0	5	0	1	46	1	1	37	1	0	15	3	0	2	0	2	2	0
724	MMF base	1	0	0	0	0	1	4	1	0	3	0	4	1	0	0	2	0	1	5	1	60	2	15	4	0	1	0	18	0	4	0	3	0	2	13	1	0	48	1	0	13	3	0	2	0	0	0	0
722	MMF base	2	0	2	0	0	1	7	1	1	1	0	2	1	0	1	2	0	1	1	0	84	3	11	3	0	0	0	5	1	0	2	1	0	2	50	1	1	37	1	0	16	1	0	2	0	0	3	0
720	MMF base	3	0	0	0	0	1	6	1	0	3	0	0	0	0	1	0	0	0	4	2	73	1	4	0	0	1	0	9	0	0	0	6	0	0	7	4	0	70	1	3	6	3	2	0	0	0	1	0
718	MMF base	3	2	0	0	0	1	6	0	1	3	0	0	0	0	0	1	0	2	1	0	105	0	8	2	0	3	0	3	3	0	1	3	0	0	22	0	2	36	1	0	11	4	0	1	0	0	1	0
716	MMF base	5	0	0	0	0	0	5	1	0	3	0	1	0	1	1	0	1	0	1	2	95	1	9	0	2	0	0	3	1	0	0	2	0	0	24	2	1	38	0	0	13	1	0	2	0	0	0	0
714	MMF base	2	0	0	0	0	0	4	0	4	3	0	0	0	0	0	2	0	0	0	0	104	2	11	0	0	1	2	3	1	1	0	2	0	2	25	0	0	48	1	1	7	7	2	0	0	0	0	0
712	MMF base	3	0	0	0	0	1	4	0	1	2	0	1	0	0	0	1	0	2	0	1	71	3	7	1	1	1	2	2	1	4	0	7	0	4	27	0	0	42	0	3	15	2	0	1	0	0	1	0
710	MMF base	4	0	0	0	0	0	2	0	1	2	0	0	0	0	0	1	0	1	1	2	108	0	8	2	0	0	0	2	5	1	0	4	0	0	53	3	3	16	4	2	9	1	0	4	1	1	2	0
708	MMF base	1	0	0	0	0	0	0	0	2	6	0	0	0	0	0	2	0	6	0	2	95	3	7	0	0	0	0	2	0	0	0	1	0	0	10	0	0	48	2	1	8	5	1	4	1	0	1	0
704	MMF base	2	0	0	0	0	0	2	0	0	2	0	1	0	0	0	0	0	4	3	0	122	2	7	1	1	1	1	0	0	0	0	1	0	2	21	0	0	22	4	1	5	2	1	1	0	0	1	0
700	MMF base	1	0	0	0	0	0	0	0	0	1	0	0	0	0	0	0	0	2	5	1	134	0	9	0	2	2	0	4	2	1	0	5	1	0	23	2	0	6	0	1	9	1	0	0	0	0	1	1
698	MMF base	2	0	0	0	0	0	0	2	1	5	0	0	0	0	0	5	0	2	3	1	88	2	12	5	0	1	0	1	4	2	0	6	0	0	29	0	0	33	4	2	11	2	1	2	0	0	2	0
696	MMF base	1	0	0	0	0	1	3	0	0	5	0	0	0	0	2	0	0	3	3	0	98	4	11	0	0	2	0	3	1	0	0	1	0	2	30	4	0	26	1	0	16	3	0	1	0	1	2	0
694	MMF base	1	0	1	0	0	1	4	1	2	7	0	0	1	0	0	2	0	2	0	5	86	1	14	2	0	0	0	3	2	0	0	2	0	0	49	3	0	26	1	1	12	3	2	4	0	0	1	0
692	MMF base	1	0	0	0	0	0	3	0	0	2	0	2	1	0	1	0	0	2	11	2	100	1	6	0	2	2	0	5	1	3	0	4	0	0	16	1	0	14	3	7	14	4	1	3	0	0	4	0
688	MMF base	11	0	0	0	0	0	0	0	1	3	0	0	0	0	1	1	1	1	1	1	96	1	5	0	0	2	1	3	3	0	0	2	0	2	23	0	0	34	1	1	3	6	0	0	0	0	0	1
686	MMF base	5	1	0	0	0	0	2	0	0	3	0	2	0	0	0	3	0	3	0	1	112	2	6	1	0	2	0	13	0	0	1	3	0	1	14	1	0	43	1	0	5	3	2	2	0	0	0	0
684	MMF base	5	0	0	0	0	0	0	0	0	7	0	0	0	0	0	1	0	6	8	1	86	0	6	0	1	4	0	4	0	4	0	3	0	2	8	0	2	37	3	2	3	6	1	1	0	0	0	0
682	MMF base	10	0	0	0	0	0	1	0	0	12	0	1	0	0	0	5	0	1	3	3	98	0	7	2	0	11	0	7	0	0	0	5	0	0	9	0	0	55	1	2	9	6	0	2	0	0	0	0
680	MMF base	23	0	0	0	0	0	0	1	1	6	0	2	0	0	2	0	0	6	1	2	85	0	4	0	0	12	0	29	2	2	0	4	0	0	1	1	0	26	0	0	3	3	2	1	0	0	0	0
678	MMF base	2	1	0	0	0	0	3	0	3	5	0	0	1	0	0	11	0	4	1	0	98	0	6	0	1	3	0	16	3	0	0	1	0	0	9	0	1	36	0	2	7	2	0	2	0	0	2	0
676	MMF base	6	0	0	0	0	0	1	1	3	2	0	0	0	0	0	3	0	9	3	1	95	1	5	1	0	5	0	12	2	1	0	3	0	2	26	1	0	18	1	0	3	6	0	1	0	0	1	0
674	MMF base	1	0	0	0	0	0	0	0	3	3	0	0	0	0	1	6	0	3	0	2	81	0	6	3	0	8	0	20	2	1	0	3	0	1	29	0	1	42	2	2	9	4	1	2	0	1	0	0
672	MMF base	5	1	0	0	0	0	0	0	0	9	0	0	0	0	2	1	0	6	5	2	64	2	5	0	0	4	0	34	3	1	0	1	0	4	15	0	1	34	0	1	1	8	0	3	2	0	0	0
670	MMF base	2	0	0	0	0	0	0	0	1	1	0	2	1	0	0	11	0	5	4	2	75	2	4	1	0	0	1	23	2	0	0	1	0	1	13	0	1	50	3	1	10	5	2	1	0	0	0	0
668	MMF base	2	0	0	0	0	0	1	0	6	8	0	1	0	1	1	1	1	1	3	2	91	0	6	0	0	3	0	8	0	0	0	5	0	1	8	1	1	47	1	3	7	1	0	1	0	0	2	0
666	MMF base	4	0	0	0	0	0	3	0	3	1	0	1	0	0	0	4	0	2	1	4	103	0	10	4	0	2	0	12	0	0	0	4	0	0	8	1	0	49	0	2	5	2	3	2	0	0	0	0
664	MMF base	2	0	0	0	0	0	0	0	7	1	0	0	0	0	2	3	0	2	4	1	79	1	16	0	2	4	0	31	1	2	0	2	0	1	21	0	0	13	0	0	3	5	2	1	1	0	0	1
660	MMF base	1	0	0	0	0	0	1	0	9	6	0	2	0	0	1	0	0	1	4	1	95	1	7	2	0	0	0	12	2	2	0	1	0	2	37	2	0	23	0	0	9	6	1	2	0	0	0	0
658	MMF base	0	0	0	0	0	0	1	0	5	0	0	3	0	0	0	1	0	2	0	2	106	0	12	4	0	4	0	7	5	0	1	6	0	1	42	2	2	14	0	3	14	8	1	1	0	0	2	0
656	MMF base	1	0	0	0	0	0	3	0	11	2	0	5	0	0	2	0	0	1	1	0	101	0	8	1	0	3	2	24	4	0	0	1	0	0	23	0	2	20	0	0	7	5	0	1	0	0	1	0
654	MMF base	2	0	0	0	0	0	1	0	8	0	1	2	1	0	0	4	0	2	0	1	116	0	7	0	0	4	0	0	1	2	0	5	0	0	37	0	2	16	2	2	12	3	0	1	0	0	2	0
652	MMF base	1	0	0	0	0	0	1	0	2	1	0	0	0	0	0	1	0	1	2	1	125	1	9	2	0	6	0	0	1	0	0	4	0	1	22	0	1	10	2	0	4	3	1	2	0	0	5	0
648	MMF base	1	1	0	0	0	0	3	1	7	8	0	5	0	0	1	3	2	0	0	2	104	2	2	0	0	1	0	0	1	3	0	3	0	2	21	1	1	30	1	1	7	2	2	1	0	0	2	0
646	MMF base	1	0	0	0	0	0	0	0	2	2	0	1	0	0	0	2	0	2	0	0	116	0	10	2	1	1	0	1	0	0	0	5	1	0	17	0	1	36	0	1	10	4	4	0	0	0	2	0
644	MMF base	2	0	0	0	0	1	6	0	1	1	0	4	0	0	0	1	2	1	2	0	113	0	11	1	0	1	0	1	0	1	0	0	0	2	57	3	1	11	0	4	5	0	0	0	0	0	1	0
642	MMF base	1	0	0	0	0	0	5	0	0	1	0	1	0	0	1	2	0	3	4	1	144	1	2	1	0	2	2	3	0	0	0	4	0	0	27	2	1	16	0	1	7	9	2	1	0	0	0	0
640	MMF base	5	0	0	0	0	0	2	0	2	1	0	0	3	0	0	4	0	3	0	0	85	1	17	1	0	1	1	4	4	0	0	1	0	1	50	4	4	18	1	1	17	5	6	1	0	0	3	0
638	MMF base	2	0	0	0	0	1	2	0	2	2	0	1	0	0	0	3	0	1	2	0	128	1	12	0	0	1	0	3	0	0	0	1	0	1	53	1	4	10	1	1	10	6	1	0	0	0	2	0
636	MMF base	2	0	0	0	0	0	0	2	0	1	0	2	0	0	1	1	0	3	3	0	107	0	9	1	1	1	0	3	0	0	0	2	0	1	43	2	2	17	0	0	13	7	2	1	0	0	1	0
634	MMF base	3	0	0	0	0	0	1	0	2	0	0	1	0	0	2	4	0	1	0	0	120	2	8	0	0	0	0	3	2	0	1	3	0	0	42	1	2	21	1	2	5	8	0	0	1	0	0	0
632	MMF base	3	0	0	0	0	0	2	0	3	1	0	2	0	0	1	0	0	2	0	2	103	5	9	0	0	1	0	0	0	2	0	4	1	0	39	0	1	22	1	1	6	6	2	3	0	0	2	1
630	MMF base	2	0	0	0	0	0	2	0	1	2	0	1	0	0	0	5	1	0	1	0	116	4	14	2	1	1	0	3	0	0	0	6	0	0	51	1	2	14	0	0	14	5	0	1	0	1	1	0
628	MMF base	4	0	0	0	0	0	0	0	7	3	0	1	1	0	0	0	1	0	3	1	83	1	9	0	1	9	0	5	1	0	0	0	1	0	37	2	1	30	2	3	16	0	0	1	0	0	2	0
626	MMF base	3	0	0	0	0	0	1	0	3	1	1	0	1	0	0	3	0	3	0	3	117	2	12	1	0	1	0	3	2	0	1	3	2	1	37	3	1	17	1	0	17	2	0	3	0	0	1	0
624	MMF base	6	0	0	0	0	0	1	0	6	3	0	0	1	0	0	2	0	2	5	0	88	0	11	0	2	4	0	6	3	0	0	2	0	0	39	3	1	15	1	1	7	2	0	2	0	0	0	0
622	MMF base	2	0	0	0	0	0	0	0	1	2	0	0	1	0	1	4	0	1	1	0	108	0	10	0	0	1	0	4	0	0	0	1	1	0	49	0	1	17	1	1	8	6	2	1	0	0	0	0
620	MMF base	21	0	1	0	0	1	1	0	3	3	0	0	1	0	0	3	0	2	4	3	76	1	5	2	2	7	0	2	0	0	0	3	0	1	38	3	0	39	1	0	9	4	0	2	0	0	1	0
618	MMF base	3	0	0	0	0	0	0	0	2	1	0	0	0	0	1	6	0	2	2	1	135	1	8	0	2	1	0	10	13	0	0	1	0	1	30	0	1	8	0	1	10	4	0	4	0	0	0	0
616	MMF base	2	0	0	0	0	0	1	0	8	6	0	1	0	0	0	5	0	6	2	2	94	1	11	1	2	4	0	4	1	1	1	1	0	1	29	0	0	15	1	3	10	5	0	8	1	0	0	0
614	MMF base	2	0	0	0	0	0	1	0	10	2	0	1	1	0	2	8	0	2	1	2	93	0	9	5	2	2	0	5	4	0	0	4	2	2	32	0	0	23	2	1	6	4	0	4	0	0	1	0
612	MMF base	8	0	0	0	0	1	1	0	8	8	0	2	1	0	1	7	0	2	3	0	86	0	4	1	0	6	0	25	5	1	0	1	0	0	13	1	0	45	2	0	7	2	0	6	0	0	2	0
608	MMF base	5	0	0	0	0	0	0	1	2	4	0	7	0	0	0	4	1	6	3	1	94	4	13	3	2	3	0	10	2	0	1	8	1	0	31	1	0	13	0	1	8	0	1	1	0	0	2	0
604	MMF base	7	0	0	0	0	0	2	0	8	2	0	1	0	0	1	3	0	2	2	0	77	2	8	1	2	1	1	18	1	0	1	2	1	1	15	0	1	40	2	2	5	1	0	7	0	0	4	0
602	MMF base	1	0	0	0	0	0	3	0	6	0	0	2	0	0	1	8	0	2	0	0	119	1	11	3	0	2	1	11	3	0	0	5	0	0	59	1	0	10	1	0	4	3	0	2	0	0	3	0
600	MMF base	2	0	0	0	0	0	1	0	15	1	0	3	0	0	0	3	0	6	1	0	87	1	6	1	0	3	1	19	1	0	0	6	0	3	22	3	0	22	1	1	5	0	1	3	0	0	1	0
599	MMF base	2	0	0	0	0	0	1	1	4	1	0	2	1	0	1	0	0	2	0	0	111	2	10	2	0	0	0	16	1	1	0	7	1	1	52	0	1	23	0	1	4	4	1	3	0	0	1	0
597	MMF base	3	0	0	0	0	0	4	0	4	1	0	4	0	0	0	1	0	1	0	2	100	2	17	1	0	2	0	5	1	3	0	1	0	1	31	0	0	14	2	3	1	2	5	3	0	0	1	0
595	MMF base	0	0	0	0	0	0	3	0	5	1	1	3	0	0	0	7	0	5	1	0	117	2	14	4	0	0	0	12	3	1	0	1	0	0	49	0	2	16	0	0	6	2	0	0	0	0	0	0
593	MMF base	0	0	0	0	0	0	0	0	3	2	0	3	1	0	0	4	0	4	6	0	116	2	20	0	0	1	1	4	0	0	0	8	2	3	33	2	6	4	0	2	6	1	7	1	0	0	2	0
589	MMF base	0	0	0	0	0	0	0	0	7	0	0	0	0	0	0	4	0	2	4	0	94	2	24	0	1	0	0	11	2	1	0	4	0	2	58	2	0	7	0	1	3	1	2	0	1	0	0	0
587	MMF base	0	0	0	0	0	0	1	0	8	0	0	1	1	0	0	13	0	1	2	0	119	2	15	0	0	2	0	7	0	0	0	10	2	1	49	3	3	7	0	4	5	4	1	2	0	0	0	0
585	MMF base	0	0	0	0	0	0	1	1	2	3	0	3	0	0	3	5	0	15	8	2	79	0	13	1	1	1	0	11	1	0	0	7	1	3	40	0	2	8	0	5	4	1	5	4	0	0	0	0
581	MMF base	3	0	0	0	0	1	3	0	4	0	0	8	0	0	0	8	1	8	5	1	89	5	9	0	1	3	0	2	1	1	0	4	1	2	20	1	0	40	2	2	4	6	1	3	0	0	2	0
575	MMF base	2	0	0	0	0	2	0	0	10	2	0	1	0	0	0	5	0	3	0	0	96	0	12	2	0	0	0	12	1	0	0	6	0	1	44	0	3	20	1	0	3	1	1	0	0	0	0	0
573	MMF base	1	0	0	0	0	0	3	2	1	1	0	5	0	0	0	3	0	4	7	1	77	2	11	0	2	4	0	10	0	0	0	5	0	1	24	2	1	46	2	0	4	1	2	1	0	0	1	0
571	MMF base	4	0	0	0	0	0	0	0	5	0	0	1	0	0	1	12	0	6	4	1	99	0	15	0	0	1	0	8	0	0	0	7	0	0	46	0	2	21	0	1	5	1	0	0	0	0	1	0
569	MMF base	7	0	0	0	0	0	0	1	4	0	0	0	0	0	0	2	0	5	0	1	99	1	8	1	1	4	0	9	1	1	0	4	0	0	11	0	0	41	2	2	5	1	1	0	0	0	0	0
565	MMF base	0	0	0	0	0	1	1	0	6	3	0	1	1	0	0	1	0	2	2	0	96	3	12	3	0	4	0	11	1	1	0	6	1	2	48	1	2	4	0	4	6	2	0	1	0	0	1	0
563	MMF base	1	0	0	0	0	0	1	1	5	0	0	1	2	0	0	0	0	1	1	1	102	0	17	0	0	0	0	13	0	0	0	7	0	2	32	0	1	29	1	3	5	6	0	2	0	0	0	0
561	MMF base	8	0	0	0	0	0	2	1	4	0	0	4	2	0	0	0	0	2	6	0	106	0	14	0	1	2	0	6	3	0	0	1	0	2	25	1	0	20	3	4	2	5	0	0	0	0	1	0
559	MMF base	1	0	0	0	0	0	0	0	6	0	0	0	0	0	0	3	0	2	4	0	134	0	11	1	0	1	0	13	1	0	2	2	0	0	30	0	1	3	2	2	5	1	0	0	0	0	1	0
557	MMF base	10	0	0	0	0	2	4	1	2	5	0	2	0	0	0	3	0	0	4	0	83	0	8	1	2	1	1	8	2	1	0	3	4	0	30	6	0	23	1	0	6	3	3	4	0	0	4	0
555	MMF base	1	0	0	0	0	0	2	0	3	1	0	2	0	0	0	1	1	2	1	1	134	1	10	0	0	0	0	5	1	0	1	11	0	3	46	1	3	11	0	2	6	4	1	1	0	0	1	0
553	MMF base	3	0	0	0	0	0	2	0	3	3	0	6	0	0	0	1	1	5	2	0	105	0	7	0	1	2	0	5	1	0	0	1	1	1	28	1	1	14	3	1	1	9	0	0	0	0	4	0
551	MMF base	0	0	0	0	0	0	0	0	5	1	0	2	2	0	0	6	0	0	1	0	125	2	14	4	0	1	0	10	0	0	1	5	0	1	46	2	1	7	0	0	4	3	3	2	0	0	2	0
549	MMF base	15	0	0	0	0	0	4	1	2	7	0	6	1	0	1	2	0	9	4	1	69	0	16	0	1	3	0	9	0	0	5	2	0	2	22	1	1	30	0	1	4	5	1	0	0	0	2	0
545	MMF base	14	0	0	0	0	3	5	2	1	0	2	6	0	0	0	0	0	2	1	2	56	0	4	3	0	2	0	7	4	0	2	1	5	2	48	4	0	13	2	1	4	15	1	4	0	0	5	0
543	MMF base	7	0	0	0	0	0	3	1	6	0	0	2	1	0	0	2	0	3	0	1	64	2	19	1	0	0	0	2	3	1	0	0	0	2	21	2	2	51	1	5	5	20	0	0	0	0	4	0
541	MMF base	20	0	0	0	0	2	4	1	3	0	0	1	0	0	3	3	0	1	1	3	61	0	5	0	0	6	1	16	2	0	0	2	0	2	9	0	2	38	1	5	14	7	1	2	0	0	4	0
449	LILP	0	0	1	0	0	0	0	0	2	13	0	3	0	0	1	0	0	3	4	4	76	4	11	2	0	3	0	1	3	0	0	2	0	2	37	3	0	24	0	2	6	6	0	5	0	0	0	0
445	LILP	3	0	1	0	0	0	3	0	3	5	0	0	0	0	0	2	1	4	1	1	80	1	16	2	1	0	0	8	0	0	0	2	0	0	54	2	2	14	3	4	4	8	3	0	0	0	3	0
441	LILP	4	0	0	1	0	2	4	1	5	4	0	3	0	0	0	2	0	2	1	1	64	1	14	1	0	2	2	2	0	0	1	3	1	3	19	2	1	52	1	1	9	11	0	3	0	0	2	0
437	LILP	2	0	0	0	0	2	5	2	6	7	0	3	0	1	0	3	0	3	0	1	64	2	16	0	3	2	0	0	0	2	0	2	0	1	27	3	2	52	0	2	4	6	6	2	0	0	3	0
433	LILP	5	0	0	0	0	0	6	1	2	2	0	5	1	0	0	1	0	2	4	2	72	4	15	0	0	0	1	0	1	0	0	3	1	1	13	1	3	71	0	3	5	5	1	2	0	0	1	0
429	LILP	2	0	0	0	0	1	2	0	5	7	0	4	0	0	0	0	0	4	2	1	80	1	8	0	2	0	3	1	0	1	2	1	0	1	12	0	1	57	2	0	11	5	2	0	0	0	2	0
421	LILP	7	0	0	0	0	1	1	0	2	5	0	1	0	0	0	1	0	1	0	2	69	3	19	2	3	2	0	0	1	0	0	2	1	3	15	0	2	74	1	0	6	4	2	2	0	0	2	0
413	LILP	3	0	0	0	0	0	4	1	0	3	0	2	0	0	1	1	0	1	2	2	68	0	20	1	0	0	1	7	0	0	0	1	1	1	28	0	1	51	0	0	9	12	1	4	1	0	0	0
409	LILP	4	0	2	0	0	5	0	0	3	7	0	2	0	0	0	5	0	2	5	4	52	4	15	0	1	1	0	11	1	0	0	3	0	2	29	1	2	46	0	1	4	18	2	2	0	0	4	0
401	LILP	0	0	1	0	0	0	2	0	1	4	0	2	0	0	0	0	0	5	9	4	46	3	12	1	1	2	1	11	4	1	0	1	0	1	42	2	0	33	2	1	10	14	1	4	1	0	2	0
397	LILP	13	0	0	0	0	2	3	1	5	3	0	0	0	0	0	4	0	3	2	6	48	1	13	3	1	3	1	18	0	0	0	1	0	1	42	1	0	17	0	0	7	30	2	1	0	0	2	0
393	LILP	0	0	0	0	0	4	2	0	9	4	0	1	0	0	1	1	0	4	7	1	59	1	12	2	2	2	1	11	0	1	0	2	0	3	14	1	1	53	0	3	8	12	1	0	0	0	1	0
389	LILP	4	2	0	0	0	1	2	0	8	15	0	0	0	0	2	6	0	4	1	2	43	2	14	0	0	3	0	10	1	3	0	1	0	3	12	0	3	57	0	1	5	10	1	3	0	0	3	0
385	LILP	5	0	0	0	0	1	0	0	5	7	0	8	1	0	2	0	0	4	0	4	55	3	14	1	2	1	1	1	0	4	0	2	1	1	16	3	2	58	0	1	7	11	1	2	0	0	3	0
381	LILP	1	0	1	0	0	2	3	0	4	7	0	1	0	0	0	2	0	2	2	0	59	3	14	0	1	2	2	2	0	2	0	3	1	2	20	0	0	72	2	0	6	7	4	1	0	0	0	0
377	LILP	1	0	0	0	0	1	2	0	11	16	0	5	0	0	0	0	0	1	3	4	44	1	14	3	0	1	1	2	2	2	1	3	0	0	21	1	1	52	1	0	5	5	1	5	0	0	0	0
369	LILP	0	0	0	0	0	2	3	1	3	7	0	3	0	0	0	4	0	0	2	0	37	5	17	2	1	3	0	0	0	1	0	6	0	2	25	3	1	67	0	3	6	3	4	3	0	0	0	0
365	LILP	1	0	1	0	0	1	1	0	4	2	0	3	0	0	1	1	0	2	1	1	59	3	17	2	4	1	1	0	1	0	0	0	0	2	10	1	1	77	1	0	6	1	1	2	0	0	3	0
361	LILP	0	0	0	0	0	0	0	0	2	2	0	3	0	0	0	3	2	2	2	0	45	9	10	3	0	0	2	0	0	0	0	6	0	1	19	1	2	80	0	1	8	6	3	5	2	0	0	0
357	LILP	3	0	0	0	0	0	0	1	4	5	0	2	0	0	1	1	0	0	3	3	43	5	9	0	2	0	1	11	2	1	1	2	0	0	15	1	1	77	1	0	9	5	1	5	0	0	1	0
352	LILP	0	0	0	0	0	1	3	0	2	3	0	3	0	0	4	2	0	0	1	2	49	2	18	1	1	1	0	5	1	1	1	2	0	0	8	0	0	87	1	0	4	7	2	5	0	0	3	0
349	LILP	1	0	0	0	0	0	2	1	8	1	0	3	0	0	1	0	0	6	7	4	59	0	8	2	2	2	1	7	2	1	0	5	0	1	37	1	0	53	2	4	6	4	1	3	0	0	1	0
345	LILP	0	0	0	0	0	1	3	1	6	4	0	2	0	0	0	2	0	8	4	3	41	4	10	4	1	1	2	11	3	0	0	3	2	2	20	2	1	63	3	1	3	7	4	3	0	0	2	0
341	LILP	0	0	0	0	0	0	1	0	2	3	0	1	0	0	1	2	0	7	4	3	53	3	17	1	1	2	1	10	3	0	1	3	2	1	34	1	0	45	0	1	8	4	4	0	0	0	2	0
337	LILP	1	0	0	0	0	0	3	0	3	5	1	2	0	0	3	6	0	2	6	3	47	5	17	1	0	0	1	3	3	1	0	6	2	0	24	0	1	55	1	1	7	9	2	0	0	0	1	0
333	LILP	0	0	0	0	0	0	1	0	3	5	0	0	0	0	0	4	0	4	13	5	50	2	9	0	1	2	0	11	2	0	3	3	0	2	25	1	0	41	1	1	7	3	2	4	0	0	2	0
325	LILP	1	0	0	0	0	0	0	0	4	5	0	0	0	0	0	6	0	5	15	3	38	3	12	4	0	0	1	16	1	2	0	5	0	2	42	0	0	40	2	0	11	3	0	2	0	0	1	2
321	LILP	0	0	0	0	0	0	0	1	2	0	0	0	0	0	0	2	0	6	15	9	23	3	10	1	1	3	0	33	0	0	0	4	1	1	43	0	1	48	0	1	7	6	1	3	0	0	1	0
317	LILP	0	0	2	0	0	0	3	0	4	2	0	2	0	0	0	5	0	5	11	1	32	3	16	1	0	4	0	9	2	0	1	3	0	0	48	1	1	42	0	0	7	3	1	1	0	0	2	0
313	LILP	0	0	0	0	0	0	1	0	3	2	1	5	0	0	0	2	0	3	12	5	28	8	13	0	1	1	2	13	2	0	0	5	0	1	76	1	0	13	1	1	14	4	3	2	0	0	1	0
309	LILP	3	0	0	1	0	3	0	1	4	0	0	5	0	0	0	1	0	4	3	3	42	2	16	3	1	0	0	6	6	1	0	10	0	0	43	1	2	28	0	1	17	1	1	5	0	1	2	0
305	LILP	0	0	0	0	0	0	1	0	1	3	0	3	0	0	0	1	0	9	12	2	36	6	12	3	0	0	1	8	1	2	1	2	1	1	75	4	1	12	0	1	5	2	3	8	0	0	4	0
302	LILP	0	0	1	0	0	2	7	1	1	6	0	4	0	0	1	3	0	1	7	0	36	2	5	1	0	2	1	5	4	2	0	2	0	0	66	4	0	18	0	1	17	6	2	7	0	0	2	1
300	LILP	1	0	0	0	0	1	2	0	2	2	0	6	0	0	0	3	0	6	4	1	35	5	15	1	1	2	0	12	4	1	0	2	0	2	66	1	0	15	0	1	6	6	2	8	0	0	2	0
297	LILP	1	0	0	0	0	0	0	0	0	6	0	3	0	0	0	1	2	5	2	3	41	1	8	2	4	2	1	13	2	0	1	5	0	1	79	2	1	2	0	0	9	8	1	5	0	0	4	0
293	LILP	1	0	0	0	0	1	2	0	2	3	0	5	0	0	2	1	1	1	4	3	40	1	14	3	1	3	0	8	5	1	0	5	0	1	75	1	0	14	0	0	7	3	2	4	0	0	2	0
289	LILP	1	0	0	0	0	2	0	1	4	0	0	4	0	0	0	0	0	3	7	4	51	5	13	0	0	0	0	4	1	2	1	3	2	0	58	1	2	28	0	2	10	3	1	6	0	0	2	1
285	LILP	1	0	0	0	0	0	2	0	10	4	0	8	0	0	1	1	0	2	6	1	44	5	10	1	2	1	0	3	1	0	1	5	0	0	52	3	2	18	0	2	5	5	1	7	0	0	2	0
281	LILP	4	0	0	0	0	1	0	0	2	7	0	5	2	0	2	0	1	9	5	2	67	2	16	1	0	1	1	0	2	2	1	2	1	1	56	4	4	3	1	1	7	2	0	1	1	0	0	0
277	LILP	0	0	0	0	0	2	1	1	3	2	0	15	0	0	0	4	1	1	1	1	41	5	9	2	1	5	0	13	1	0	1	2	1	1	71	3	2	6	1	0	4	3	0	10	0	0	1	0
273	LILP	4	0	0	0	0	0	2	0	1	4	0	5	0	0	0	0	1	1	7	7	41	6	16	4	0	2	0	10	3	1	0	4	0	0	77	2	3	4	1	1	6	3	1	10	0	0	3	0
269	LILP	5	0	0	0	0	1	2	0	2	2	1	1	0	0	0	1	0	3	1	3	61	3	7	0	0	1	1	4	9	0	0	2	1	4	69	5	3	10	0	3	8	2	0	2	1	0	1	0
265	LILP	1	0	0	0	0	1	0	0	2	6	0	10	1	0	1	2	0	0	3	4	42	4	6	2	0	0	1	2	6	3	1	4	5	0	48	3	3	59	1	1	18	6	2	7	1	0	2	0
261	LILP	1	0	0	0	0	1	1	0	3	4	0	10	0	0	0	1	0	2	8	0	44	4	25	5	0	1	0	0	2	1	1	3	1	0	63	0	5	15	1	0	8	4	0	4	0	0	3	2
257	LILP	4	0	1	0	0	2	1	0	1	2	0	0	0	0	0	0	2	3	4	1	57	2	8	1	1	5	2	0	2	0	0	2	0	2	64	4	7	9	0	2	5	2	4	10	0	0	0	0
253	LILP	9	0	0	1	0	0	0	0	1	6	0	0	0	0	0	1	1	1	0	5	46	6	2	0	1	3	4	2	5	0	0	1	1	0	51	2	0	5	0	0	6	4	1	1	0	0	0	1
249	LILP	2	0	0	0	0	0	0	0	3	14	0	1	0	0	0	1	0	1	2	5	53	0	6	3	1	3	2	0	4	1	1	1	0	1	45	4	4	22	0	2	7	1	1	4	1	0	1	1
245	LILP	4	0	0	0	0	3	6	1	2	5	1	0	0	0	0	0	0	2	3	4	52	2	9	3	4	2	2	4	3	0	0	0	1	0	59	3	5	5	0	3	6	1	2	4	0	0	0	1
242	LILP	5	0	0	0	0	2	4	1	6	0	0	0	0	0	0	1	0	2	2	2	45	3	5	0	1	3	0	1	6	1	0	2	0	0	36	5	3	2	0	1	9	1	3	7	1	0	0	3
238	LILP	5	0	0	0	0	0	3	0	4	2	0	0	0	0	1	1	0	2	2	5	44	1	3	0	6	2	4	0	3	0	0	1	0	0	49	4	5	0	0	1	8	1	0	1	0	0	0	2
234	LILP	11	0	1	0	0	0	3	0	3	4	0	0	0	0	1	0	0	3	2	4	54	0	8	1	2	1	0	3	8	0	1	0	1	0	59	3	3	11	0	1	9	2	0	5	0	0	1	7
230	LILP	14	0	0	1	0	0	1	2	5	1	0	0	0	0	0	1	0	2	0	9	50	1	8	4	6	2	2	0	9	2	2	1	0	1	46	4	1	3	0	0	9	5	0	6	0	0	0	3
226	LILP	6	0	0	0	0	2	3	0	1	4	0	2	0	0	2	2	0	1	1	7	46	1	4	3	9	2	1	2	11	2	1	0	0	2	59	5	4	4	0	1	1	1	0	8	0	0	0	3
224	LILP	16	0	0	0	0	1	3	0	4	2	0	2	0	1	1	0	0	1	2	4	54	3	5	2	5	1	2	0	3	2	0	2	1	1	43	1	1	9	0	5	2	2	0	8	0	0	4	4
220	LILP	3	0	2	0	0	0	4	1	6	8	0	3	1	0	1	1	0	1	6	3	83	3	6	4	4	2	2	3	4	4	0	2	0	2	41	2	1	5	0	6	4	2	1	6	0	0	0	6
216	LILP	6	0	0	0	0	0	1	0	3	5	2	2	0	0	1	1	0	1	2	7	48	1	13	5	4	2	2	0	3	0	1	0	0	1	56	7	3	0	1	4	4	3	2	3	1	0	0	1
212	LILP	5	0	0	0	0	0	4	2	3	4	0	1	0	0	1	0	1	0	4	1	41	5	8	3	4	3	1	0	8	2	0	0	1	3	72	6	3	9	0	2	12	2	2	4	0	0	3	2
207	LILP	10	0	0	0	0	0	5	1	2	1	0	0	2	0	0	1	1	0	3	6	48	5	10	8	3	3	1	1	9	2	0	3	0	1	60	8	1	4	0	2	8	0	1	2	0	0	2	1
203	LILP	13	0	2	0	0	0	7	0	2	5	2	1	1	0	1	2	0	3	0	12	92	3	13	3	6	0	1	3	19	1	0	4	0	2	73	3	2	2	0	4	20	5	0	12	0	0	1	3
199	LILP	15	0	0	1	0	0	0	0	3	7	1	1	1	0	3	6	0	5	6	1	81	7	9	2	7	1	7	4	7	0	1	1	0	2	73	4	1	9	1	2	9	1	1	6	0	0	1	3
196	LILP	6	0	0	0	0	0	4	0	6	5	0	0	0	0	2	0	2	1	1	7	77	6	11	3	12	1	1	1	20	0	0	2	0	2	77	4	2	11	0	6	8	3	1	6	1	0	2	0
194	LILP	7	0	0	0	0	1	2	1	5	3	0	1	1	0	1	1	2	6	0	4	83	7	12	2	8	1	2	0	24	2	2	1	3	1	56	12	4	5	0	3	6	0	0	16	0	0	0	0
192	LILP	7	0	3	0	0	11	0	0	4	0	0	0	0	0	0	2	0	0	3	3	44	0	3	0	5	1	0	1	9	2	1	1	2	1	44	3	0	0	1	1	3	2	1	5	0	0	0	2
189	LILP	34	0	1	0	0	1	4	0	1	4	0	0	1	0	2	0	0	3	4	2	87	0	5	3	3	5	8	0	12	0	2	1	1	1	77	4	2	2	0	6	2	0	2	7	0	1	1	0
186	LILP	10	0	1	0	0	2	1	0	1	8	0	0	0	0	1	0	0	2	1	6	60	3	4	0	4	3	6	4	4	1	0	2	0	0	30	3	1	7	0	0	1	0	0	0	2	0	1	0
184	EILP	16	0	1	2	0	1	2	0	4	2	0	0	0	0	1	8	0	3	11	2	50	1	8	1	1	1	0	8	4	0	1	3	0	2	5	2	1	58	0	3	4	1	1	5	0	0	4	0
182	EILP	16	0	2	0	0	2	0	0	0	10	1	0	0	0	0	2	0	0	4	5	55	1	3	1	2	1	4	2	4	1	0	0	0	0	9	1	0	16	0	3	2	2	1	10	0	0	0	0
180	EILP	9	0	0	1	0	0	0	0	2	3	0	1	0	0	1	2	0	2	1	1	39	3	2	4	2	5	3	4	5	0	0	0	1	0	11	3	0	19	3	1	1	1	0	6	0	0	0	1
178	EILP	5	0	0	0	0	0	3	0	0	2	0	1	1	0	1	13	0	1	5	2	72	2	2	1	1	1	1	1	4	0	1	3	0	1	2	3	0	64	0	5	6	2	3	3	0	0	0	1
176	EILP	26	1	3	4	0	1	0	1	1	4	0	0	1	0	0	0	0	2	0	2	43	4	1	0	3	5	0	3	6	0	0	0	0	3	4	2	1	14	1	3	0	3	2	6	1	0	0	2
175	EILP	10	0	2	0	0	3	0	2	0	6	0	0	1	0	1	0	0	10	6	5	29	1	4	4	1	4	0	9	10	0	1	0	1	0	26	1	2	25	1	2	3	2	1	5	0	0	0	1
174	EILP	5	0	0	2	0	0	0	0	1	10	26	1	1	0	0	0	0	3	6	3	29	4	4	0	1	4	0	5	8	1	0	1	0	1	8	1	1	38	1	2	7	3	1	3	0	0	0	0
173	EILP	2	0	0	2	0	0	3	0	0	6	15	0	0	0	0	0	0	2	2	6	45	2	1	0	1	3	2	1	7	0	0	0	0	1	5	2	3	28	5	1	5	0	0	6	0	0	0	0
172	EILP	13	0	9	0	0	0	3	1	1	7	41	2	0	0	2	2	0	3	2	0	52	3	1	1	0	4	2	5	5	0	1	1	0	0	21	2	1	22	7	5	16	4	1	1	1	0	0	0
171	EILP	0	1	1	6	0	4	8	1	0	8	25	0	0	0	0	7	0	3	3	1	34	1	5	0	1	0	0	5	1	0	0	1	0	1	0	1	0	68	6	3	20	4	1	3	0	0	2	0
170	EILP	3	0	4	2	0	1	2	0	1	5	20	3	0	0	1	2	0	3	7	2	33	2	7	0	2	0	0	6	7	0	1	0	0	1	37	2	1	8	2	0	10	1	1	5	0	0	0	0
169	EILP	4	0	2	1	0	0	6	0	2	2	37	1	0	0	0	12	0	11	2	1	68	1	4	2	1	1	1	4	2	0	0	0	0	1	0	0	0	32	7	4	6	1	0	2	0	0	0	0
168	EILP	9	0	1	2	0	1	2	0	1	3	71	5	0	0	0	2	0	7	4	1	37	2	4	1	1	2	0	3	2	0	0	1	0	1	30	2	1	10	1	0	12	1	0	1	0	0	1	0
166	EILP	3	0	3	10	0	2	2	0	2	3	42	2	3	0	3	0	0	1	4	5	39	1	6	1	0	2	1	19	5	2	0	0	1	3	9	1	0	28	2	0	10	2	0	4	0	0	0	0
165	EILP	3	0	0	2	0	0	1	1	0	1	13	0	1	0	1	1	0	5	3	0	51	3	6	0	0	1	0	9	0	0	0	0	0	0	7	1	0	14	0	1	5	2	0	3	0	0	0	0
164	EILP	1	0	5	9	0	1	8	0	3	11	48	1	1	1	2	5	0	1	0	0	32	1	5	0	0	0	0	10	1	1	0	2	0	1	1	1	0	39	1	1	7	0	0	5	2	0	0	0
163	EILP	2	0	2	10	0	0	0	0	2	5	1	2	0	0	1	5	0	3	1	28	45	1	5	3	0	2	2	86	2	0	0	1	0	0	14	1	1	10	0	3	8	1	0	3	0	0	0	0
162	EILP	3	0	0	10	0	0	0	0	1	4	35	0	0	0	0	1	0	2	5	12	39	3	9	1	2	4	2	10	2	0	0	0	0	0	24	0	2	17	1	0	18	2	0	6	0	0	0	0
161	EILP	2	0	1	32	1	1	2	0	0	0	0	0	0	0	0	0	1	0	2	32	30	4	5	0	2	3	1	69	0	0	0	0	0	2	1	0	0	22	0	1	8	0	1	3	0	0	0	0
160	EILP	9	0	2	29	3	0	2	0	2	6	0	0	0	0	0	4	0	0	0	5	21	1	0	1	0	1	0	92	1	0	0	0	1	3	2	0	0	7	0	0	8	1	1	4	1	0	0	0
159	EILP	3	1	3	36	7	0	2	0	2	0	0	0	1	0	0	1	0	2	0	7	38	1	2	0	0	0	1	38	0	0	0	0	0	1	3	0	0	32	0	2	16	3	0	7	0	0	0	0
158	EILP	3	0	0	42	6	0	4	1	4	4	0	0	0	0	0	8	0	2	0	14	34	0	2	0	1	2	0	62	0	1	0	0	0	0	0	1	1	22	1	1	2	2	1	7	0	0	0	0
157	EILP	8	0	0	54	7	1	5	1	3	5	0	1	1	0	1	0	1	4	1	0	40	1	3	1	0	3	0	17	3	0	0	0	1	2	2	0	0	29	1	2	3	6	1	4	0	0	0	0
156	EILP	9	1	4	85	14	1	10	0	1	7	1	1	0	0	0	2	1	1	1	0	24	0	0	0	0	0	2	22	0	0	0	0	1	0	1	2	0	16	1	0	7	2	0	5	0	0	0	0
155	EILP	5	0	0	59	9	3	3	0	0	12	0	0	4	2	1	0	0	0	1	0	36	1	0	1	0	2	0	24	1	0	0	1	1	1	3	2	0	20	2	2	7	3	0	10	0	0	0	0
154	EILP	15	1	2	68	10	5	13	1	5	2	0	2	0	0	0	2	0	0	1	2	17	1	3	0	0	1	0	25	1	0	0	0	1	1	0	0	0	15	0	4	5	4	0	3	1	0	0	0
153	EILP	11	3	1	29	9	0	9	3	2	11	0	2	6	0	0	2	0	2	4	3	37	2	3	0	0	3	1	7	2	2	2	1	1	0	6	6	2	32	1	3	10	5	0	5	0	0	0	0
150	EILP	7	0	1	57	0	7	5	0	2	2	0	0	3	2	0	0	0	3	3	2	23	4	4	1	0	4	0	9	2	0	0	0	1	0	7	2	0	43	4	3	7	1	0	4	1	0	0	1
149	EILP	8	1	1	15	0	2	12	1	1	9	0	2	3	0	1	2	2	5	4	2	34	1	4	0	0	1	3	15	1	1	0	1	2	1	10	6	1	30	2	3	7	6	0	3	0	0	1	0
146	EILP	11	4	0	31	6	0	15	1	9	6	0	4	0	2	0	6	0	0	0	2	33	1	0	0	2	2	0	11	1	1	1	0	1	0	5	1	3	39	2	0	11	12	0	6	2	0	0	0
143	EILP	13	2	5	7	0	1	10	6	9	10	0	1	0	1	0	4	2	2	4	7	36	0	3	0	2	2	0	6	1	4	0	1	2	0	3	1	2	42	0	1	16	9	1	6	0	0	0	0
141	EILP	11	3	7	17	1	0	33	2	3	10	0	2	2	0	0	1	0	1	0	0	20	0	2	2	0	0	0	31	0	1	0	0	0	1	1	0	1	27	4	2	4	9	2	3	0	0	1	0
139	EILP	16	4	1	8	0	2	14	2	8	5	0	0	3	3	1	1	0	3	0	2	35	0	7	2	1	0	0	13	2	1	0	0	1	3	10	0	2	31	0	0	10	14	0	4	2	0	0	0
135	EILP	11	4	3	10	0	1	13	6	8	16	0	1	1	1	0	2	0	3	4	3	24	1	1	0	4	1	1	31	2	1	0	1	2	1	4	2	0	23	3	0	10	10	0	6	2	0	0	0
133	EILP	7	3	1	3	0	0	48	8	2	19	0	0	3	1	0	2	0	1	2	0	26	0	5	1	0	1	0	2	0	1	0	2	1	0	6	2	2	21	3	4	4	2	0	2	4	0	1	0
130	EILP	8	0	1	3	0	1	21	6	6	4	1	3	2	1	1	5	1	4	1	2	25	0	4	0	5	5	0	8	2	0	0	2	0	0	8	5	3	37	3	7	11	8	1	5	1	0	1	1
127	EILP	7	4	1	0	0	0	29	4	3	7	1	5	3	2	1	9	1	0	1	1	29	1	5	0	0	2	4	12	4	1	0	2	1	0	3	2	1	36	1	3	10	9	0	2	0	0	2	0
125	EILP	13	7	1	4	0	0	13	4	6	9	0	2	4	3	0	0	3	5	2	1	44	0	3	3	0	1	0	3	3	2	1	1	1	0	4	0	2	31	1	2	9	15	0	5	2	0	1	0
122	EILP	4	1	1	1	0	0	4	4	2	14	0	3	2	4	1	3	0	1	2	7	29	0	7	0	1	4	1	4	4	0	0	1	3	0	11	4	1	33	2	2	19	9	2	6	0	0	3	0
120	EILP	5	9	0	1	0	1	19	6	10	0	0	2	0	3	2	1	2	7	3	5	12	1	5	0	0	1	2	6	0	1	1	0	1	1	5	2	1	26	0	6	10	20	0	4	1	0	1	0
118	EILP	5	2	1	1	0	2	7	0	4	2	0	1	0	1	0	1	2	5	3	1	30	3	1	1	1	3	2	3	3	0	1	1	0	0	5	1	3	43	2	1	3	7	0	2	0	0	0	0
116	EILP	2	1	0	3	0	4	31	3	1	3	0	1	5	5	0	6	1	2	0	2	31	1	2	1	0	1	0	13	1	2	0	0	0	0	5	3	0	46	4	2	7	16	0	3	2	0	0	0
113	EILP	2	0	0	2	0	2	15	5	2	9	1	1	6	2	2	4	0	1	0	0	35	4	1	0	1	2	0	3	0	2	0	2	3	1	15	4	0	40	4	2	18	7	0	4	0	0	1	0
107	EILP	7	5	4	0	0	1	15	7	2	8	1	4	4	1	1	6	0	3	1	0	38	2	3	3	1	0	0	3	1	2	0	1	1	0	11	2	1	34	1	4	17	12	1	5	0	0	0	0
105	EILP	6	8	0	0	0	0	44	7	9	8	0	4	2	0	0	5	0	1	1	0	38	0	3	1	1	2	1	1	0	2	0	0	0	0	0	0	0	29	1	5	5	10	0	1	0	0	1	0
103	EILP	1	4	3	1	0	2	24	4	0	4	0	2	4	1	1	5	2	0	4	3	31	1	5	0	0	1	2	4	0	3	1	1	1	3	0	0	2	43	2	6	11	18	0	1	0	0	0	0
101	EILP	5	8	0	2	0	1	35	9	4	6	2	5	0	0	0	3	1	1	1	0	19	0	0	0	0	3	1	2	0	0	0	0	3	0	2	3	0	27	7	9	4	17	2	0	0	0	0	0
99	EILP	8	0	0	0	0	1	4	2	2	5	0	2	2	1	0	2	0	7	4	4	39	3	5	0	1	0	0	7	0	0	0	0	2	1	4	0	0	47	4	1	11	7	0	5	1	0	2	0
98	EILP	9	1	1	2	0	0	37	6	4	1	1	2	8	1	0	2	3	3	1	1	23	3	3	0	0	3	0	2	2	0	1	0	2	3	10	2	0	32	3	10	10	13	1	6	0	0	2	0
94	EILP	2	3	2	0	0	0	9	3	3	6	0	3	2	3	0	11	3	0	1	1	40	4	3	1	0	0	0	2	1	1	0	1	1	0	6	3	1	43	2	4	8	6	1	7	0	0	0	0
90	EILP	0	1	1	0	0	0	21	5	4	5	0	3	6	3	0	4	2	1	1	0	33	2	6	1	2	3	1	3	0	0	0	1	2	2	10	2	5	58	3	3	7	7	1	2	1	0	0	0
88	EILP	6	1	0	0	0	2	28	2	1	6	0	2	2	2	0	11	1	1	1	1	25	0	6	0	0	1	0	1	0	1	2	1	0	0	2	3	0	50	6	3	8	14	0	2	1	0	0	0
86	EILP	6	5	0	0	0	1	11	14	9	4	0	3	3	2	1	3	2	4	1	3	34	3	1	0	1	4	1	5	1	0	0	1	0	1	3	0	0	31	4	3	7	10	1	3	1	0	0	0
84	EILP	9	2	0	0	0	1	42	5	7	4	0	2	3	0	1	5	0	0	2	0	26	1	1	1	0	3	0	1	1	1	1	1	2	1	2	3	1	42	3	4	15	17	1	2	1	0	0	0
82	EILP	4	0	0	0	0	0	9	5	3	4	0	1	1	1	3	4	5	3	4	2	36	0	7	0	0	2	0	2	0	1	0	4	1	0	2	1	1	55	0	4	12	15	0	3	1	0	0	0
75	EILP	5	0	0	0	0	0	11	3	4	2	0	0	0	0	0	0	2	4	1	1	22	0	5	0	1	0	1	0	0	0	0	0	1	0	7	2	0	26	2	1	7	4	1	1	0	0	0	0
73	EILP	2	5	0	0	0	1	10	4	4	8	0	0	5	2	2	2	2	2	1	3	29	1	3	0	2	2	1	0	2	1	0	2	1	2	4	2	1	59	3	6	20	13	0	8	1	0	0	0
69	EILP	6	1	0	0	0	0	29	3	1	12	0	2	1	2	2	9	0	1	1	0	32	1	6	1	2	1	0	4	0	0	0	2	3	1	4	3	1	50	4	2	13	6	0	5	0	0	0	0
67	EILP	2	0	0	0	0	1	10	2	2	5	0	1	7	0	0	6	1	3	3	2	43	0	3	1	0	1	1	0	1	0	0	1	0	2	14	1	0	65	4	0	10	6	1	3	1	0	0	0
65	EILP	4	3	1	0	0	0	32	4	4	10	1	2	2	0	1	11	0	1	0	0	28	1	5	0	0	1	1	3	0	0	0	0	1	2	4	2	0	42	6	2	14	15	0	2	0	0	1	0
62	EILP	2	2	0	0	0	0	15	8	3	15	1	2	4	1	0	3	2	1	0	0	40	0	3	0	1	0	2	6	1	0	2	1	1	1	4	1	0	48	1	4	18	9	1	1	0	0	0	0
58	EILP	1	0	0	0	0	0	14	5	1	7	0	3	2	3	4	1	0	4	0	2	55	0	3	0	1	3	0	3	5	1	0	0	1	0	5	5	2	22	8	2	17	11	0	5	0	0	0	0
56	EILP	4	3	0	0	0	0	31	1	3	8	1	1	6	2	1	6	2	0	1	0	35	2	6	1	0	2	0	2	0	0	0	1	1	0	4	1	3	36	6	3	14	8	0	1	2	0	1	0
55	EILP	11	4	1	1	0	2	10	3	6	3	0	7	2	1	1	2	1	4	1	1	37	0	3	0	1	5	1	1	3	1	0	0	2	2	2	2	2	30	5	3	11	11	0	6	1	0	0	0
54	EILP	5	3	1	1	0	1	14	2	3	8	0	5	8	0	0	3	0	4	2	2	22	5	8	0	2	5	0	1	2	2	0	0	1	1	10	1	1	49	2	2	18	6	1	1	2	0	0	0
53	EILP	2	1	1	0	0	0	9	8	4	12	0	2	1	0	3	3	1	2	2	2	47	0	7	0	0	1	3	6	5	1	0	1	3	0	3	2	0	50	4	2	10	8	0	2	0	0	0	0
52	EILP	1	2	0	0	0	1	13	2	10	4	1	0	3	0	0	5	0	1	3	0	28	0	5	3	0	1	1	1	0	0	0	2	0	1	5	2	0	45	1	0	13	4	1	1	1	0	0	0
51	EILP	2	0	4	10	1	33	0	0	2	1	6	1	1	0	0	1	2	0	0	3	15	0	6	0	1	0	4	0	4	1	0	0	0	1	2	2	7	55	1	1	14	3	2	30	5	0	1	0
48	EILP	31	0	18	2	0	17	6	0	0	8	2	0	0	0	0	6	0	2	0	7	44	0	2	0	0	1	0	4	5	0	0	0	0	1	1	0	0	43	0	0	8	2	0	5	1	0	0	0
46	EILP	1	2	0	0	0	1	37	3	2	8	0	2	5	0	0	3	1	1	0	4	26	1	6	0	0	4	1	2	0	0	0	2	1	0	4	0	2	44	4	3	14	9	1	8	0	0	1	0
43	EILP	6	2	1	0	0	1	8	2	1	3	0	8	5	0	0	3	0	2	0	2	36	1	5	0	0	2	3	2	0	0	0	0	0	2	7	5	2	49	6	4	9	12	1	1	0	0	0	0
41	EILP	3	6	0	1	0	0	23	7	10	5	0	5	3	2	0	4	2	2	0	4	37	0	1	0	0	0	0	5	0	0	2	1	4	1	2	1	1	20	3	1	10	15	0	2	1	0	1	0
40	EILP	4	3	0	0	0	0	28	3	8	10	0	5	2	0	1	7	1	1	3	2	35	1	3	1	0	4	0	3	0	1	0	1	0	2	3	3	0	30	1	6	12	19	2	1	1	0	0	0
36	EILP	0	1	0	0	0	0	12	8	2	6	2	3	3	2	5	5	0	2	4	1	33	0	4	1	1	5	0	2	3	1	0	3	5	1	7	1	1	59	2	2	19	21	2	3	2	0	0	0
34	EILP	7	4	0	1	0	0	45	10	6	5	0	4	1	1	0	7	3	1	0	0	30	0	0	0	0	1	1	5	0	0	1	2	2	0	1	1	0	27	3	2	9	19	1	4	1	0	1	0
32	EILP	5	3	1	0	0	1	35	3	3	4	0	5	2	4	1	5	0	1	1	0	21	1	1	0	0	0	0	2	1	0	2	0	2	2	3	0	0	48	0	3	6	14	1	2	2	0	0	0
30	EILP	3	4	0	0	0	2	36	11	7	9	0	8	0	1	0	8	2	0	1	1	30	0	4	1	0	0	0	1	4	3	2	1	1	1	1	2	6	14	0	2	22	12	1	5	0	0	0	0
28	EILP	5	9	0	0	0	0	51	12	3	8	0	2	1	3	0	6	0	0	0	2	27	0	1	0	0	2	0	2	0	1	1	1	1	1	4	2	3	24	2	1	9	17	0	4	1	0	1	0
26	EILP	2	1	0	1	0	2	24	5	3	12	1	0	2	0	0	8	1	1	0	0	45	0	3	0	0	0	3	2	2	2	2	0	0	0	0	1	1	46	0	2	14	12	0	4	0	0	0	0
24	EILP	5	1	0	1	0	0	31	3	6	4	0	1	3	3	0	6	0	1	0	0	30	0	6	0	0	0	0	2	1	0	0	1	2	0	5	2	2	48	5	1	9	17	0	1	3	0	0	0
21	EILP	10	4	0	0	0	0	13	4	3	8	0	6	3	3	0	1	0	3	5	0	50	2	5	0	0	1	1	4	2	0	0	1	1	2	1	0	1	34	4	3	7	10	0	1	2	0	0	0
19	EILP	4	3	0	0	0	1	51	8	8	8	0	3	3	5	1	8	3	2	1	1	20	1	2	0	0	3	3	2	0	2	1	1	0	0	0	1	0	17	1	2	12	20	0	2	1	0	0	0
18	EILP	4	1	0	0	0	1	50	0	7	11	0	2	4	5	0	7	0	1	2	4	27	0	3	0	0	1	1	1	0	1	1	0	2	1	9	2	2	25	3	1	7	10	0	2	1	0	0	0
14	EILP	6	9	0	0	0	0	40	14	4	9	0	2	1	2	1	8	0	1	0	4	27	0	1	0	0	3	0	5	0	0	0	1	2	1	1	1	1	19	5	4	16	17	2	3	0	0	0	0
13	EILP	5	6	0	0	0	1	39	12	13	11	0	4	3	1	1	10	2	2	0	0	42	0	3	0	1	1	1	7	2	0	2	1	1	0	2	2	3	9	2	1	5	16	0	1	0	0	0	0
11	EILP	5	2	0	0	0	0	44	5	6	3	0	1	7	2	1	6	1	0	1	0	31	0	1	0	0	3	0	0	0	0	0	0	0	1	3	1	3	40	2	5	9	11	1	4	0	0	1	0
9	EILP	1	1	0	0	0	0	43	7	6	5	0	5	2	9	0	11	0	4	0	3	34	1	6	0	1	1	1	3	0	0	2	0	1	0	7	2	2	23	2	3	6	5	1	1	2	0	0	0
7	EILP	3	4	0	0	0	0	24	8	2	2	0	3	1	3	0	3	2	5	2	0	56	0	2	0	0	1	0	3	1	3	0	1	1	1	3	2	0	20	1	4	11	9	0	2	0	0	0	0
6	EILP	4	0	0	0	0	0	65	7	9	8	0	2	4	4	0	4	0	3	2	1	38	0	1	0	0	1	0	2	1	0	1	0	3	0	1	0	4	19	0	3	7	13	0	2	3	0	0	0
5	EILP	7	1	0	0	0	0	43	9	6	8	0	0	4	3	1	4	0	2	4	0	33	0	6	1	0	1	0	0	1	1	1	0	1	0	5	2	2	39	5	1	16	6	0	0	2	0	0	0
4	EILP	8	2	0	0	0	0	42	4	3	7	0	4	6	0	1	5	1	0	4	1	29	1	3	0	0	2	1	3	0	1	0	2	3	1	2	2	2	34	1	2	12	6	0	4	2	0	0	0
3	EILP	3	2	0	0	0	0	17	3	17	4	0	3	4	6	0	3	0	2	3	0	34	0	5	0	5	1	2	1	1	1	0	1	3	1	3	0	0	33	0	7	7	5	2	5	0	0	0	0
5.7	Offenthal	2	0	1	0	0	3	0	0	12	4	0	0	0	0	0	7	3	0	0	0	30	0	1	0	0	0	0	1	0	2	0	0	0	0	0	1	2	64	4	0	4	27	0	1	0	0	0	0
5.9	Offenthal	8	0	1	0	0	10	0	0	16	4	0	0	0	0	1	4	2	0	0	0	36	0	4	0	0	0	0	0	0	0	0	0	0	0	7	0	3	64	5	0	7	26	0	3	1	0	0	0
6.2	Offenthal	7	0	2	0	0	10	3	0	39	4	0	0	0	0	0	5	7	0	0	0	37	0	4	0	0	0	0	1	0	1	0	0	0	0	7	0	3	69	8	1	4	14	0	2	0	0	0	0
6.7	Offenthal	9	0	1	0	0	2	0	0	10	10	0	0	0	0	0	12	0	0	0	0	62	0	2	0	0	0	0	0	3	2	0	0	0	0	7	2	4	55	5	0	4	31	0	0	0	0	0	0
7.1	Offenthal	10	0	0	0	0	3	2	1	15	3	0	0	0	0	1	5	2	0	0	0	32	1	3	0	0	4	0	1	2	2	0	0	0	0	15	1	2	85	4	0	6	10	0	4	1	0	0	0
7.4	Offenthal	11	0	3	0	0	1	1	1	26	5	0	0	0	0	2	5	0	0	0	0	37	2	4	0	0	0	0	2	1	1	0	1	0	0	12	2	3	64	5	0	4	37	0	5	3	0	0	0
7.8	Offenthal	5	0	1	0	0	0	1	1	26	6	0	2	0	0	4	3	1	0	0	0	23	0	6	0	0	0	0	2	5	0	1	0	0	0	9	1	7	74	8	1	1	11	0	4	2	0	0	0
8.2	Offenthal	2	0	0	0	0	1	1	0	11	4	0	3	0	0	2	9	2	0	0	0	43	0	3	0	0	0	0	2	4	0	4	0	0	0	12	3	14	46	3	1	12	26	0	4	0	0	0	0
8.55	Offenthal	5	0	1	0	0	0	2	0	8	6	0	1	0	0	0	3	1	0	0	0	33	1	3	0	0	0	0	3	0	0	1	0	0	0	22	0	7	96	10	0	6	22	0	6	0	0	0	0
8.9	Offenthal	8	0	0	0	0	3	0	0	8	5	0	1	0	0	0	5	1	0	0	0	29	0	3	0	0	1	0	1	1	1	2	0	0	0	8	1	8	97	7	0	10	16	0	3	0	0	0	0
9.3	Offenthal	7	0	1	0	0	1	2	0	6	5	0	2	0	0	1	5	1	0	0	0	43	0	3	0	0	0	0	0	0	1	3	0	0	0	10	1	4	87	5	0	9	5	3	7	1	0	0	0
9.7	Offenthal	19	0	1	0	0	5	1	0	14	3	0	0	0	0	0	5	0	0	0	0	36	0	4	0	0	5	0	0	2	2	0	0	0	0	14	2	7	70	5	2	2	28	0	6	0	0	0	0
10.05	Offenthal	10	0	1	0	0	1	1	0	2	5	0	1	1	0	2	5	1	0	0	0	41	1	5	0	1	0	0	1	2	0	0	1	0	0	15	0	3	67	9	1	10	16	0	10	0	0	0	0
10.4	Offenthal	16	0	2	0	0	2	0	0	1	4	0	1	0	0	0	10	0	0	0	0	61	2	6	0	0	6	0	0	3	1	2	0	0	0	14	2	5	57	4	1	3	8	0	8	0	0	0	0
10.8	Offenthal	19	0	1	0	0	2	2	0	5	8	0	0	0	0	3	7	3	0	0	0	47	0	4	0	0	3	0	3	4	2	1	0	0	0	17	1	8	61	4	3	5	10	0	7	0	0	0	0
11.2	Offenthal	38	0	0	0	0	2	1	1	8	7	0	1	0	0	2	3	0	0	0	0	32	0	5	0	0	1	0	0	4	2	0	0	0	0	7	3	3	60	2	0	8	17	0	4	0	0	0	0
11.55	Offenthal	21	0	2	0	0	0	2	0	8	6	0	3	0	0	4	8	0	0	0	0	44	1	4	0	0	2	0	1	4	1	2	1	0	0	13	3	8	52	3	0	8	7	0	2	0	0	0	0
11.9	Offenthal	30	0	1	0	0	0	6	0	13	7	0	2	0	0	1	6	1	0	0	0	57	2	3	0	0	3	0	2	4	0	2	0	0	0	19	2	4	73	5	2	4	11	0	2	1	0	0	0
12.3	Offenthal	20	0	1	0	0	5	3	0	8	2	0	0	0	0	2	7	2	0	0	0	44	1	4	0	0	2	0	0	5	1	0	0	0	0	19	2	4	76	11	3	6	10	0	6	1	0	0	0
12.5	Offenthal	10	0	0	0	0	10	1	0	8	5	0	2	0	0	1	1	0	0	0	0	50	0	4	0	0	2	0	3	4	3	1	0	0	0	14	1	7	74	7	4	7	6	0	7	0	0	0	0
12.7	Offenthal	10	0	0	0	0	6	1	0	11	6	0	0	0	0	0	2	3	0	0	0	34	0	2	0	0	2	0	0	4	1	0	0	0	0	14	2	2	78	8	0	6	10	0	3	1	0	0	0
12.95	Offenthal	19	0	2	0	0	6	3	2	6	9	0	0	2	0	2	1	0	0	0	0	20	1	0	0	0	3	0	0	3	1	2	0	0	0	15	1	6	67	2	0	3	7	0	4	1	0	0	0
13.2	Offenthal	16	0	3	0	0	0	1	2	12	10	0	0	0	0	0	3	2	0	0	0	38	2	2	0	0	2	0	0	5	5	1	0	1	0	20	2	8	64	4	0	7	2	0	3	1	0	0	0
13.4	Offenthal	52	0	6	0	0	3	4	2	12	3	0	3	0	0	1	6	2	0	0	0	37	0	3	0	0	1	0	2	3	3	0	0	0	0	12	2	1	39	5	0	6	3	0	0	0	0	0	0
13.6	Offenthal	27	0	0	0	0	2	2	1	12	4	0	3	0	0	1	6	4	0	0	0	50	0	3	0	0	2	0	0	4	1	2	0	1	0	15	2	5	65	4	1	6	2	0	1	0	0	0	0
13.9	Offenthal	51	0	2	0	0	5	1	1	16	1	0	2	0	0	0	4	4	0	0	0	45	1	3	0	0	2	0	3	3	1	1	0	0	0	21	3	7	48	4	0	8	5	0	1	1	0	0	0
14.1	Offenthal	20	0	4	0	0	4	2	1	9	8	0	3	0	0	0	10	0	0	0	0	59	0	5	0	0	0	3	0	6	2	2	0	0	0	10	0	7	44	3	1	6	1	0	4	1	0	0	0
14.25	Offenthal	29	0	3	0	0	2	2	2	8	6	0	0	0	0	0	7	2	0	0	0	78	0	6	0	0	0	0	1	5	2	2	0	0	0	4	2	3	52	1	0	4	3	0	3	1	0	0	0
14.4	Offenthal	12	0	3	0	0	4	3	1	8	8	0	1	0	0	0	7	0	0	0	0	54	2	10	0	0	1	0	2	3	1	1	0	0	0	7	1	3	53	4	0	8	4	0	4	1	0	0	0
14.55	Offenthal	15	0	5	0	0	6	3	2	9	9	0	0	0	0	1	8	0	0	0	0	43	1	5	0	0	3	0	1	6	1	2	0	0	0	22	0	5	94	8	1	4	1	0	2	1	0	0	0
14.7	Offenthal	32	0	4	1	0	7	1	1	8	10	2	0	0	0	1	2	0	0	0	0	35	1	8	0	0	7	0	0	4	3	1	0	0	0	12	1	4	87	5	1	11	2	0	4	1	0	0	0
14.85	Offenthal	17	0	6	0	0	7	0	0	14	5	4	0	0	0	1	12	0	0	0	0	41	0	5	0	0	2	0	0	9	3	2	0	1	0	8	0	3	74	8		10	2	0	4	1	0	1	0
15.05	Offenthal	25	0	5	0	0	5	1	0	5	7	6	1	0	0	0	6	1	0	0	0	38	0	4	0	0	3	0	0	4	0	3	0	0	0	3	1	1	59	2	2	7	4	0	4	0	0	0	0
15.2	Offenthal	2	0	0	0	0	0	0	0	5	5	1	1	0	0	1	7	1	0	0	0	53	0	3	0	0	3	0	2	4	1	2	0	0	0	7	0	2	85	2	0	11	5	0	3	0	0	0	0
15.5	Offenthal	13	0	6	0	0	8	0	0	4	4	2	1	0	0	0	8	0	0	0	0	50	1	5	0	0	4	0	1	7	3	3	0	0	0	2	1	0	79	3	1	9	4	0	2	2	0	0	0
15.9	Offenthal	27	0	4	0	0	10	2	0	10	8	2	0	0	0	1	1	0	0	0	0	45	0	4	0	0	0	0	1	5	2	3	0	0	0	5	0	5	63	3	1	7	1	0	2	0	0	0	0
16.1	Offenthal	9	0	4	0	0	3	2	0	1	8	6	4	0	0	0	4	1	0	0	0	56	0	6	0	0	3	0	3	6	3	0	0	0	0	18	0	2	60	11	3	9	4	0	1	0	0	0	0
16.25	Offenthal	16	0	2	0	0	3	5	0	11	5	1	4	0	0	4	9	1	0	0	0	50	0	2	0	0	3	0	4	5	0	1	0	0	0	3	1	4	57	10	1	11	6	0	3	1	0	0	0
16.45	Offenthal	21	0	6	0	0	8	1	0	6	5	4	5	0	0	2	1	0	0	0	0	54	1	7	0	0	2	0	0	6	0	2	0	0	0	6	0	5	62	6	0	10	4	0	2	0	0	0	0
16.6	Offenthal	18	0	7	0	0	7	1	0	7	7	3	1	3	0	1	2	2	0	0	0	43	1	6	0	0	2	0	0	8	1	0	0	0	0	9	4	8	51	4	0	12	5	0	4	0	0	0	0
16.8	Offenthal	4	0	3	0	0	7	0	0	6	12	7	2	0	0	0	9	0	0	0	0	52	2	1	0	0	5	0	0	5	2	3	0	0	0	17	1	3	62	3	1	6	5	0	0	2	0	0	0
17	Offenthal	18	0	5	0	0	3	1	0	6	7	8	1	0	0	1	6	0	0	0	0	47	0	8	0	0	4	0	0	2	1	2	0	0	0	8	2	6	61	2	0	10	11	1	2	2	0	0	0
17.2	Offenthal	22	0	5	0	0	8	1	0	9	9	4	4	0	0	1	8	1	0	0	0	46	0	3	0	0	4	0	2	1	0	5	0	0	0	16	0	9	64	8	1	7	6	0	2	1	0	0	0
17.4	Offenthal	11	0	7	0	0	6	1	0	8	4	4	2	0	0	1	6	3	0	0	0	43	0	5	0	0	0	0	2	3	1	2	0	0	0	5	1	3	52	8	1	11	6	0	1	1	0	0	0
17.6	Offenthal	10	0	6	0	0	16	0	2	5	11	2	3	0	0	1	10	0	0	0	0	49	3	2	0	0	4	0	0	6	3	1	0	0	0	24	2	6	56	1	0	24	3	0	3	0	0	0	0
17.75	Offenthal	23	0	7	0	0	14	2	5	5	9	8	1	0	0	2	9	1	0	0	0	40	1	3	0	0	4	0	0	7	3	0	0	0	0	9	1	3	67	4	0	12	10	0	7	0	0	0	0
17.9	Offenthal	17	0	2	0	0	5	1	1	7	9	1	4	0	0	2	6	0	0	0	0	50	0	0	0	0	1	0	2	7	2	6	0	0	1	5	1	2	79	7	1	9	2	0	3	0	0	0	0
18.1	Offenthal	13	0	8	0	0	11	1	0	10	10	2	3	0	0	0	7	3	0	0	0	56	0	4	0	0	3	2	2	3	4	4	0	0	0	6	2	1	57	2	1	10	4	0	1	1	0	0	0
18.3	Offenthal	8	0	5	0	0	8	2	1	9	7	8	0	0	0	0	13	1	0	0	0	42	3	4	0	0	3	0	1	9	0	1	0	0	0	6	0	4	60	1	1	15	13	0	2	1	0	0	0
18.5	Offenthal	30	0	9	0	0	4	1	1	8	6	0	0	0	0	0	5	0	0	0	1	38	1	5	0	1	2	0	4	1	0	0	0	0	0	6	0	2	54	4	2	10	14	2	7	1	0	0	0
18.7	Offenthal	29	0	13	0	0	2	2	0	8	8	5	2	0	0	0	1	0	0	0	0	54	0	2	0	1	2	0	5	9	1	6	0	0	1	8	0	3	41	12	3	7	8	0	2	3	0	0	0
18.9	Offenthal	23	0	21	0	0	26	0	0	7	11	0	2	1	0	0	2	3	0	0	0	29	1	0	0	0	2	0	2	3	5	2	0	0	0	5	0	0	72	5	1	4	4	0	2	1	0	0	0
19.1	Offenthal	22	0	8	0	0	3	1	0	10	5	1	1	0	0	0	2	1	0	0	0	39	1	2	0	0	2	0	1	2	3	4	0	0	0	8	1	4	57	1	0	22	11	0	2	0	0	0	0
19.25	Offenthal	14	0	6	0	0	6	0	1	15	8	1	4	1	0	2	8	2	0	0	0	44	0	6	0	0	1	0	0	5	1	3	0	0	0	18	0	5	68	4	0	16	8	0	1	2	0	0	0
19.45	Offenthal	15	0	13	0	0	8	3	1	9	7	6	2	0	0	0	6	0	0	0	0	45	0	4	0	0	2	0	0	3	7	4	0	0	0	7	2	3	55	5	2	12	7	0	2	1	0	0	0
19.6	Offenthal	15	0	10	0	0	3	2	0	11	7	4	4	0	0	2	7	3	0	0	0	33	0	4	0	1	0	0	0	5	4	1	0	0	1	2	3	4	71	8	2	6	10	0	3	2	0	0	0
19.8	Offenthal	29	0	10	0	0	4	0	0	11	15	2	5	0	0	1	5	0	0	0	0	25	0	3	0	0	0	0	2	7	1	0	0	1	0	7	0	2	63	9	1	13	7	3	1	0	0	0	0
20	Offenthal	26	0	20	1	0	16	3	1	11	6	3	0	0	0	0	1	0	0	0	0	25	0	2	0	0	1	0	1	3	1	0	0	0	0	3	0	5	52	1	1	8	5	3	2	0	0	0	0
20.2	Offenthal	23	0	7	0	0	6	0	1	11	4	4	1	1	0	1	1	1	0	0	0	25	0	2	0	0	2	0	2	5	3	3	0	0	1	16	1	7	82	3	0	11	14	1	1	1	0	0	0
20.4	Offenthal	12	0	8	0	0	2	3	1	15	10	6	0	0	0	0	8	2	0	0	0	29	2	1	0	1	1	0	0	7	2	0	0	1	2	7	1	1	57	6	0	11	10	0	0	1	0	0	0
20.6	Offenthal	19	0	10	1	0	4	2	0	8	4	2	3	1	0	2	5	1	0	0	0	41	0	5	0	1	2	0	0	7	4	2	0	0	0	5	7	2	28	3	2	15	18	0	3	0	0	0	0
20.8	Offenthal	27	0	14	2	0	3	0	0	11	9	1	1	0	0	1	7	2	0	0	1	20	0	3	0	0	1	0	0	5	5	0	0	0	0	25	0	2	60	8	2	10	16	1	7	0	0	0	0
21	Offenthal	22	0	12	1	0	2	2	0	12	9	2	1	0	0	0	8	3	0	0	0	29	2	2	0	0	3	0	0	3	2	1	0	0	0	2	2	1	72	6	0	14	13	0	2	1	0	0	0
21.32	Offenthal	37	0	8	0	0	4	1	0	2	7	0	0	0	0	0	7	2	0	0	0	34	1	0	0	0	1	0	0	1	0	1	0	0	0	7	1	1	26	2	1	3	5	0	0	1	0	0	0
22.1	Offenthal	20	0	29	0	0	1	2	0	1	17	1	0	0	0	0	6	3	0	0	0	40	1	6	0	0	1	0	0	3	1	3	0	0	0	2	2	0	45	6	1	16	3	0	0	0	0	0	0
Summe		2834	201	487	700	74	658	2690	509	3202	2154	540	1212	409	123	267	3799	201	1173	1584	945	48708	1087	5066	684	291	1033	360	4007	1206	474	227	2423	260	548	20089	974	1092	25998	1023	906	4667	3092	549	1424	196	121	393	98
Max		52	9	29	85	14	33	65	14	39	19	71	15	8	9	5	37	7	15	21	32	145	9	26	8	12	30	8	92	24	7	6	19	5	6	111	12	16	97	12	10	54	37	7	30	6	5	8	7
		PZ 5	PZ 4
		PZ 3	PZ 2
		PZ 1
[truncated: 8 more columns]
